# Supplementary material for: Chromosome rearrangements shape the diversification of secondary metabolism in the cyclosporin producing fungus Tolypocladium inflatum
Source: PubMed Central journal article supplement (PMC6367777; doi:10.1186/s12864-018-5399-x), 2019-02-07

**Figure S2.** Post-scaffolding heatmap of 8044 Hi-C data mapped to 10kb bins of the 8044 PacBio assembly. Dashed black lines correspond to chromosome boundaries and centromeres depicted as high-density dots in the middle of chromosomes. Strong Hi-C signal is seen along the diagonal. The blue lines within chromosome 6 correspond to boundaries of the two unitigs 43 and 34 that comprise chromosome six. The strong signal along the diagonal supports the relative orientation of these two unitigs forming chromosome 6 in the assembly.

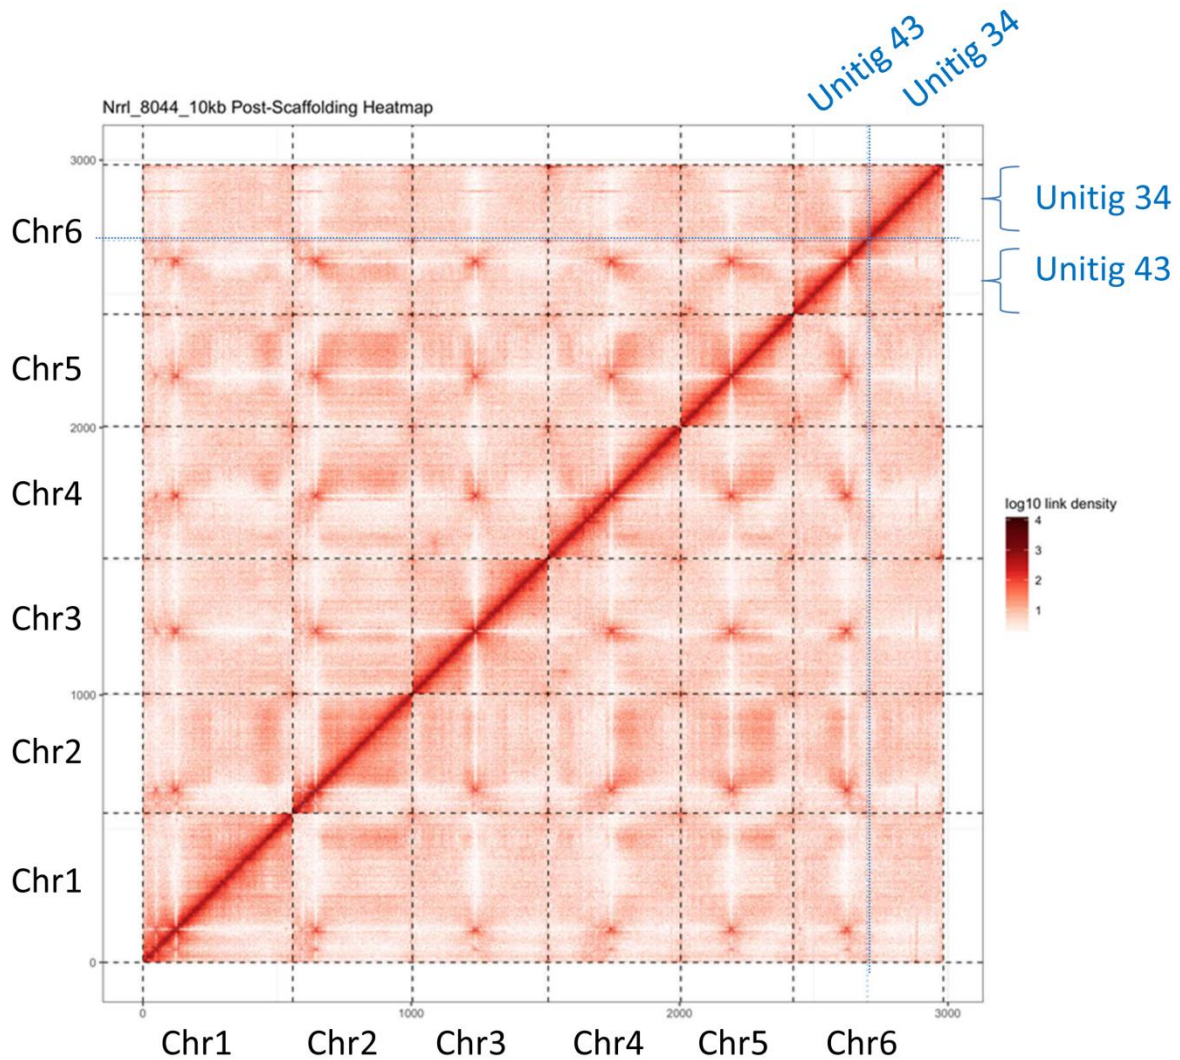

Supplement: 12864_2018_5399_MOESM3_ESM.pdf [file 12864_2018_5399_MOESM3_ESM.pdf]
