# Supplementary material for: Chromosome rearrangements shape the diversification of secondary metabolism in the cyclosporin producing fungus Tolypocladium inflatum
Source: PubMed Central journal article supplement (PMC6367777; doi:10.1186/s12864-018-5399-x), 2019-02-07

**Figure S3** MUMmer plots of each *T. inflatum* strain (x-axis) against CBS714.70 (y-axis). High levels of synteny were observed for nearly all strains with the exception of NRRL8044 (right), which showed evidence of a large 800 Kb translocation (A; green circle) from chromosome 2 to chromosome 6 and a smaller 200 Kb translocation and inversion (B; blue circle) from one end of chromosome 6 to the other end.

**NRRL8044**

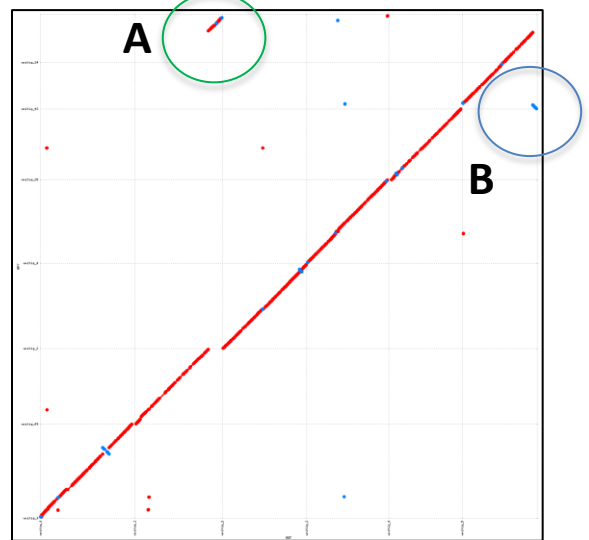

**CBS567.84**

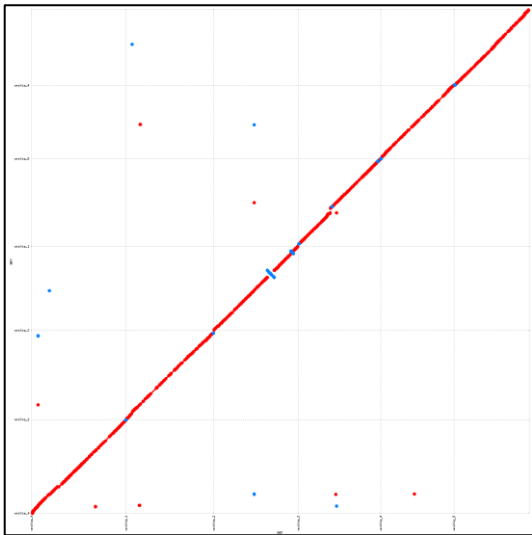

**CBS824.70**

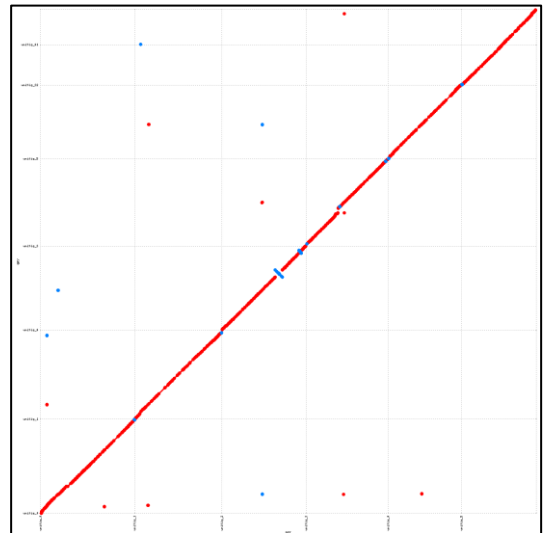

**NBRC31671**

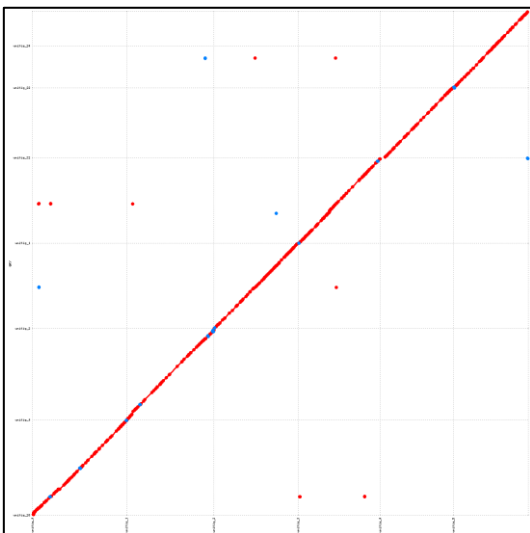

**NBRC31975**

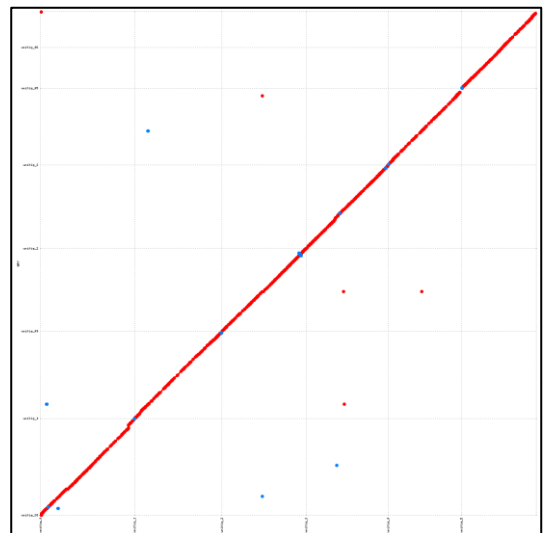

Supplement: 12864_2018_5399_MOESM6_ESM.pdf [file 12864_2018_5399_MOESM6_ESM.pdf]
