# Supplementary material for: Chromosome rearrangements shape the diversification of secondary metabolism in the cyclosporin producing fungus Tolypocladium inflatum
Source: PubMed Central journal article supplement (PMC6367777; doi:10.1186/s12864-018-5399-x), 2019-02-07

**SFigure 5.** Alignment of PacBio corrected reads to the junction of the major translocation from chromosome 2 to chromosome 6 in NRRL8044 show continuous coverage over this region.

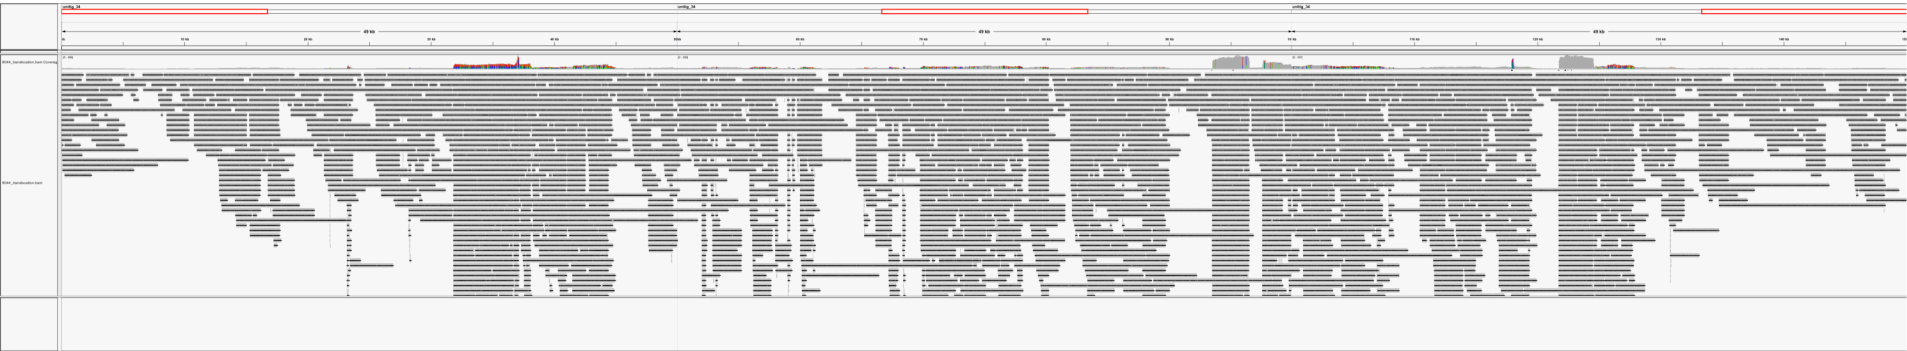

Supplement: 12864_2018_5399_MOESM8_ESM.pdf [file 12864_2018_5399_MOESM8_ESM.pdf]
