# Supplementary material for: Chromosome rearrangements shape the diversification of secondary metabolism in the cyclosporin producing fungus Tolypocladium inflatum
Source: PubMed Central journal article supplement (PMC6367777; doi:10.1186/s12864-018-5399-x), 2019-02-07
Supplement: 12864_2018_5399_MOESM10_ESM.pdf [file 12864_2018_5399_MOESM10_ESM.pdf]

**Supplemental Figure 6. Phylogeny of acetylation (A) domains across *S. infantum* strains. Maximum likelihood phylogeny created in RAxML using the best-fit amino acid substitution model RTREV + F and an automatically optimized number of bootstrap replicates. A domains belonging to the cyclosporin cluster are color coded purple while A domains involved in biosynthesis of peptidobiotics are color coded blue.**

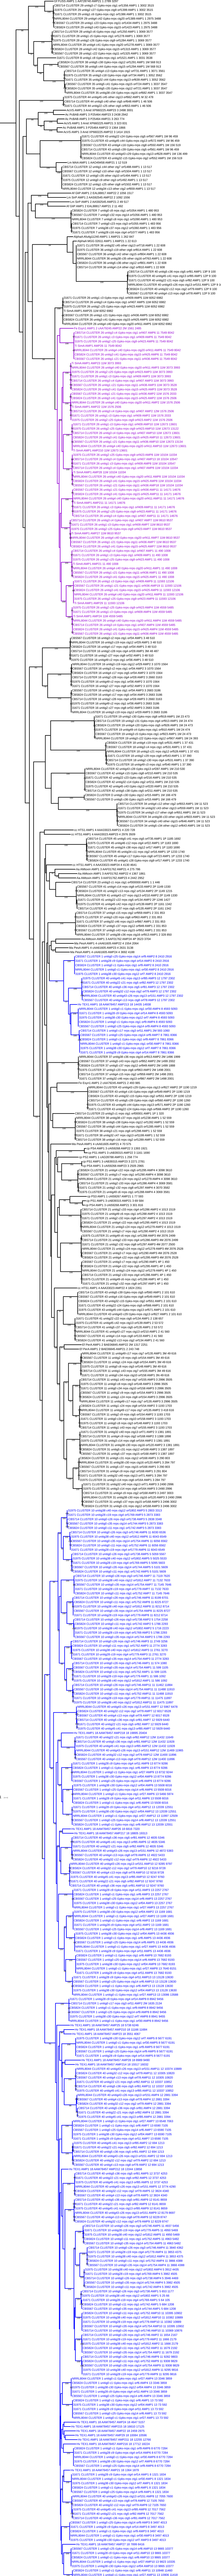

Tree Scale: 0.1
