# Supplementary material for: Chromosome rearrangements shape the diversification of secondary metabolism in the cyclosporin producing fungus Tolypocladium inflatum
Source: PubMed Central journal article supplement (PMC6367777; doi:10.1186/s12864-018-5399-x), 2019-02-07
Supplement: 12864_2018_5399_MOESM14_ESM.pdf [file 12864_2018_5399_MOESM14_ESM.pdf]

**Figure S9.** Alignment of gene content of gene cluster E in strain 8044 and cluster 27 in strains 31671 and 714.70, respectively. Arrows represent computationally annotated genes within each cluster, and colors indicate gene homology between the strains. Inlayed tables above and below figure are BLAST hits of each protein sequence corresponding to each gene. The 5' end of cluster 27 in 31671 is interrupted by a retrotransposon.

| NRRL 8044 |                                                                                                      |
|-----------|------------------------------------------------------------------------------------------------------|
| Gene No.  | BLAST hit                                                                                            |
| 8065      | PREDICTED: collagen alpha-1(V) chain isoform X1 [ <i>Xenopus tropicalis</i> ]                        |
| 8066      | myb family transcription factor [ <i>Hirsutella minnesotensis</i> 3608]                              |
| 8067      | Related to phospholipid-translocating ATPase [ <i>Fusarium fujikuroi</i> IMI 58289]                  |
| 8068      | MFS general substrate transporter [ <i>Aspergillus fijiensis</i> CBS 313.89]                         |
| 8069      | Putative polyketide synthase [ <i>Diaporthe ampelina</i> ]                                           |
| 8070      | Beta,beta-carotene 15,15'-monooxygenase [ <i>Tolypocladium ophioglossoides</i> CBS 100239]           |
| 8071      | Hypothetical protein                                                                                 |
| 8072      | ERAD-associated E3 ubiquitin-protein ligase doa10 [ <i>Tolypocladium ophioglossoides</i> CBS 100239] |
| 8073      | Nuclear distribution protein nudE [ <i>Tolypocladium paradoxum</i> ]                                 |
| 8074      | Acetyl-CoA carboxylase [ <i>Tolypocladium paradoxum</i> ]                                            |

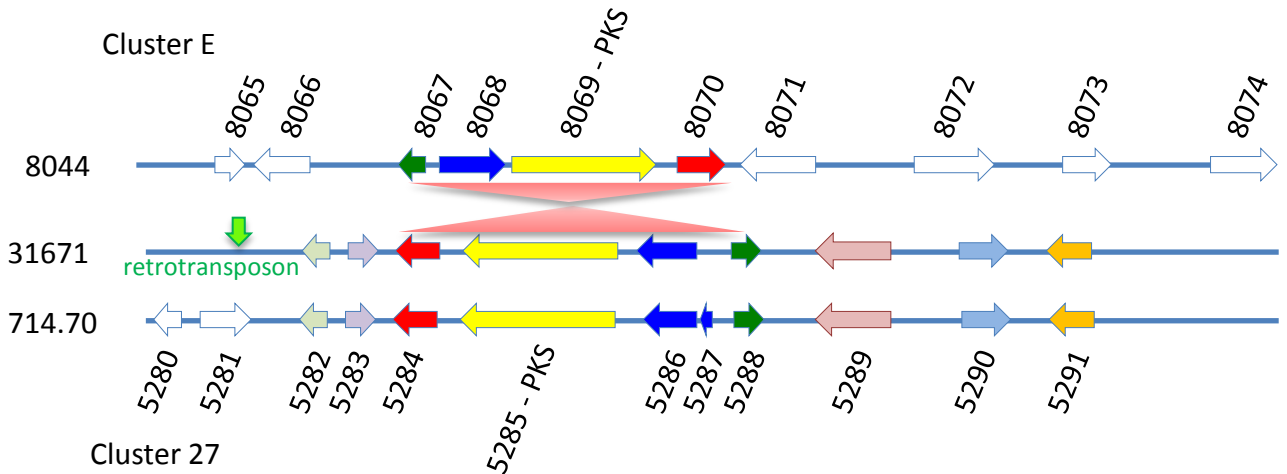

| CBS 714.70 |                                                                                  |
|------------|----------------------------------------------------------------------------------|
| Gene No.   | BLAST hit                                                                        |
| 5280       | Hypothetical protein                                                             |
| 5281       | Phosphotransferase family protein [ <i>Pochonia chlamydosporia</i> 170]          |
| 5282       | Hypothetical protein                                                             |
| 5283       | Hypothetical protein                                                             |
| 5284       | Beta,beta-carotene 15,15'-monooxygenase [ <i>Tolypocladium paradoxum</i> ]       |
| 5285       | Polyketide synthase [ <i>Cenococcum geophilum</i> 1.58]                          |
| 5286       | MFS general substrate transporter [ <i>Aspergillus fijiensis</i> CBS 313.89]*    |
| 5287       | apha/beta-Hydrolase [ <i>Glarea lozoyensis</i> ATCC 20868]*                      |
| 5288       | Related to phospholipid-translocating ATPase [ <i>Fusarium proliferatum</i> ET1] |
| 5289       | ABC transporter                                                                  |
| 5290       | LCCL domain-containing protein [ <i>Colletotrichum orchidophilum</i> ]           |
| 5291       | Peptidase A1 [ <i>Pochonia chlamydosporia</i> 170]                               |

\* The annotation of MFS transporter was split into two genes in 714.70, but was annotated as a single gene in both 8044 and 31671 and in the previous genome of strain 8044 (Bushley et al., 2013).
