# Supplementary material for: Chromosome rearrangements shape the diversification of secondary metabolism in the cyclosporin producing fungus Tolypocladium inflatum
Source: PubMed Central journal article supplement (PMC6367777; doi:10.1186/s12864-018-5399-x), 2019-02-07

**Figure 10.** Phylogeny of A domains datamined from peptidobiotic NRPSs from *Tolypocladium ophioglossoides* (TOPH), *Trichoderma virens* (TriviGv29;Tex1 and Tex2), and the six strains of *T. inflatum*. Phylogeny was created using maximum implemented in RAxML with best fit amino acid substitution model RT-REV + F and an automatically optimized number of bootstrap replicates. NRPSs from cluster 1 on the left arm of chromosome 1 on *T. inflatum* are color coded dusty pink (13 modular) and bright pink (8 modular). NRPSs from cluster 10 on the right arm of chromosome 1 are color coded light blue (5 modular) or dark blue (11 modular). NRPSs from cluster 40 on chromosome 6 are color coded green (12 modular). The relic A domain from cluster 42 on chromosome 6 is indicated with red bar.

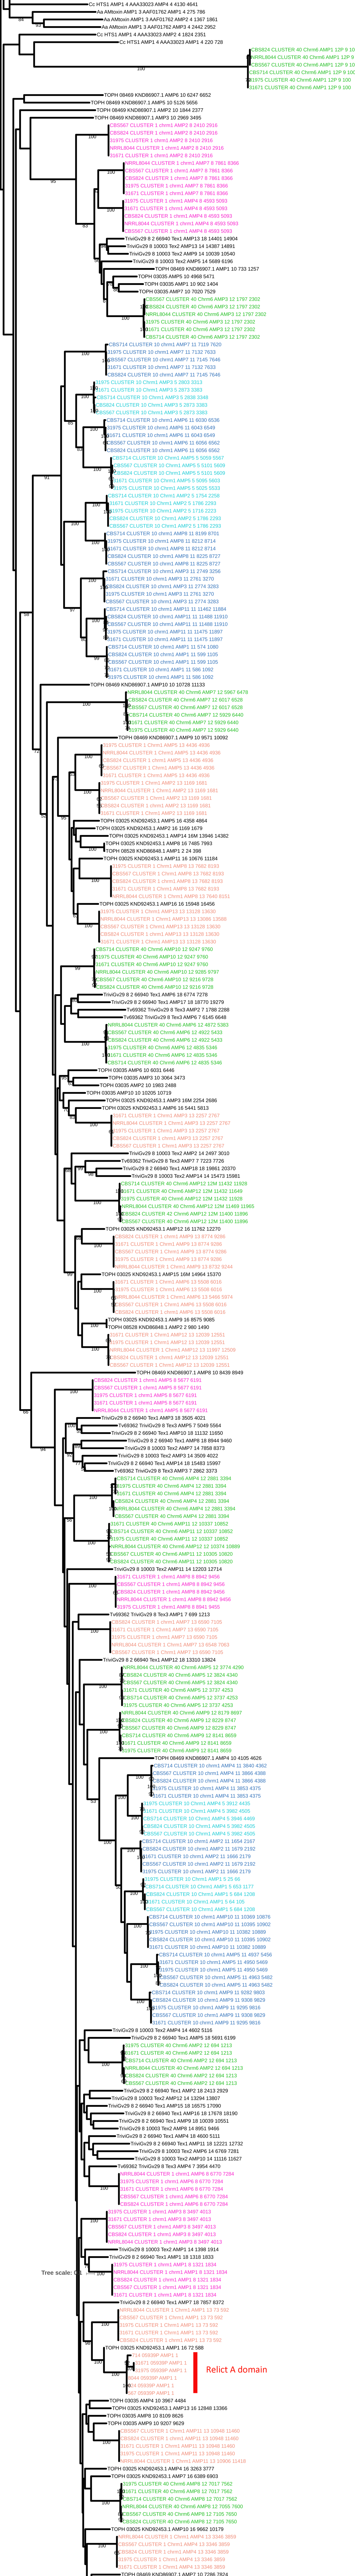

Supplement: 12864_2018_5399_MOESM15_ESM.pdf [file 12864_2018_5399_MOESM15_ESM.pdf]
