# Supplementary material for: Chromosome rearrangements shape the diversification of secondary metabolism in the cyclosporin producing fungus Tolypocladium inflatum
Source: PubMed Central journal article supplement (PMC6367777; doi:10.1186/s12864-018-5399-x), 2019-02-07

**Figure S11** Mauve alignments of peptaibiotic clusters 1, 42, and 10 across all *T. inflatum* strains showing evidence for deletion of large NRPS genes from **A)** clusters 1 in CBS714.70, **B)** loss of the complete cluster 10 in strain 8044, and **C)** cluster 42 in all strains of *T. inflatum* aligned to *T. ophioglossoides* cluster showing missing 16 and 10 modular NRPSs. Red shading shows syntenic blocks within SMBGCs and gray shading shows synteny flanking the clusters.

**A) Chromosome 1, Cluster 1**

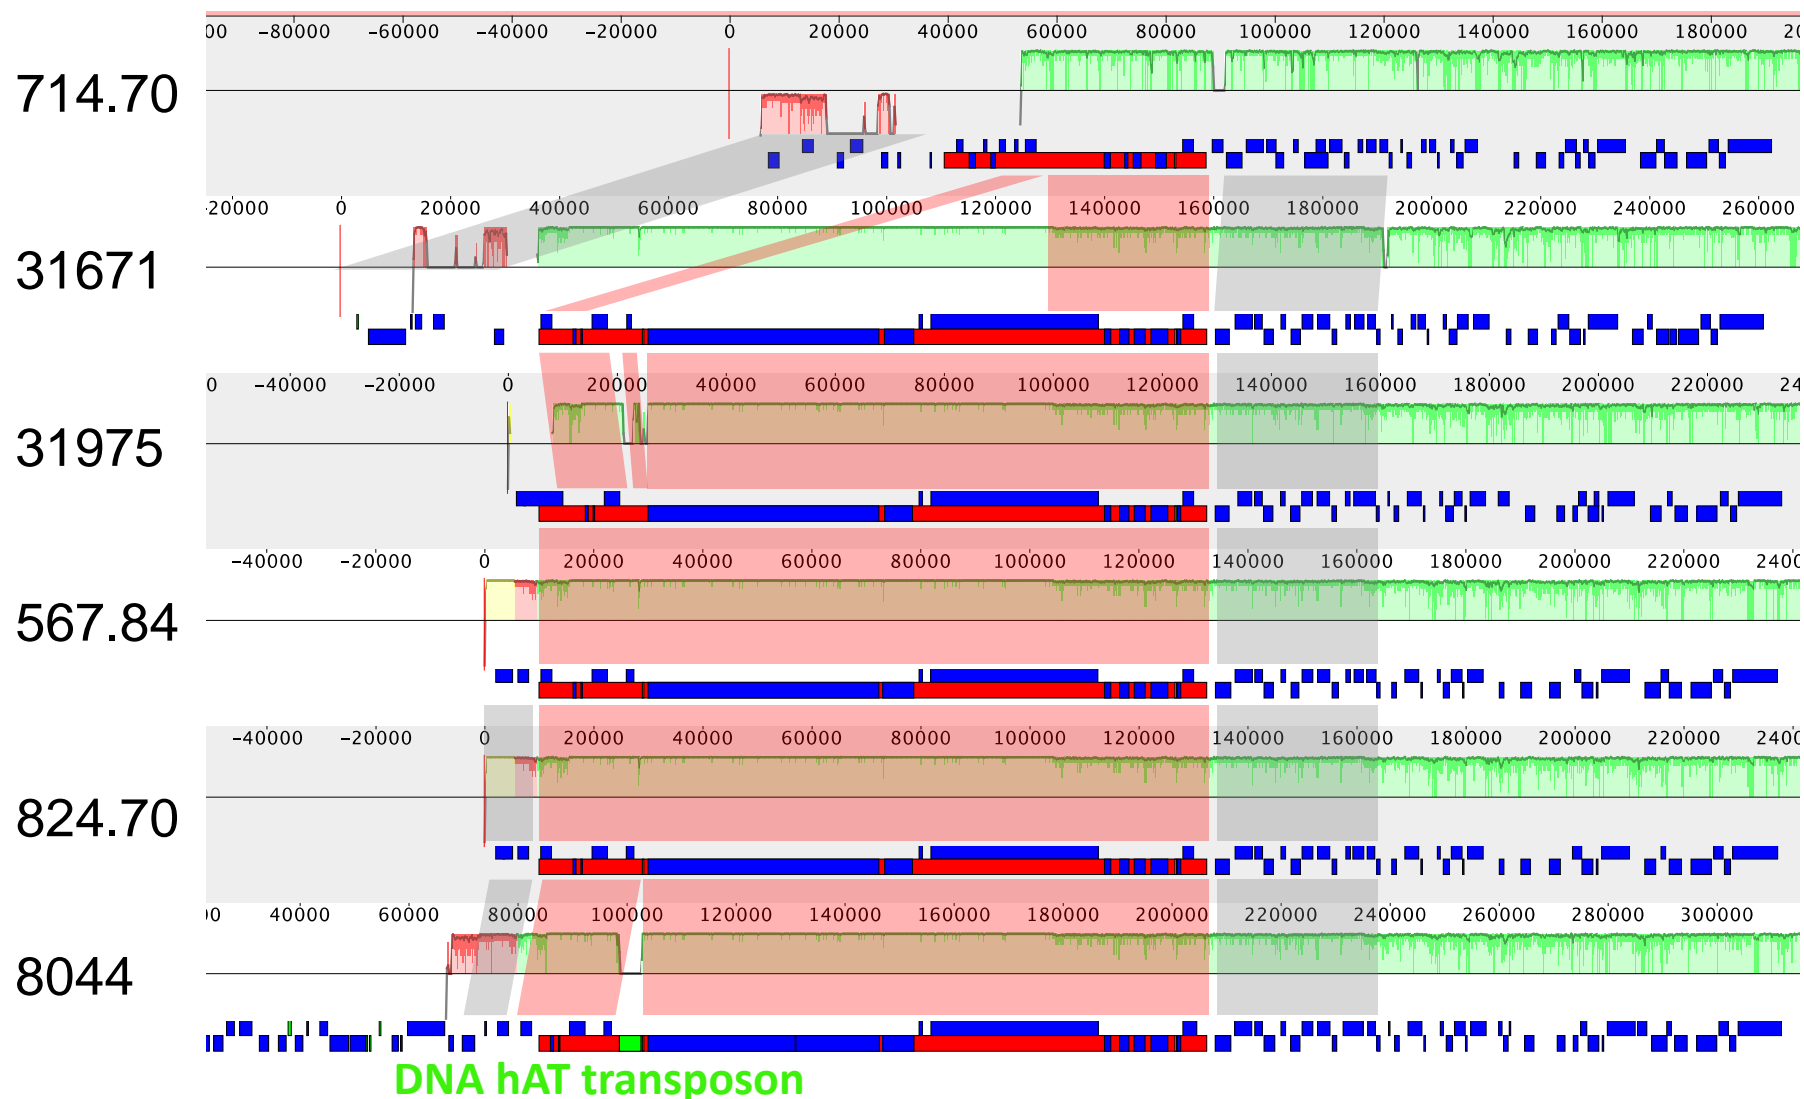

## B) Chromosome 1, Cluster 10

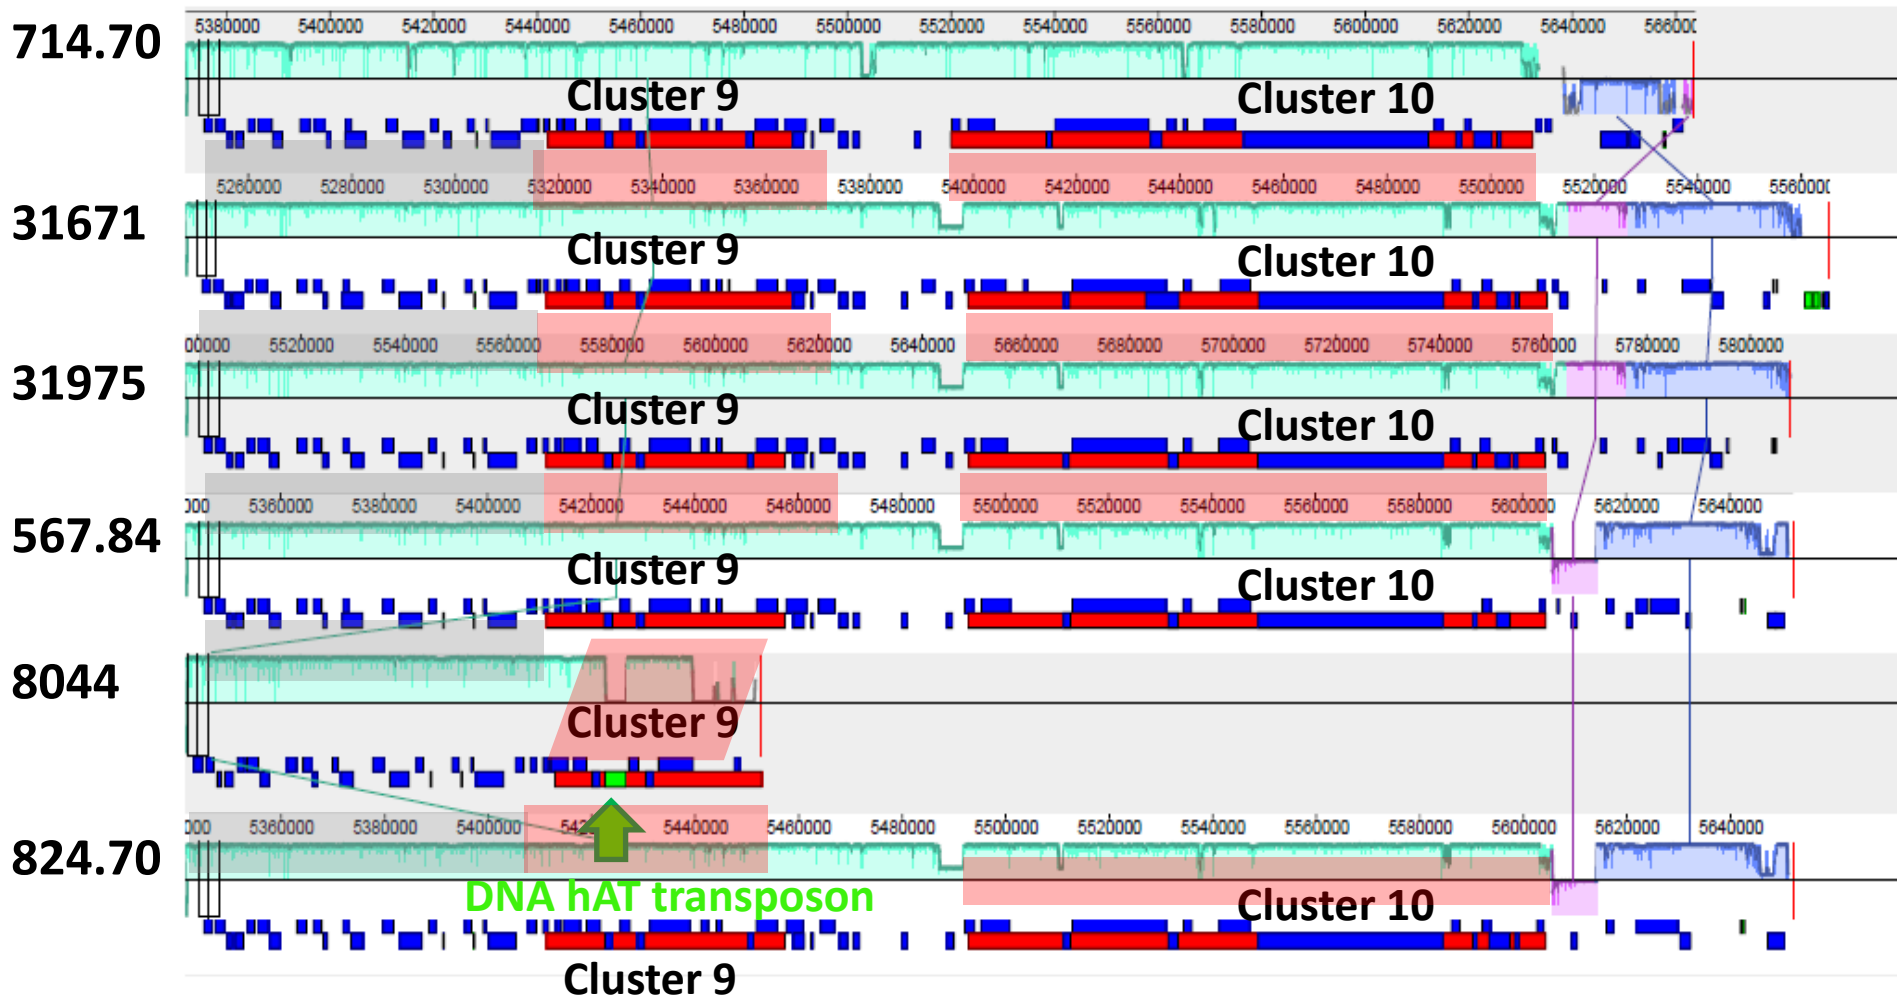

### C) Chromosome 6, Cluster 42

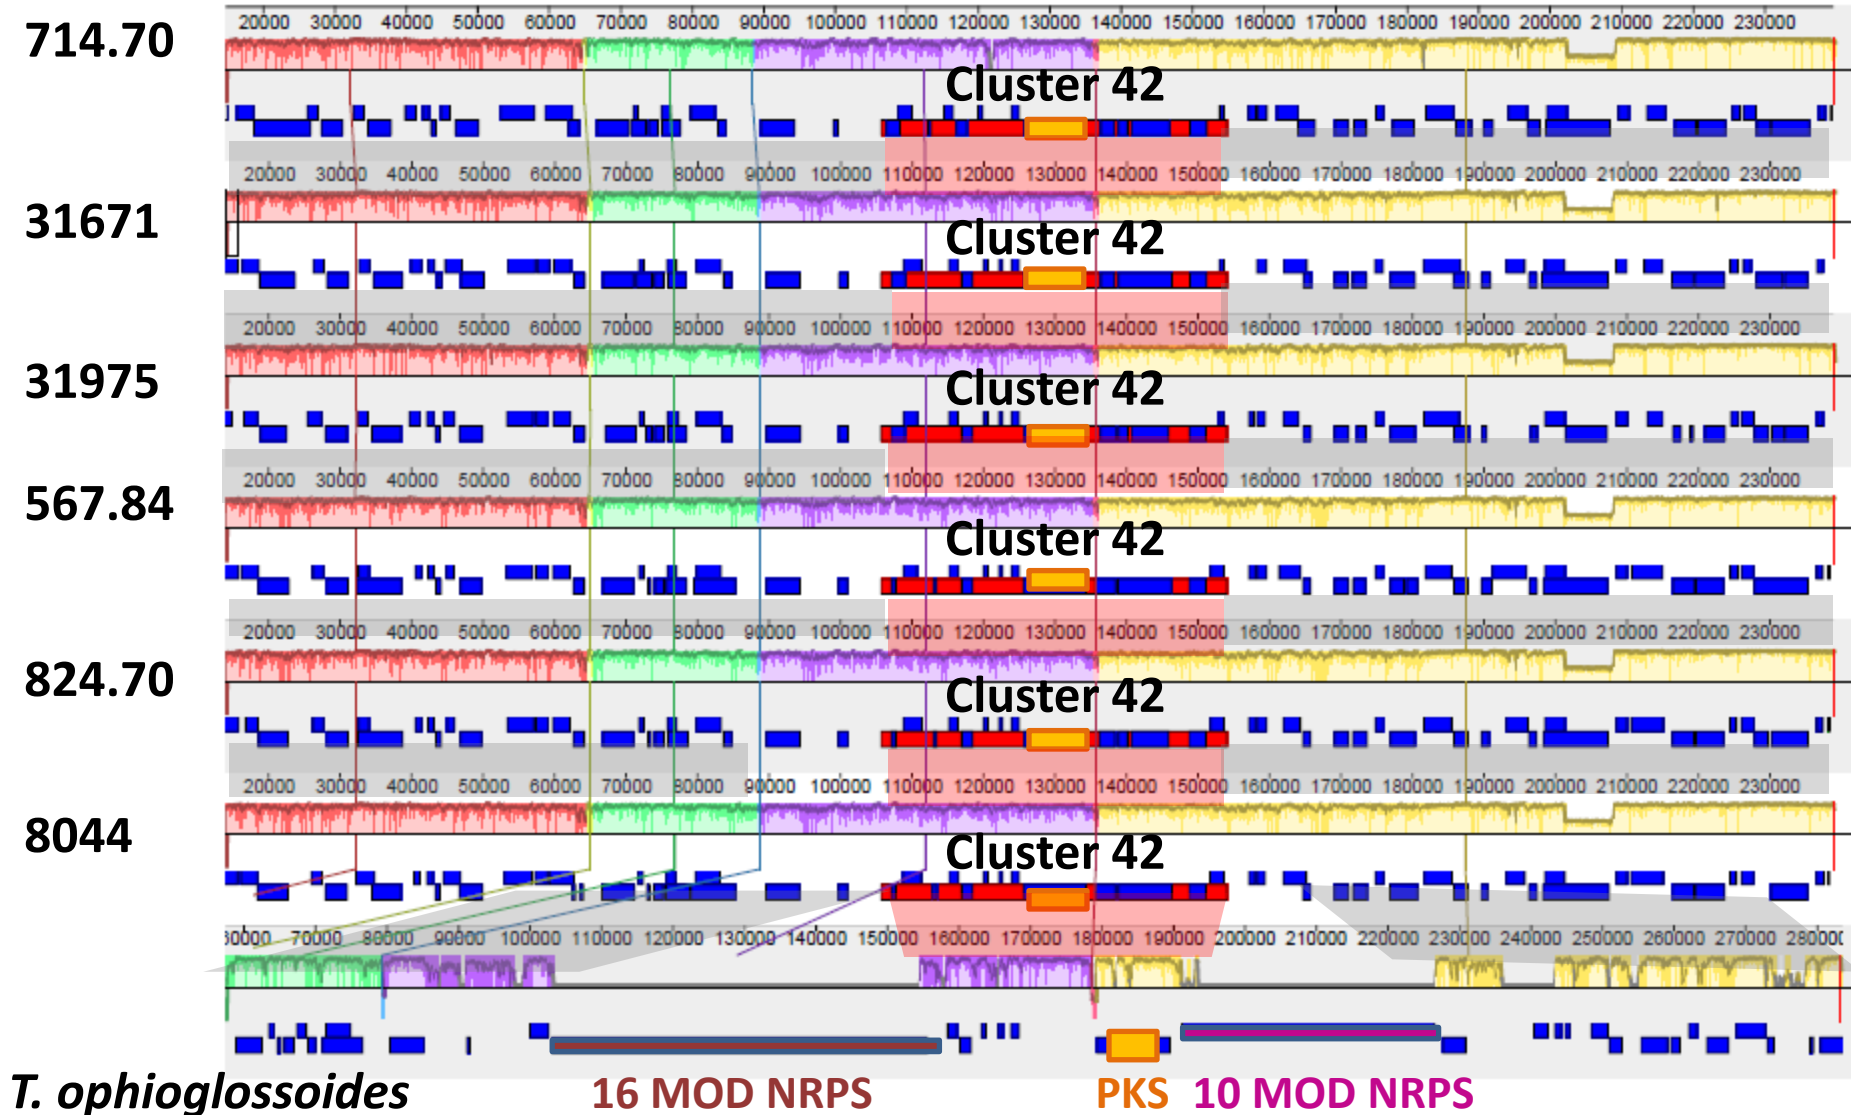

Supplement: 12864_2018_5399_MOESM16_ESM.pdf [file 12864_2018_5399_MOESM16_ESM.pdf]
