# Supplementary material for: Chromosome rearrangements shape the diversification of secondary metabolism in the cyclosporin producing fungus Tolypocladium inflatum
Source: PubMed Central journal article supplement (PMC6367777; doi:10.1186/s12864-018-5399-x), 2019-02-07
Supplement: 12864_2018_5399_MOESM18_ESM.pdf [file 12864_2018_5399_MOESM18_ESM.pdf]

**Figure 12.** Phylogenies of genes from 340 fungal proteomes clustering with individual genes in the aflatoxin-like cluster (cluster D) in *T. inflatum* strain CBS567.84 and CBS824.70. Phylogenies were constructed using maximum likelihood criteria implemented in RAxML using the best fit model of amino acid substitution using Bayesian Information Criterion and 100 bootstrap replicates. The cluster genes in *T. inflatum* strains are highlighted in red and a key to abbreviations for other fungal taxa is included at the end of the supplement.

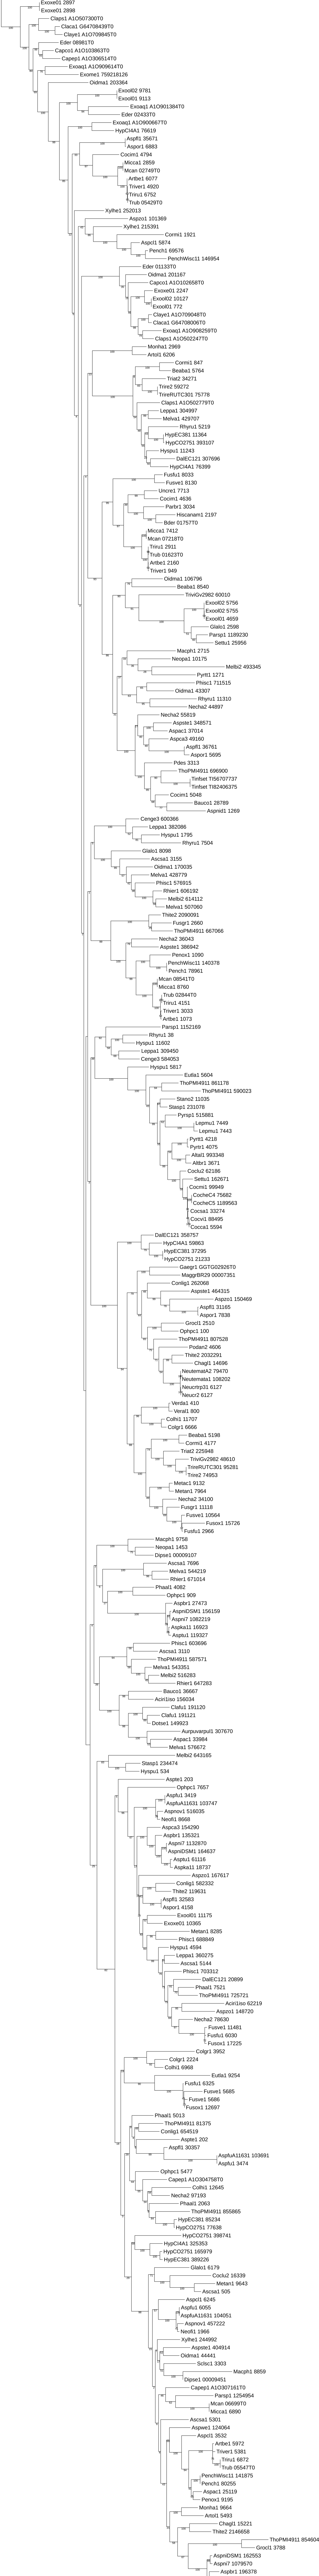

**TINF07738**

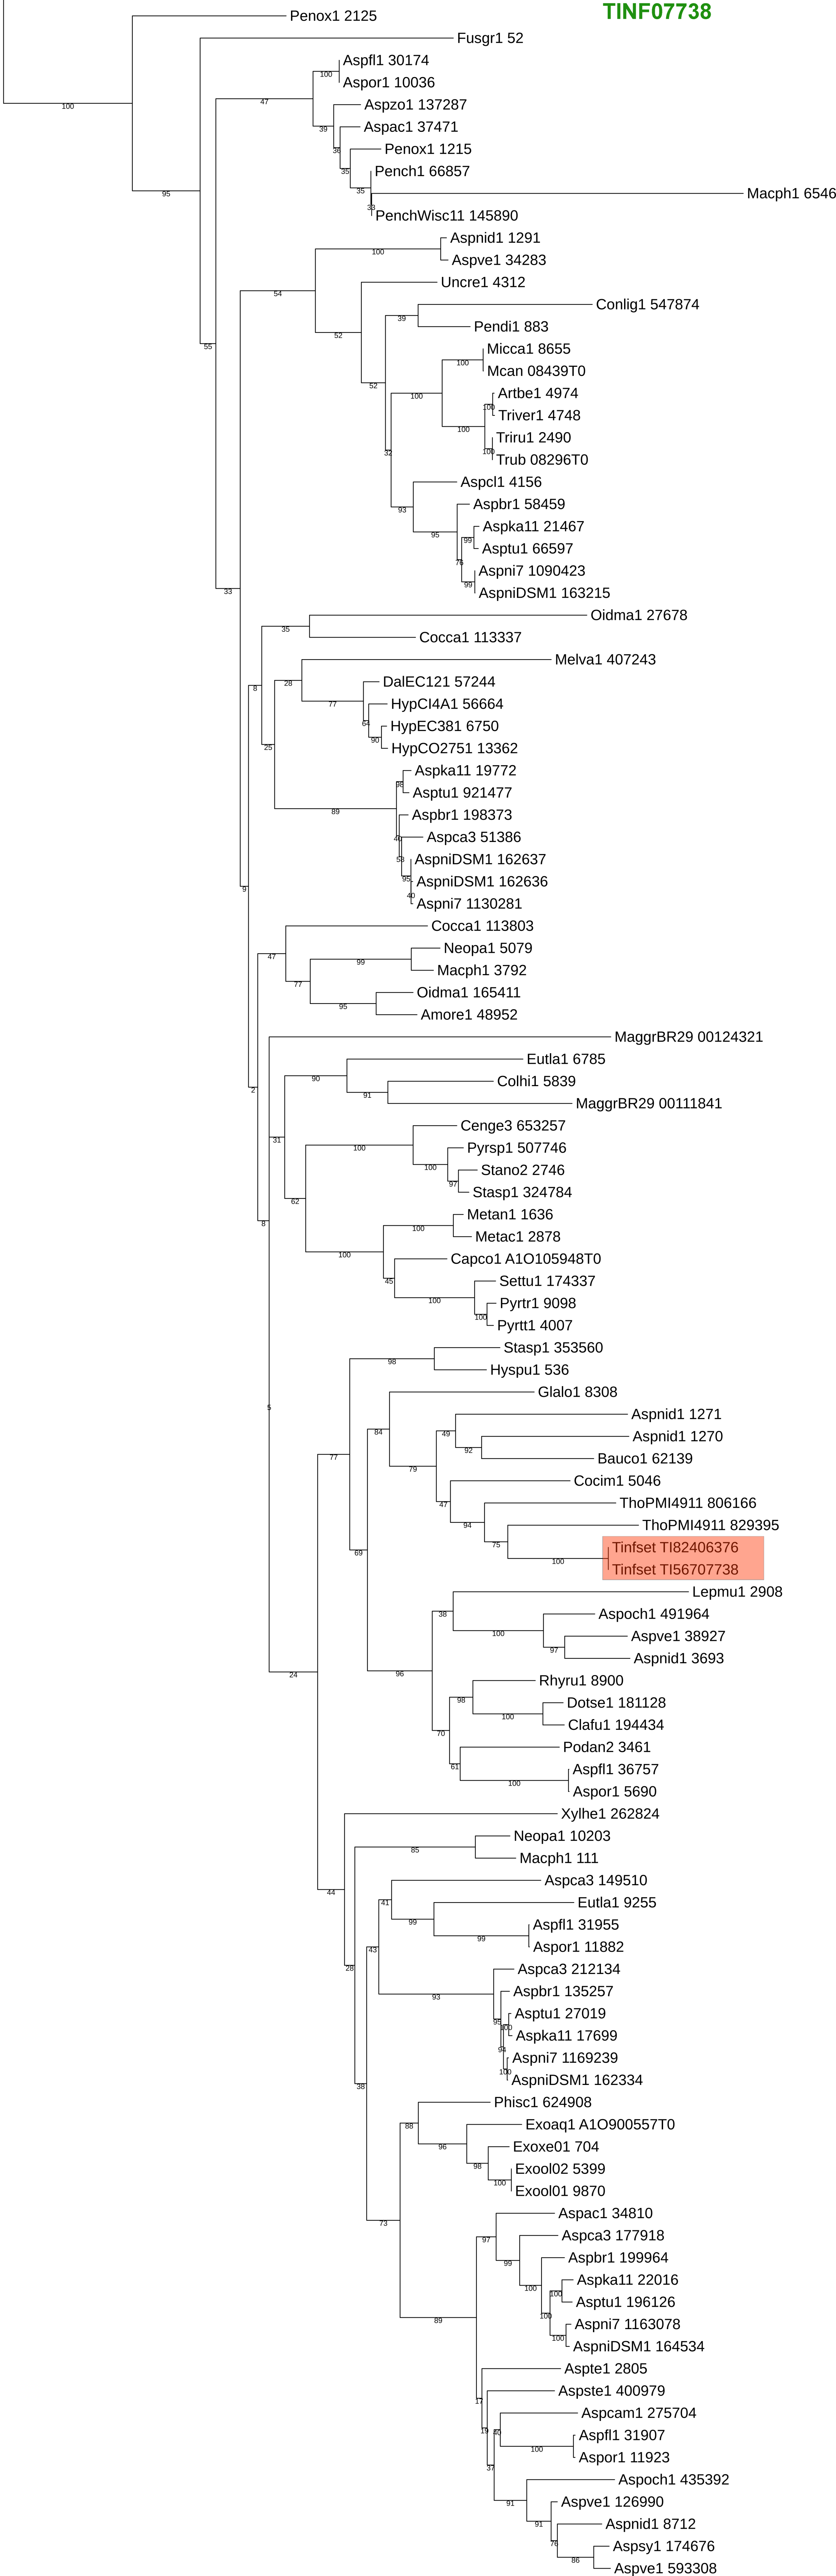

tree scale: 0.1  
HypCI4A1 19015

TINF0039

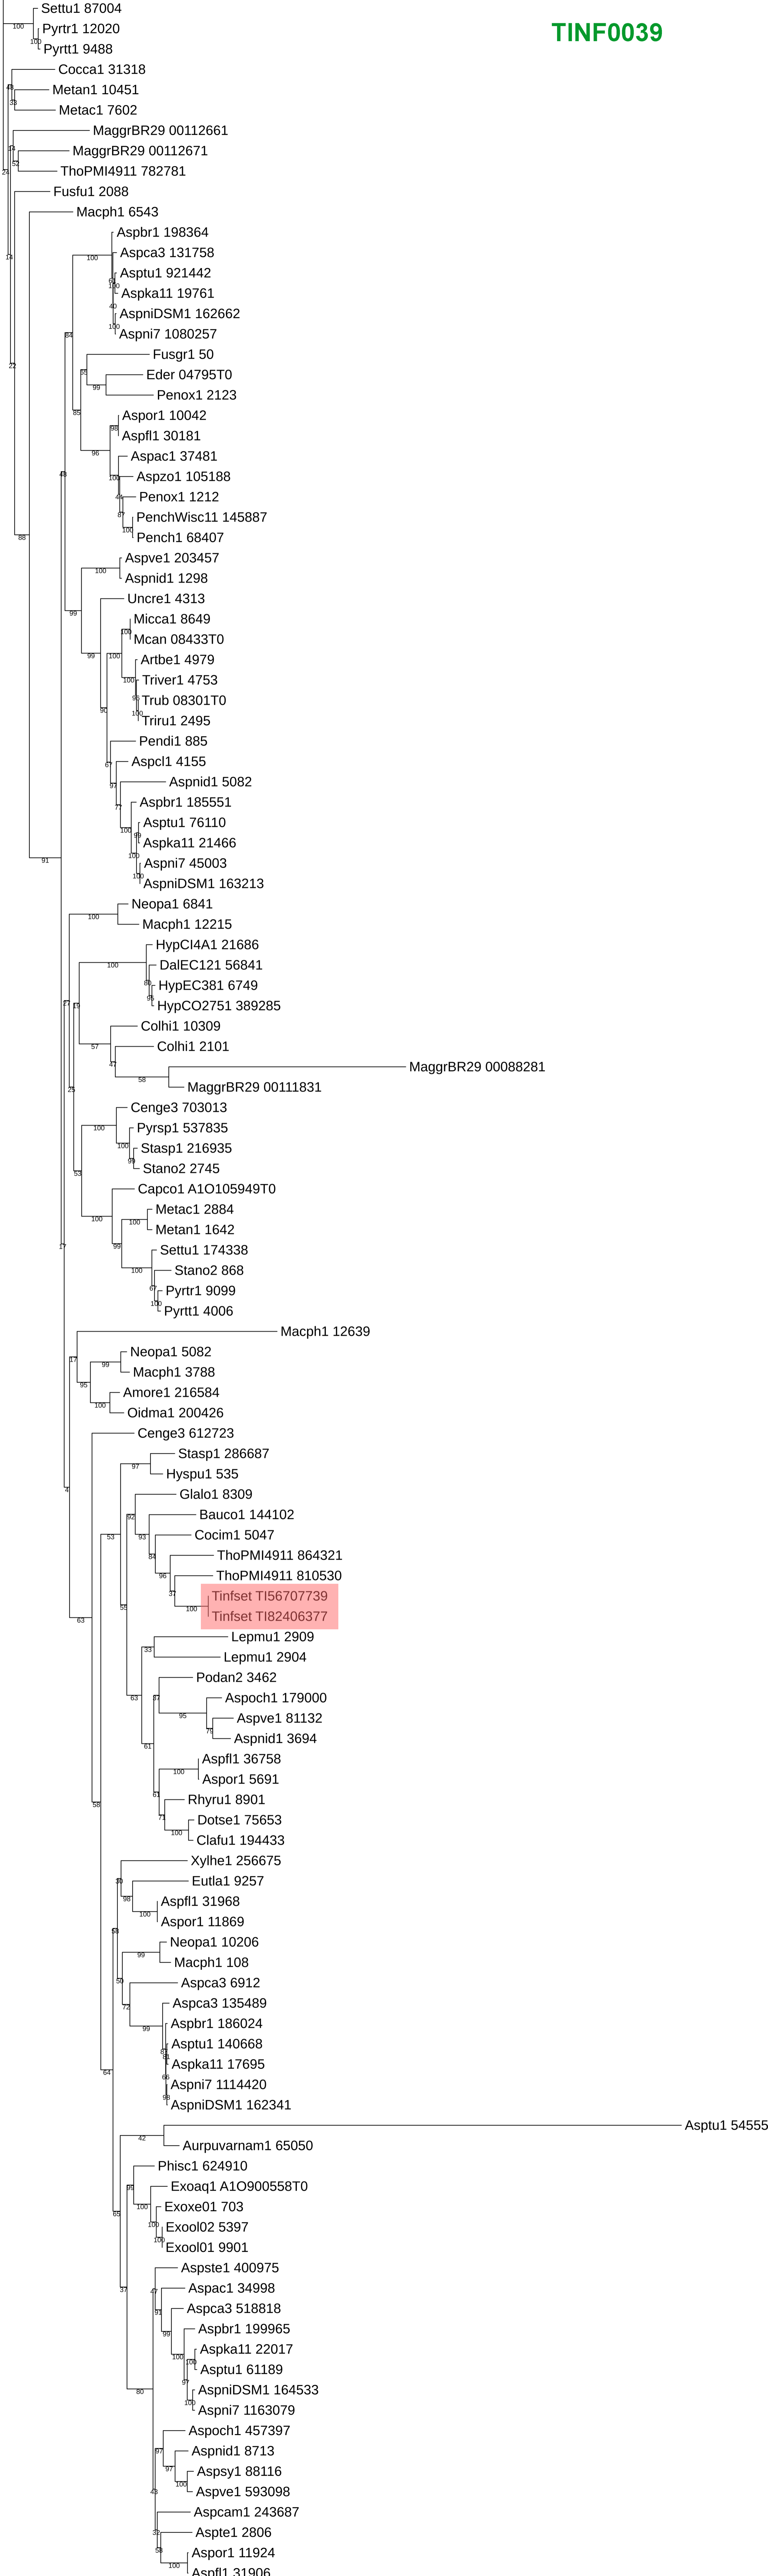

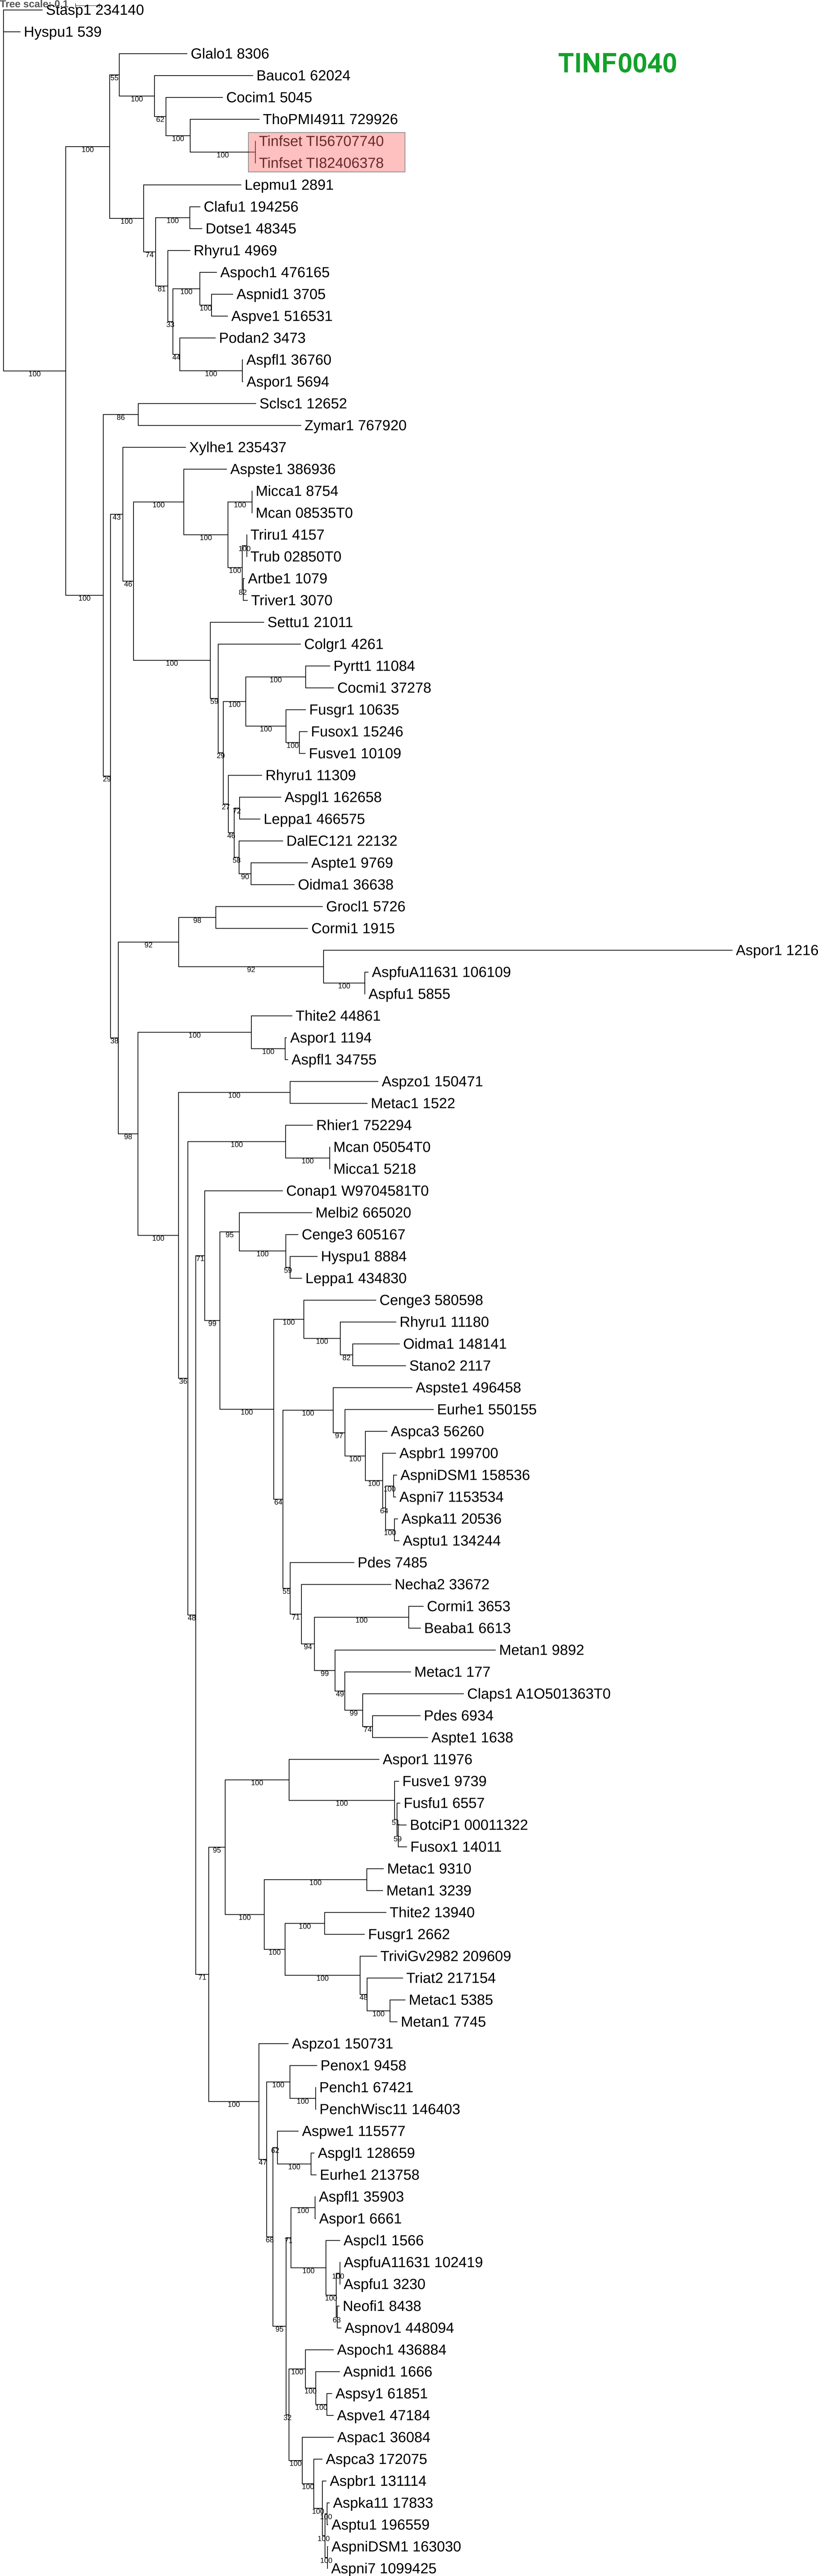

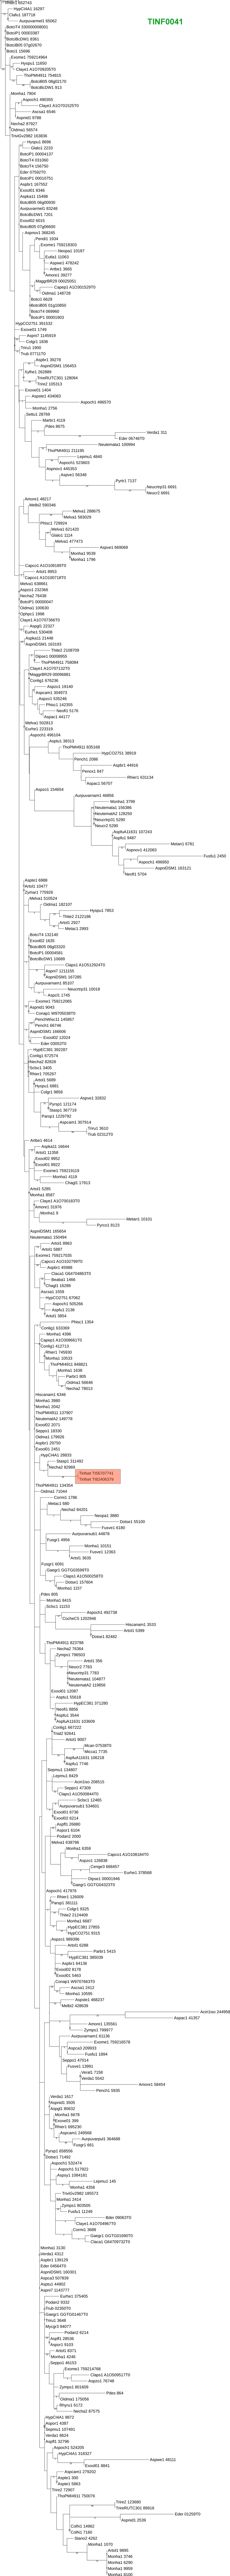

# TINF07742

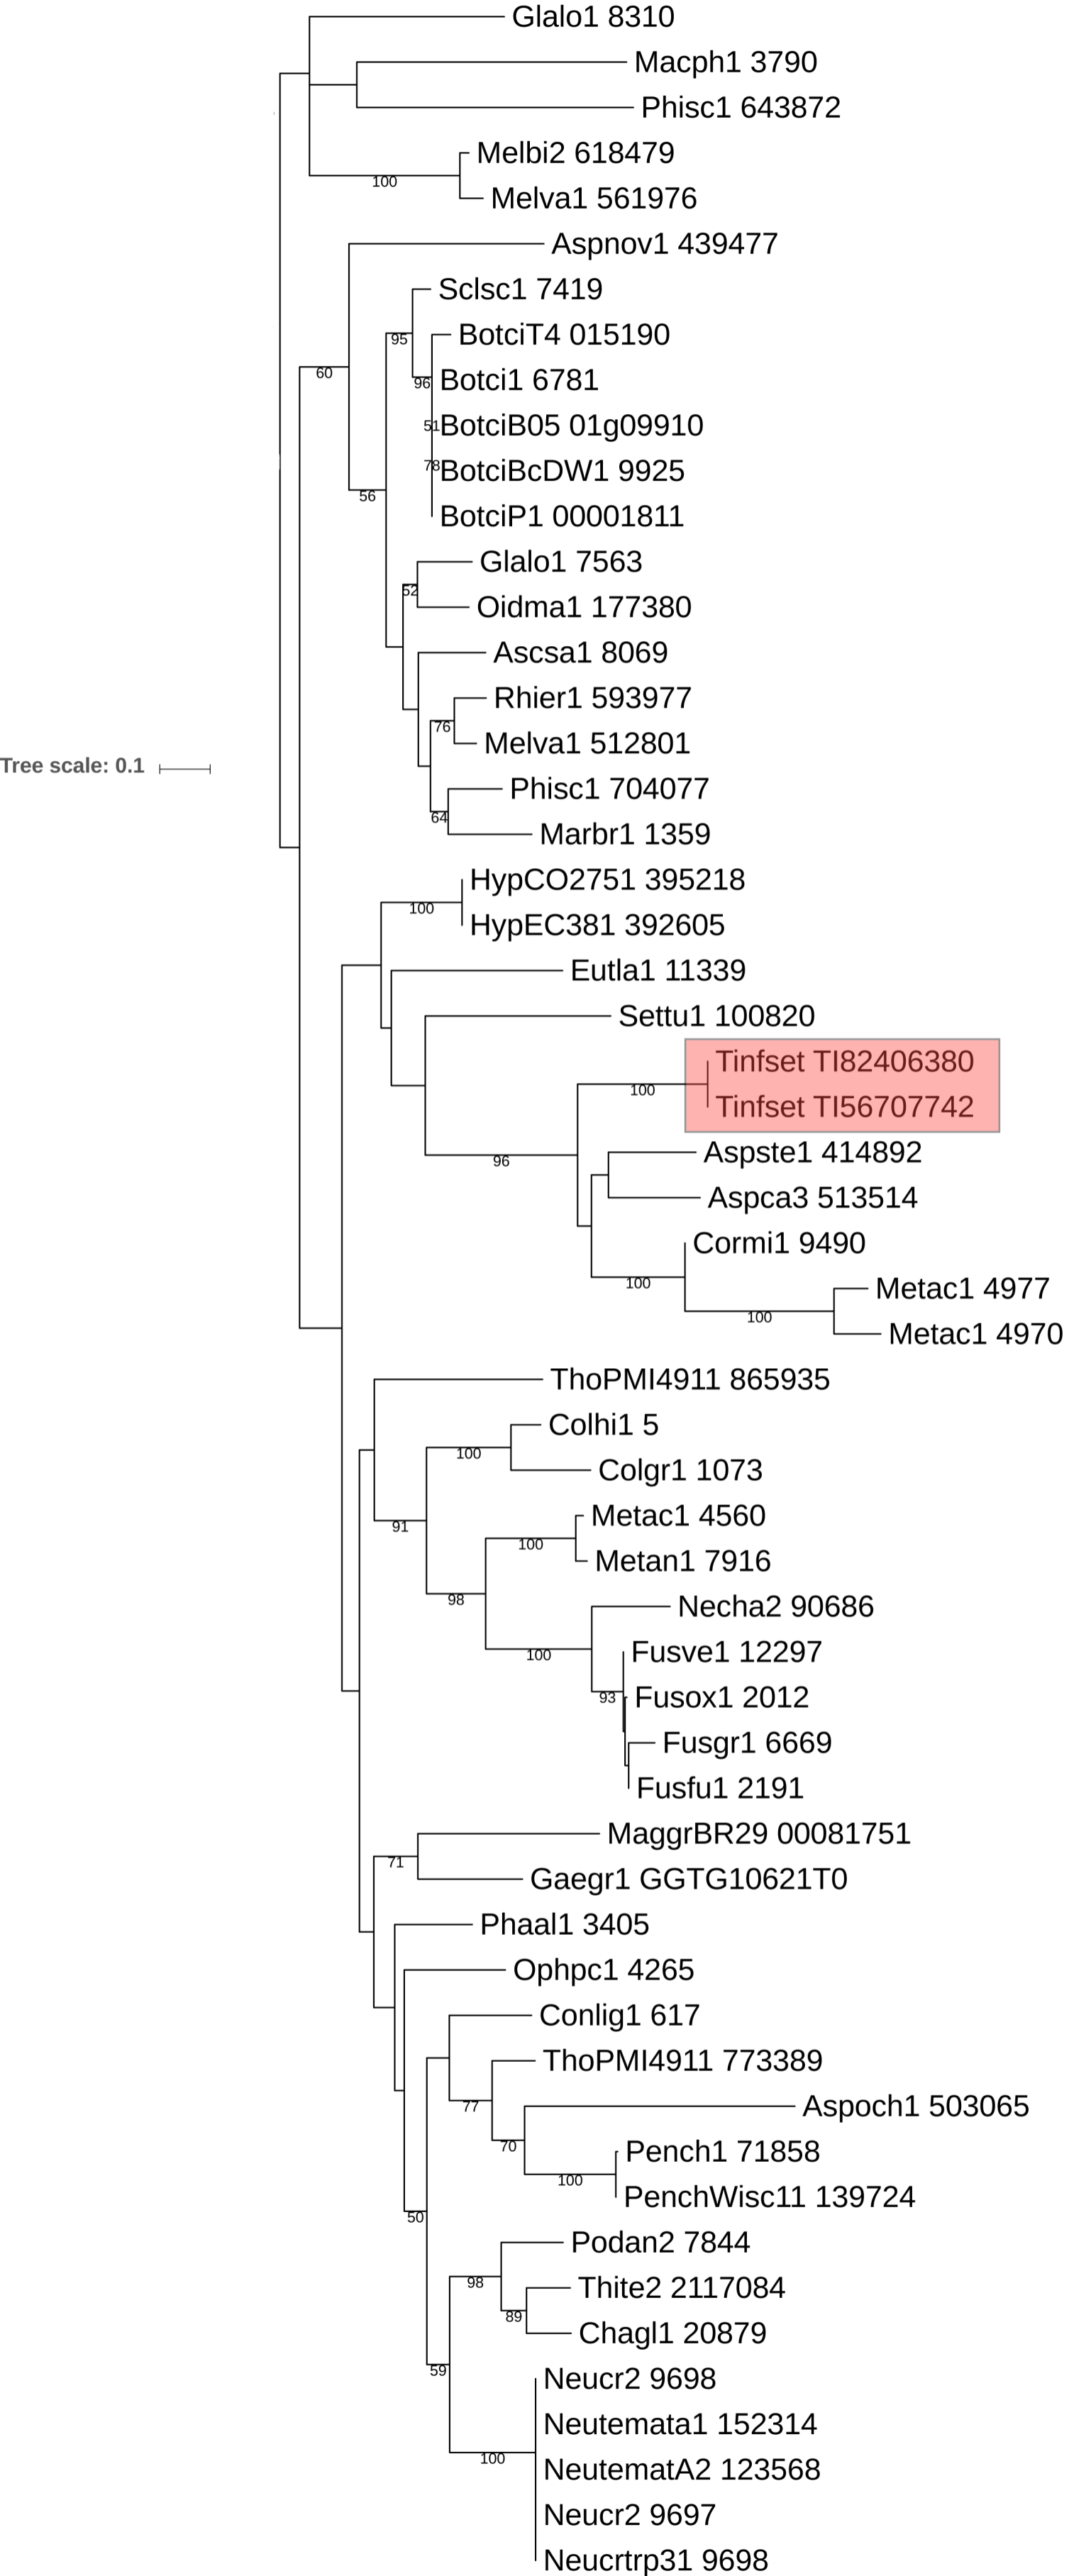

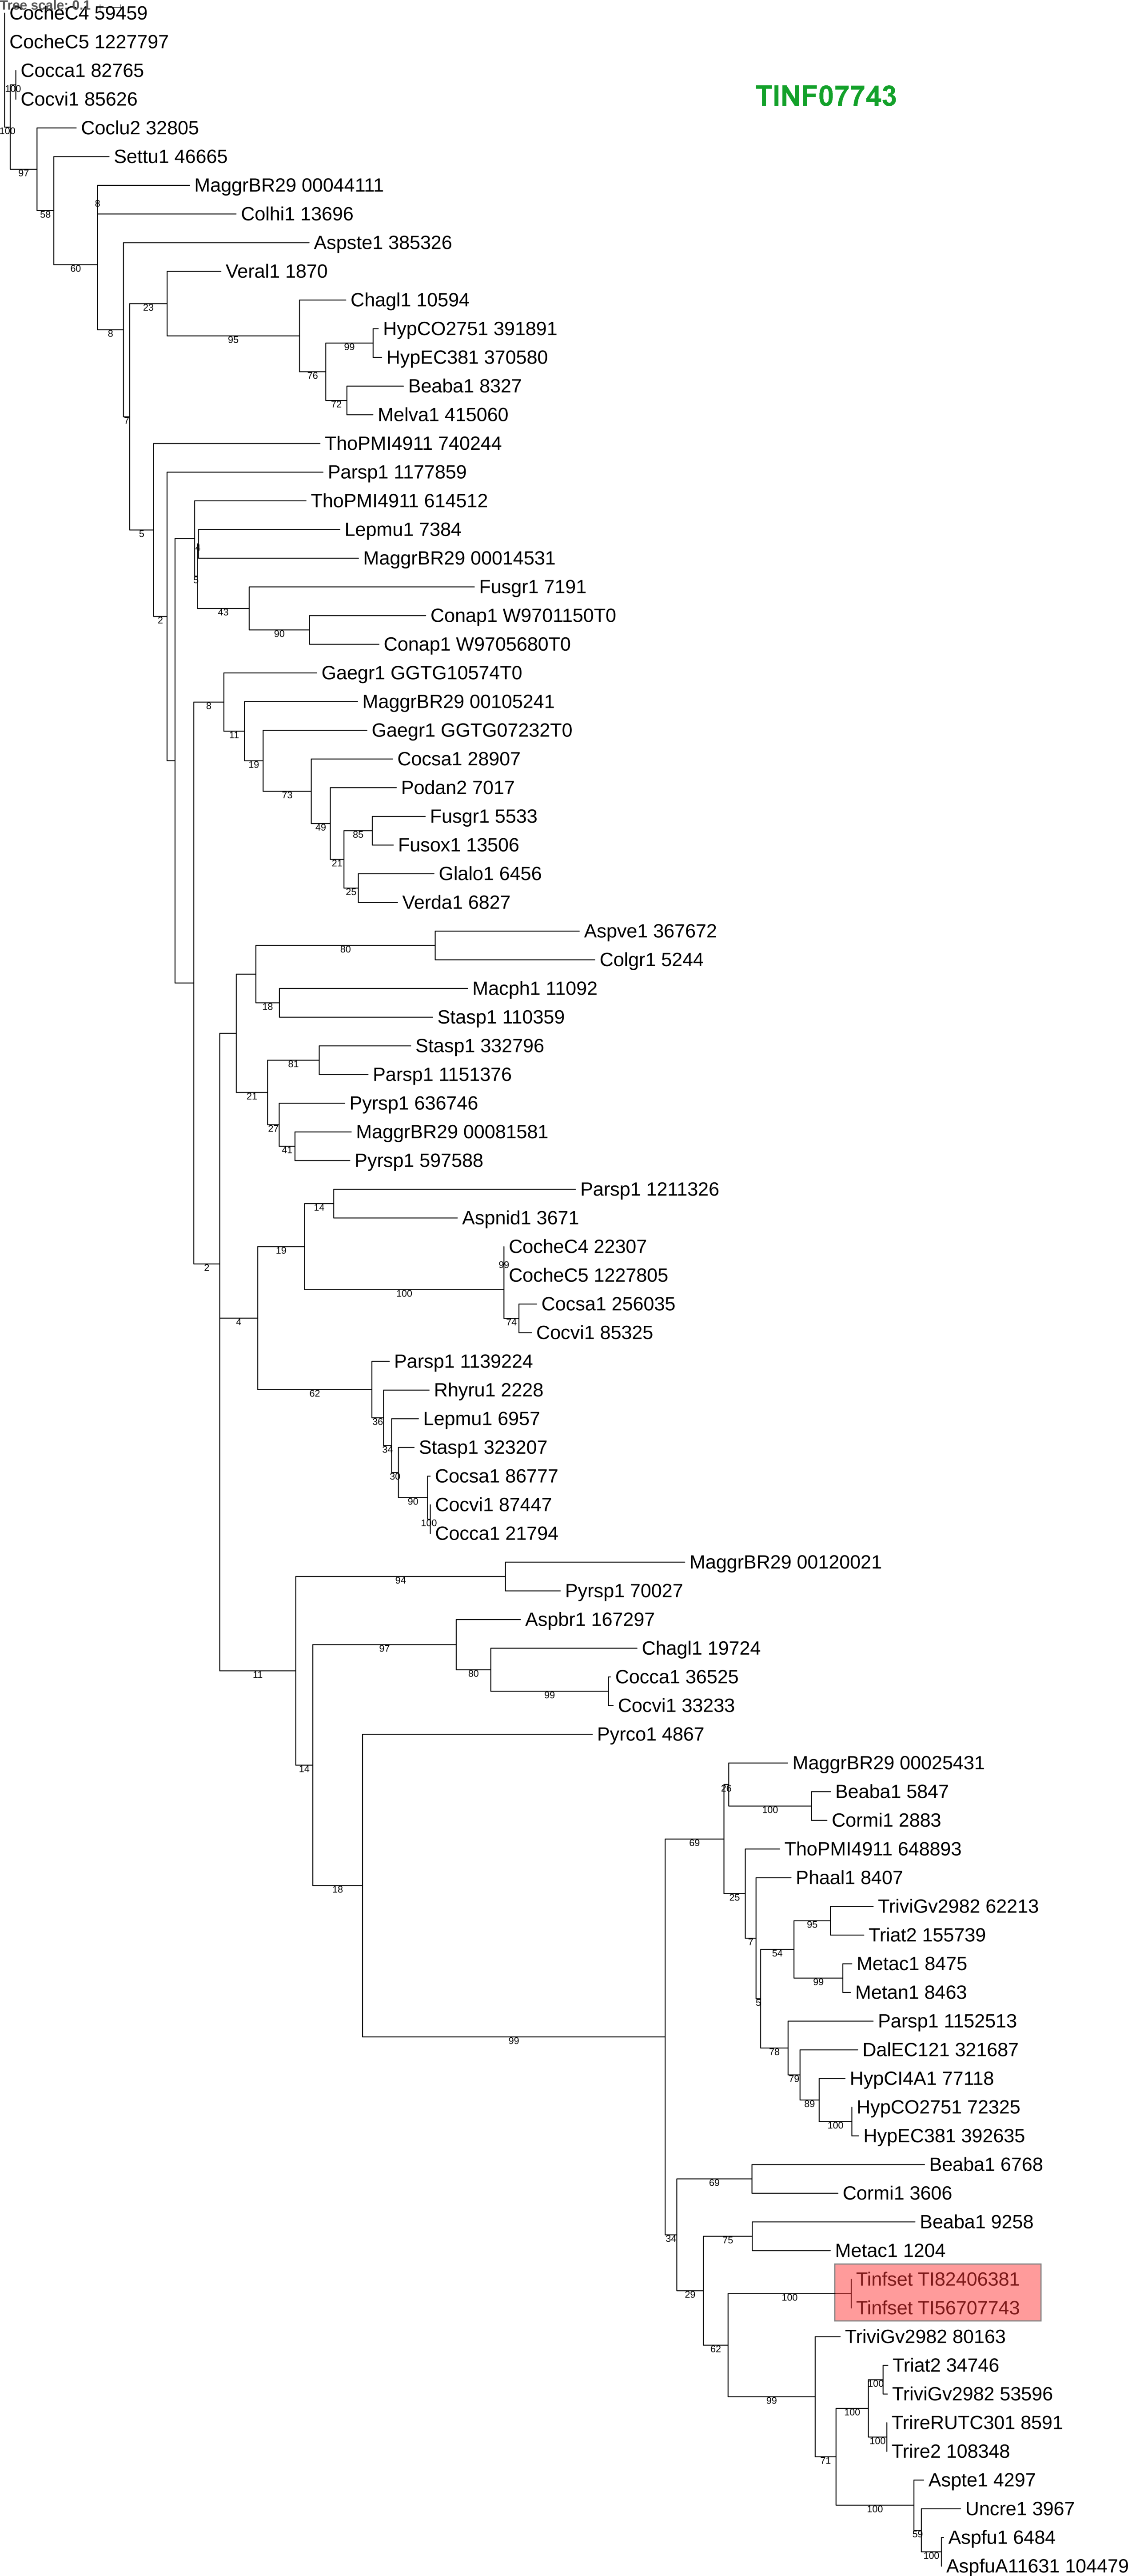

scale: 0.1

TINF0044

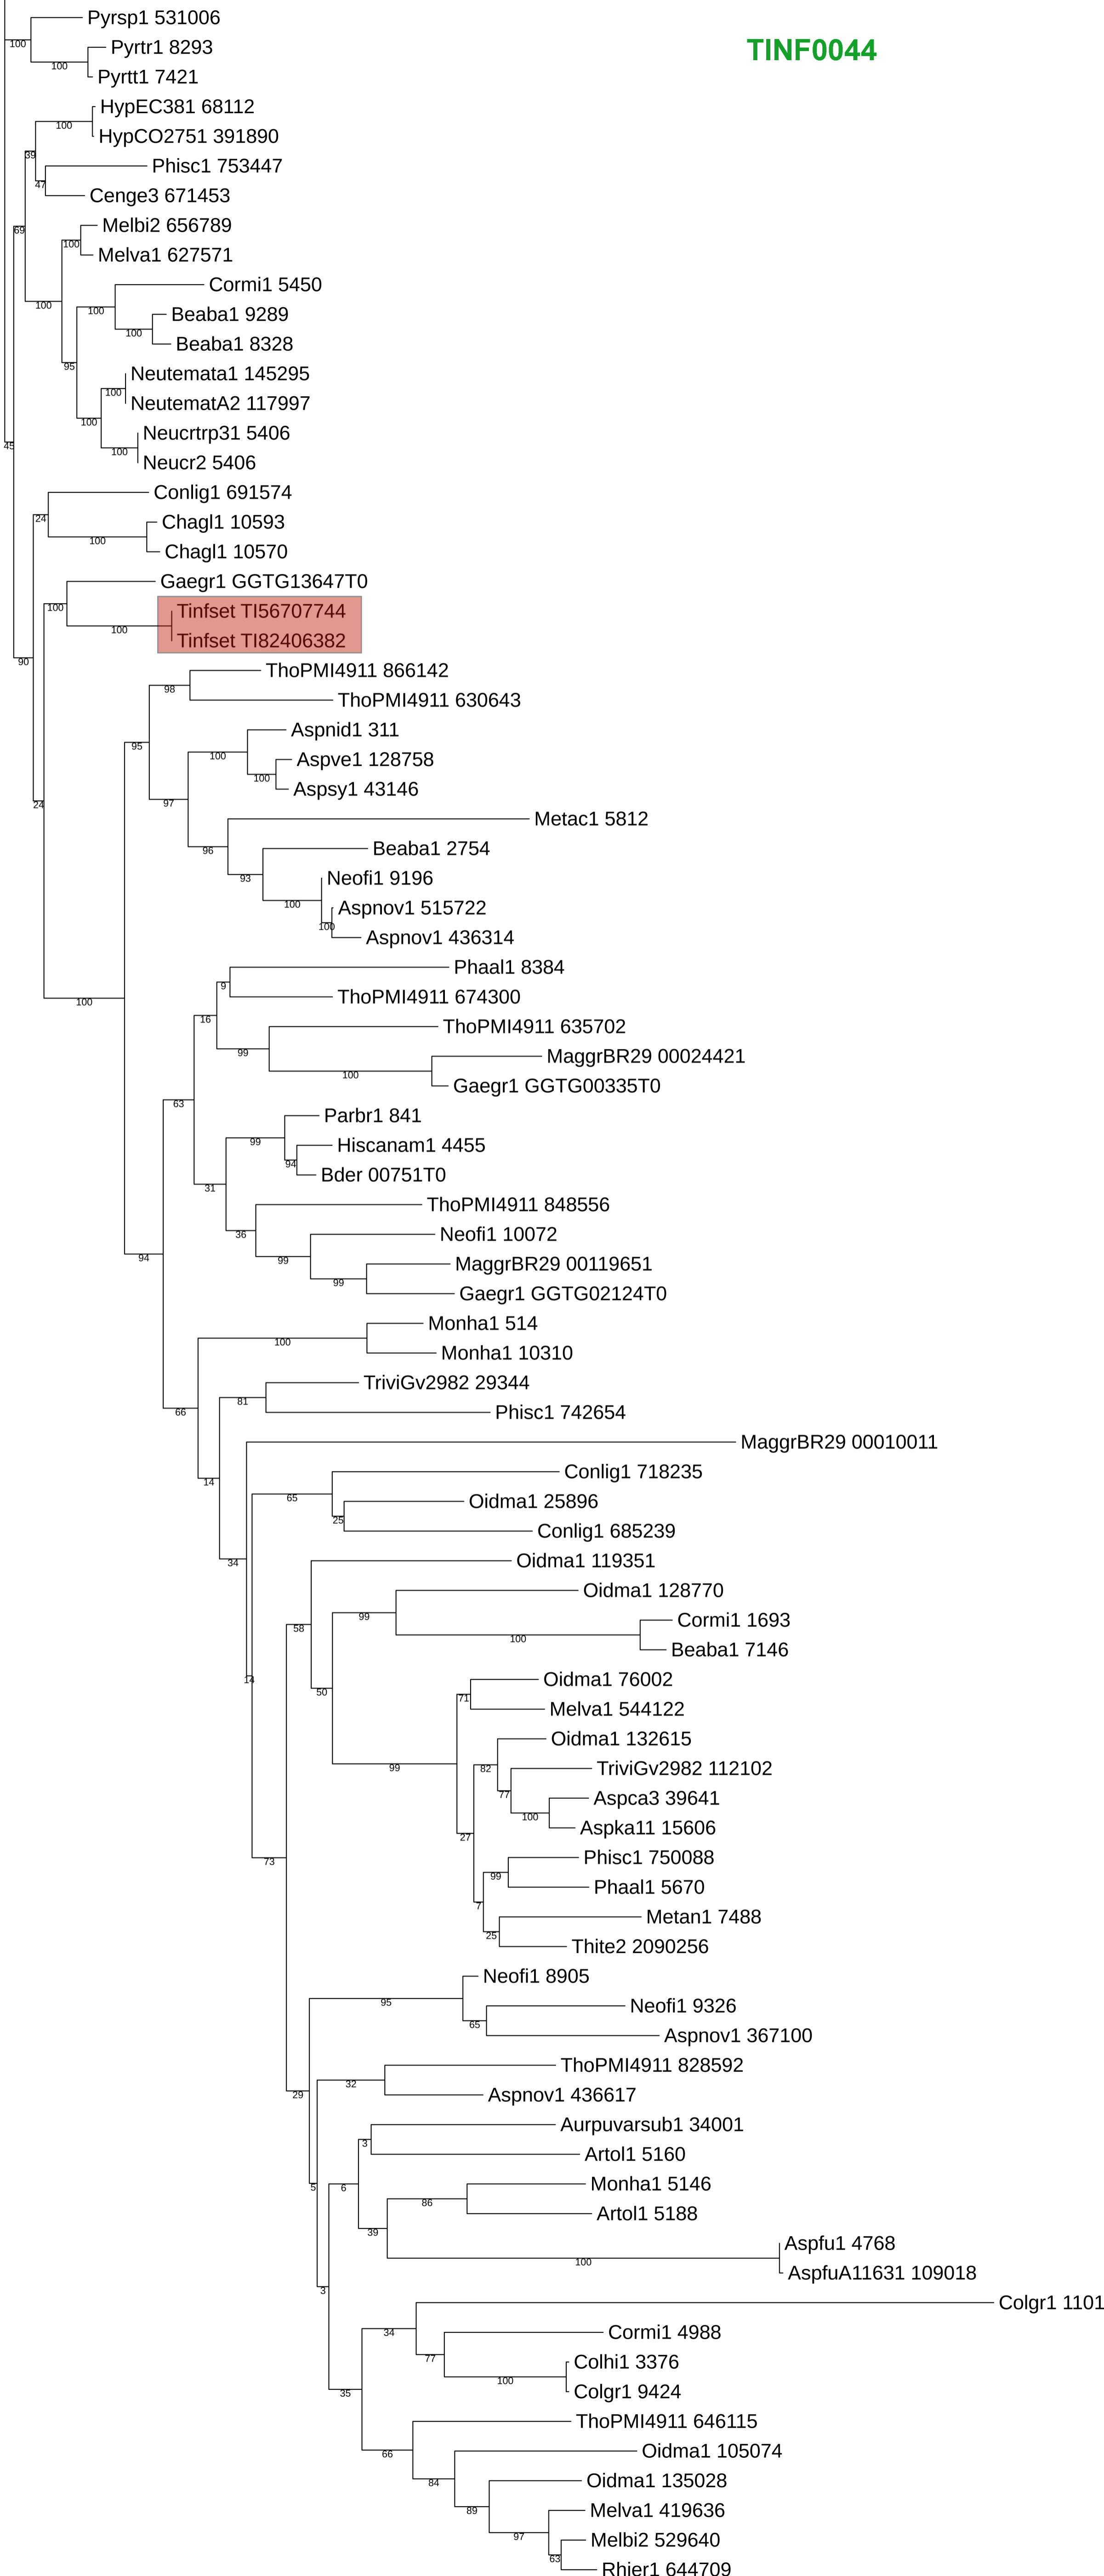



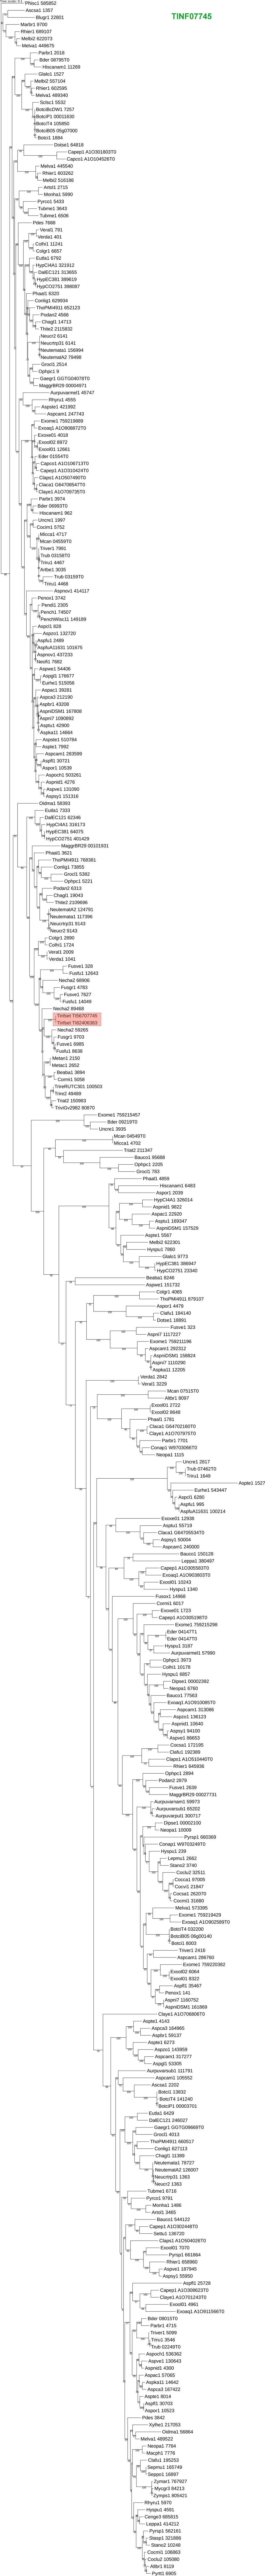

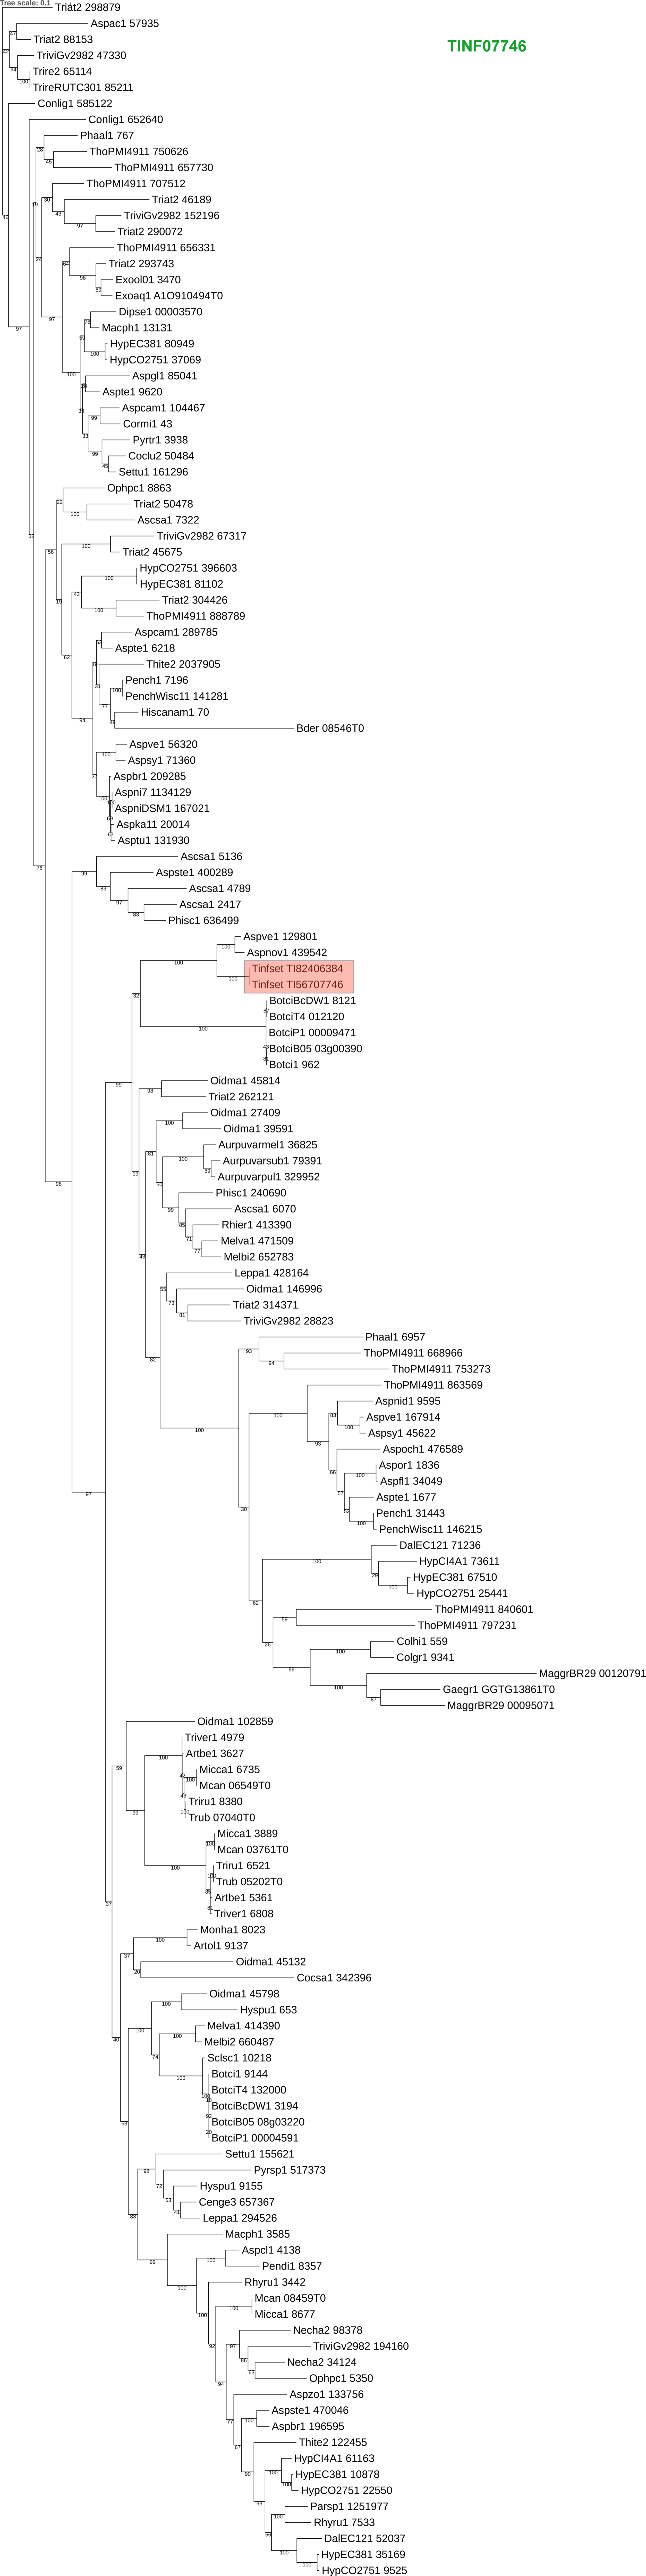

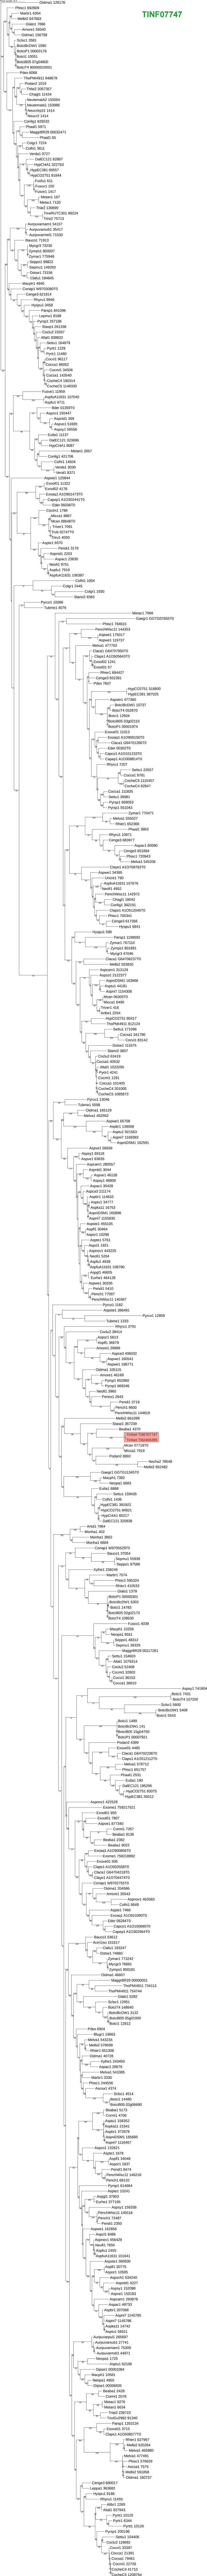

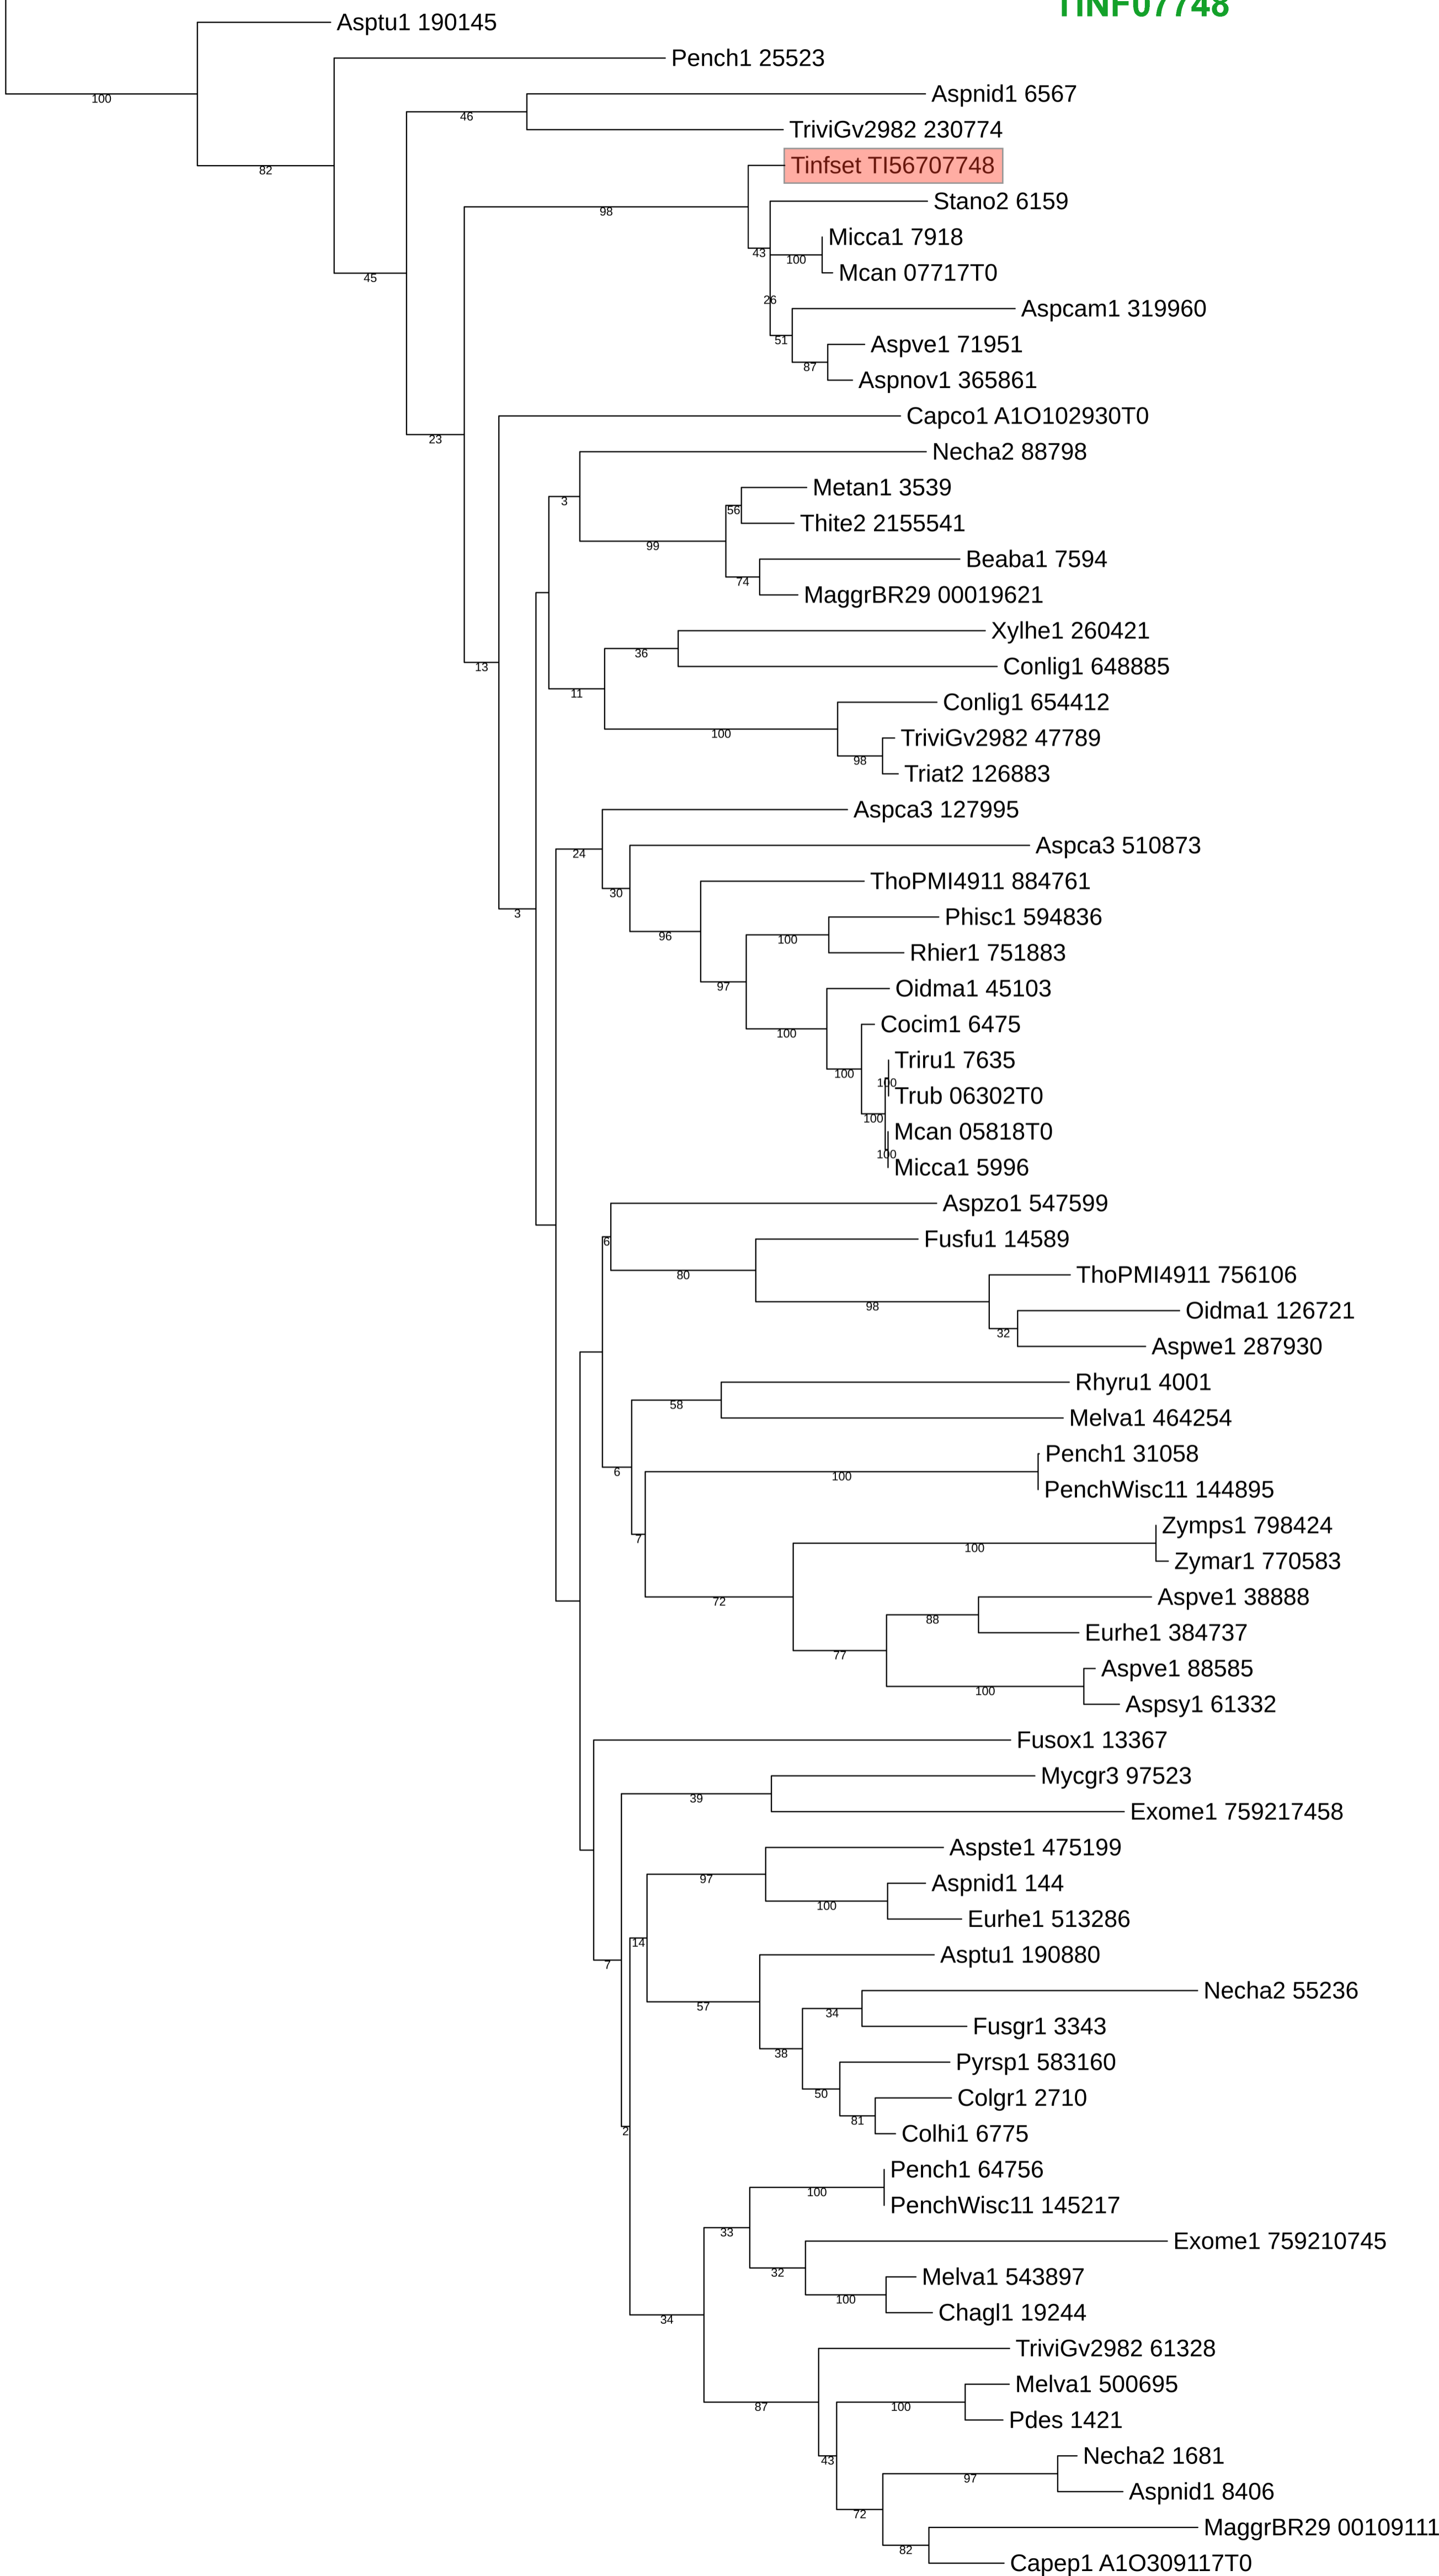

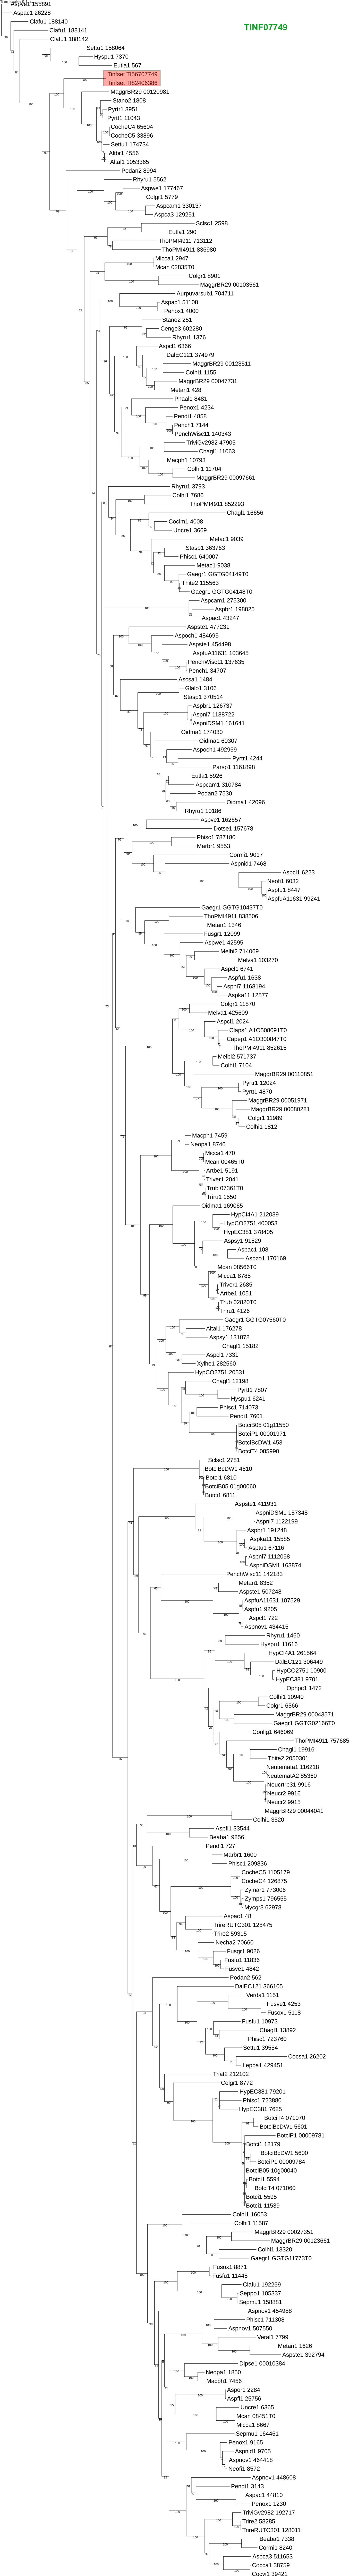

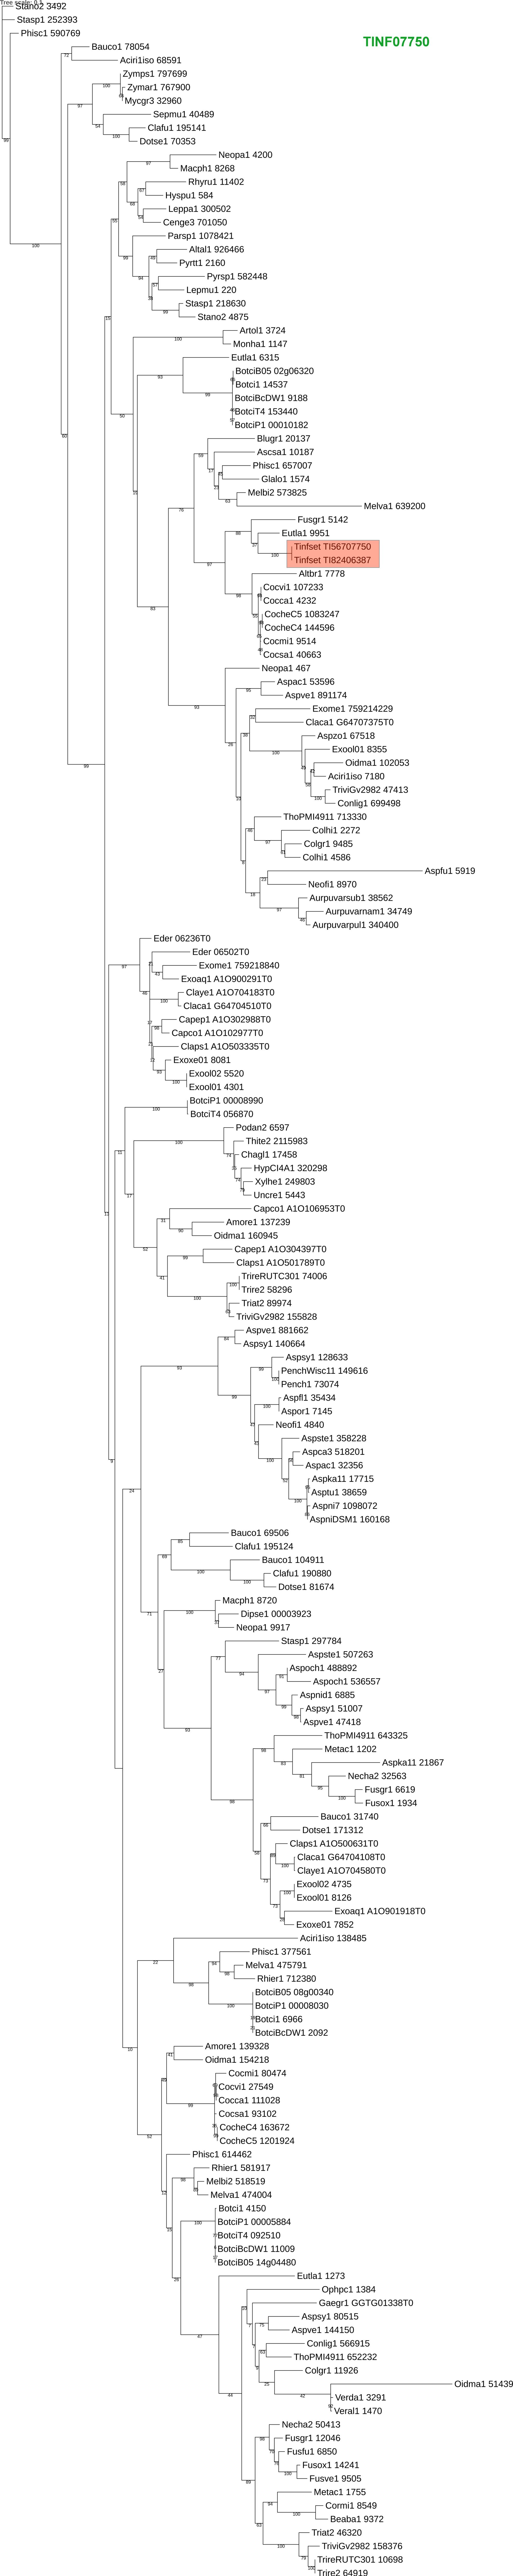

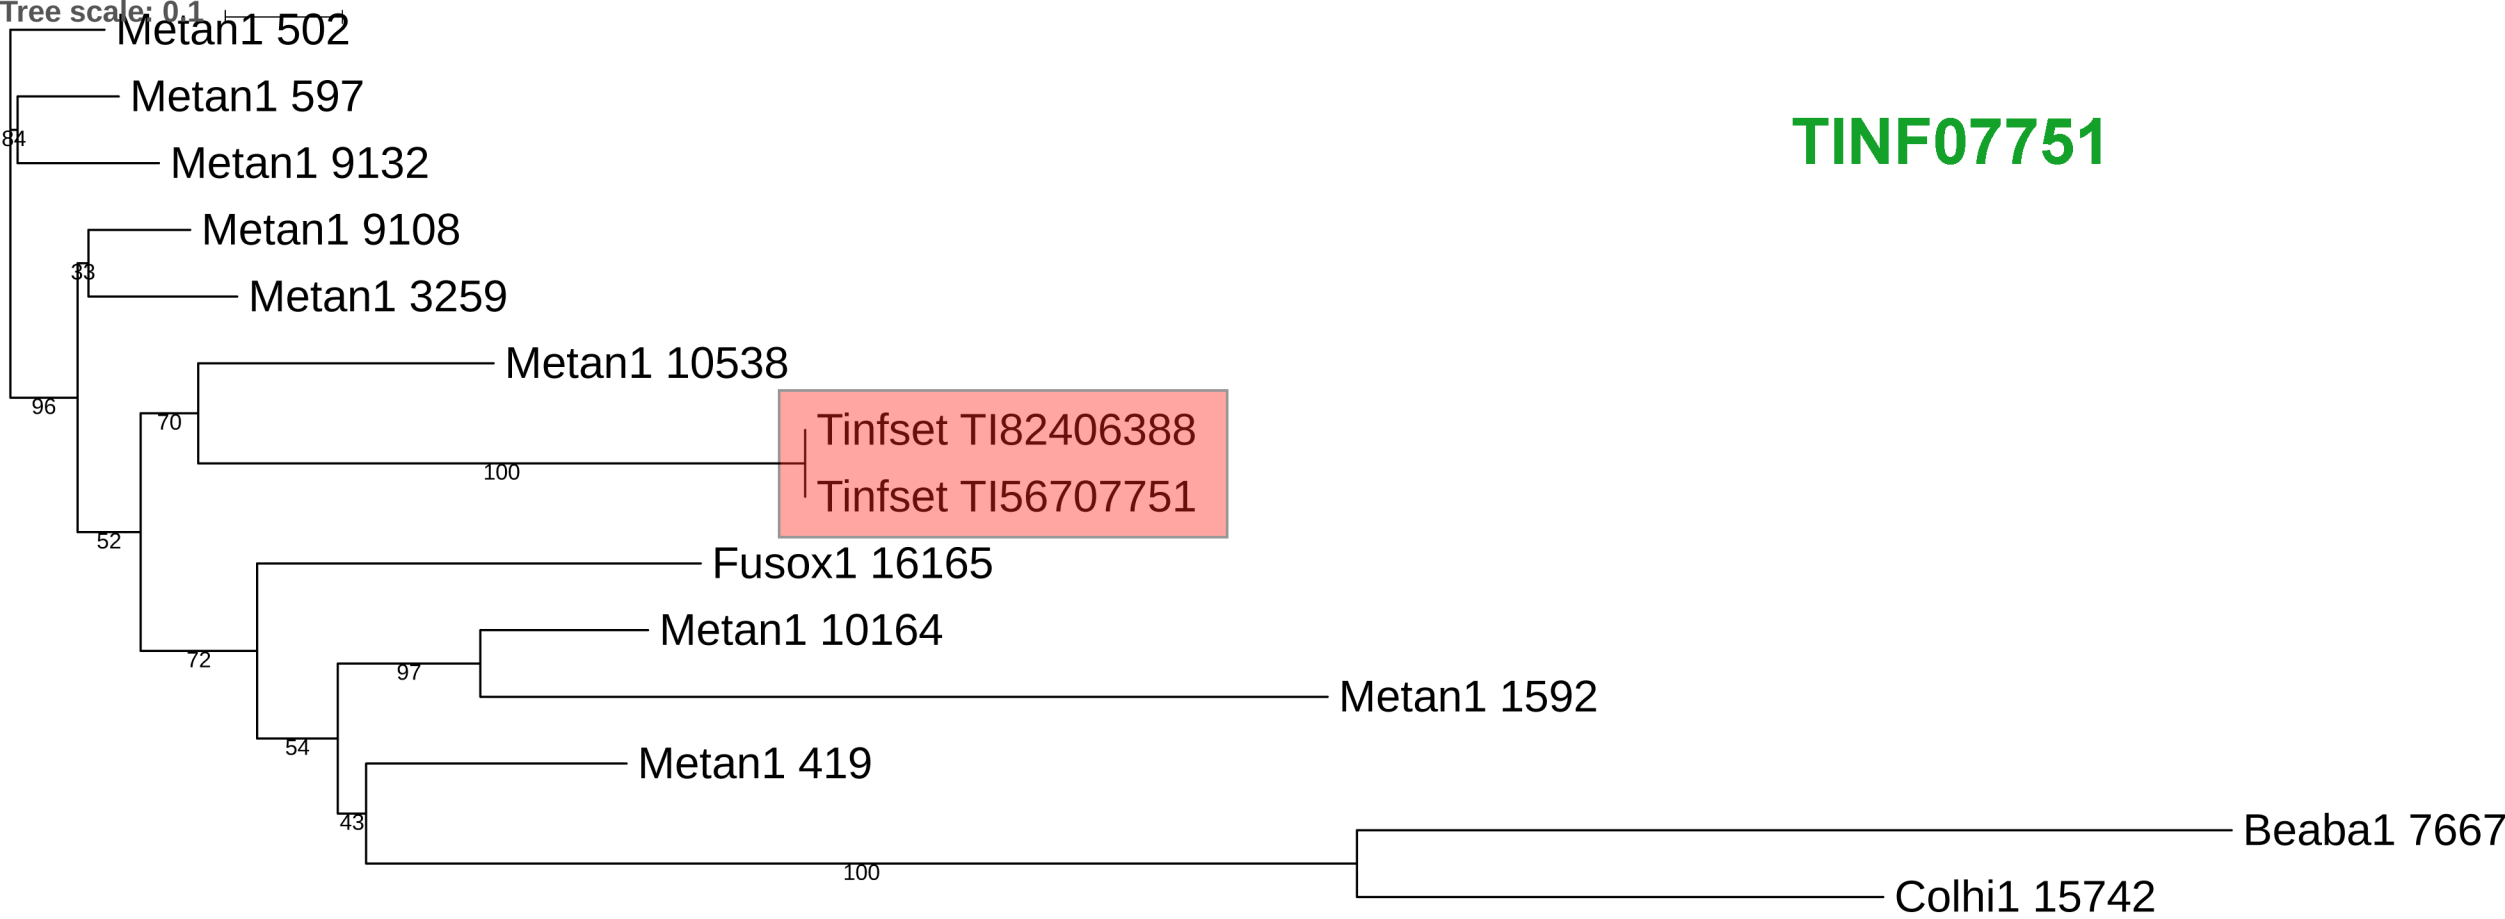

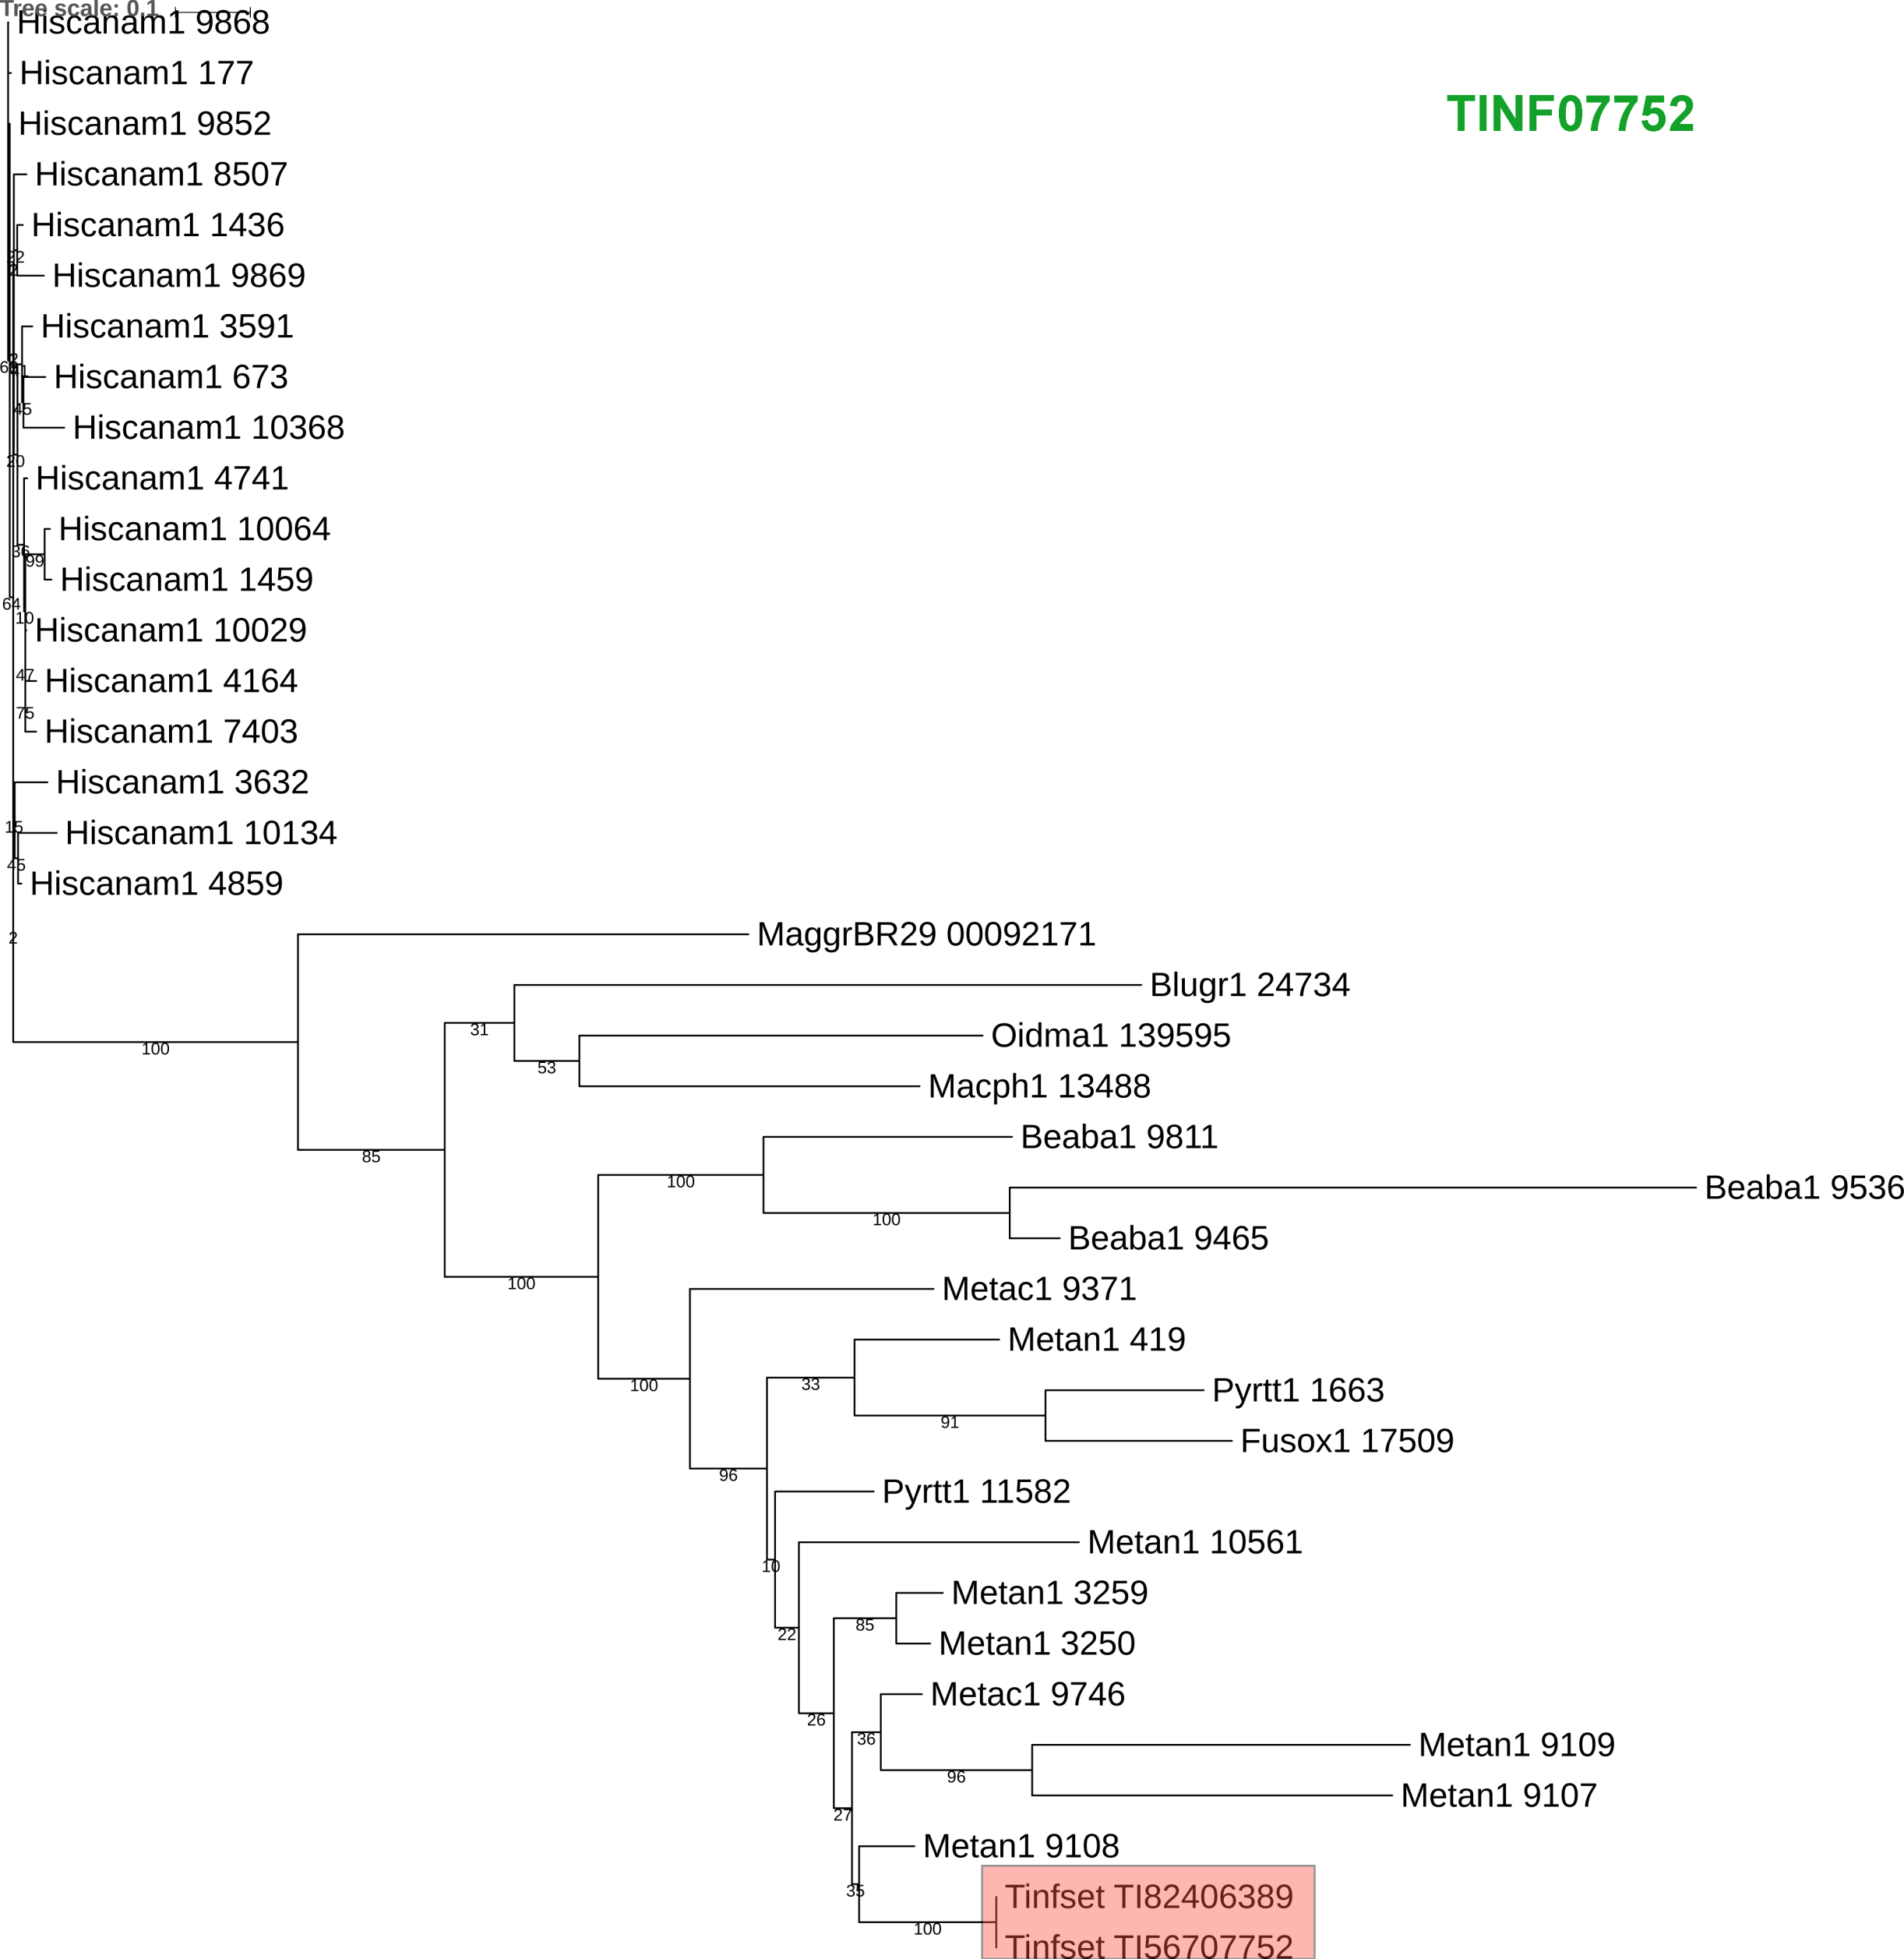



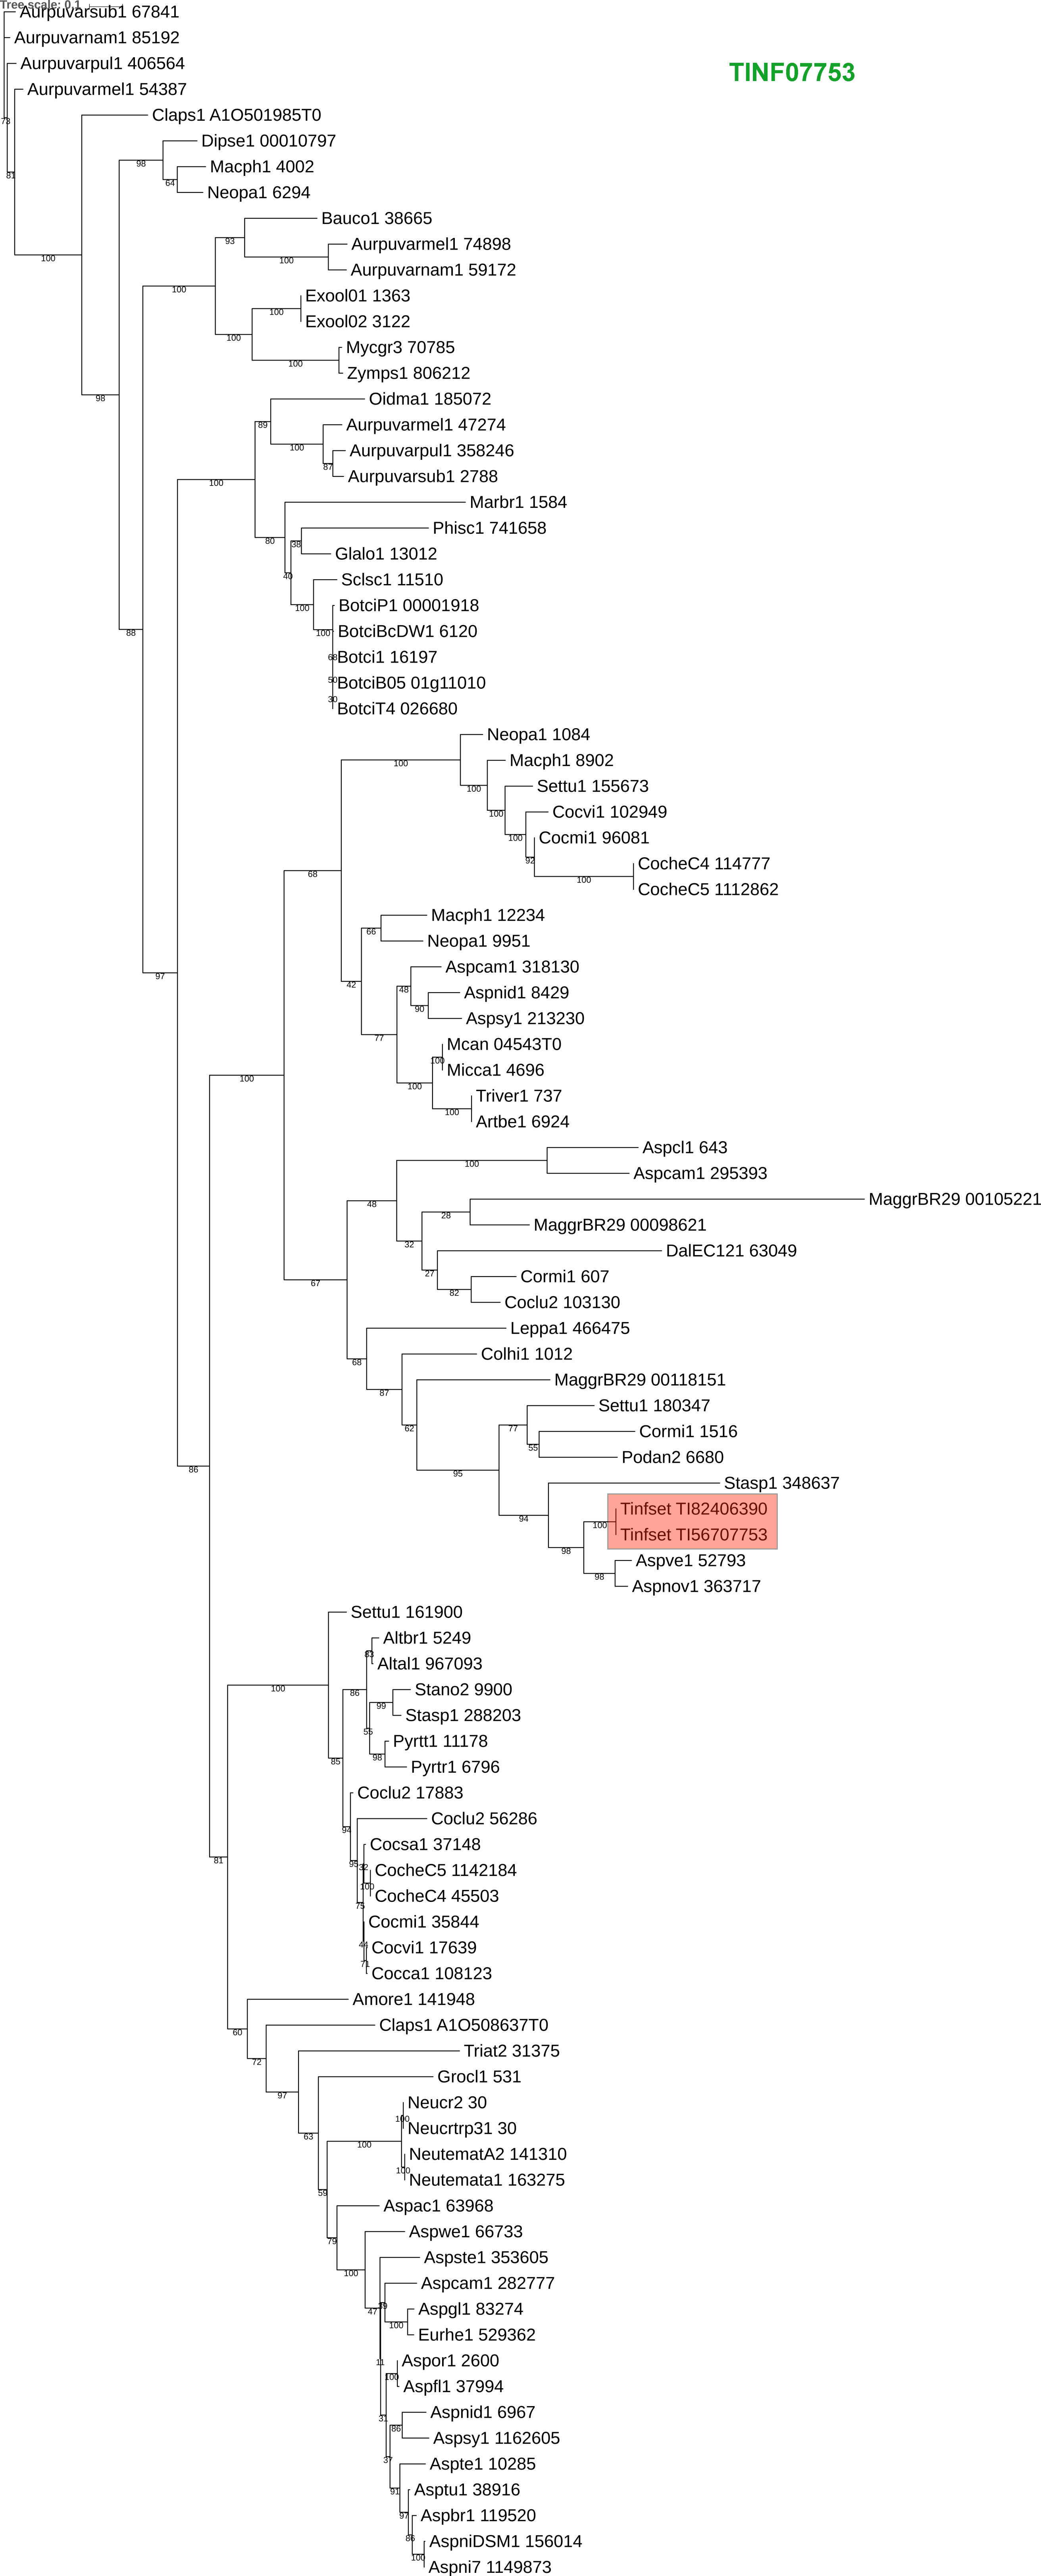

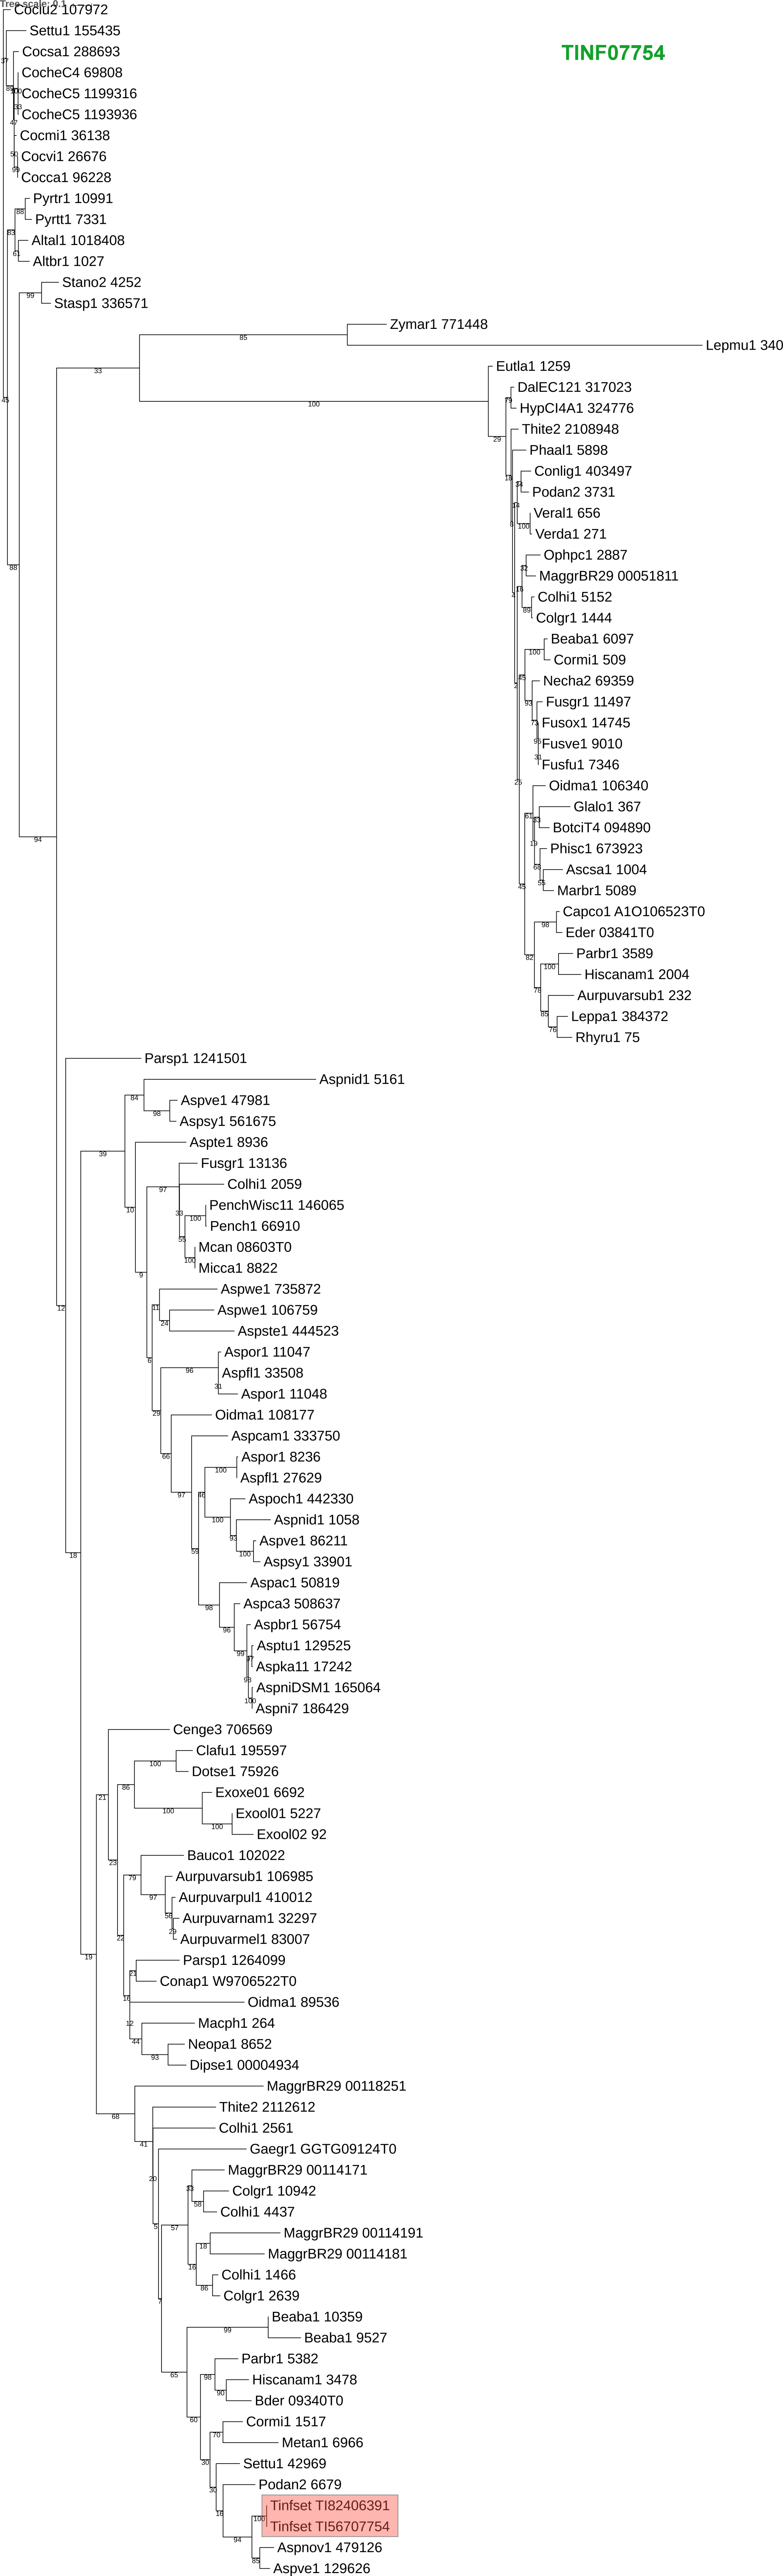

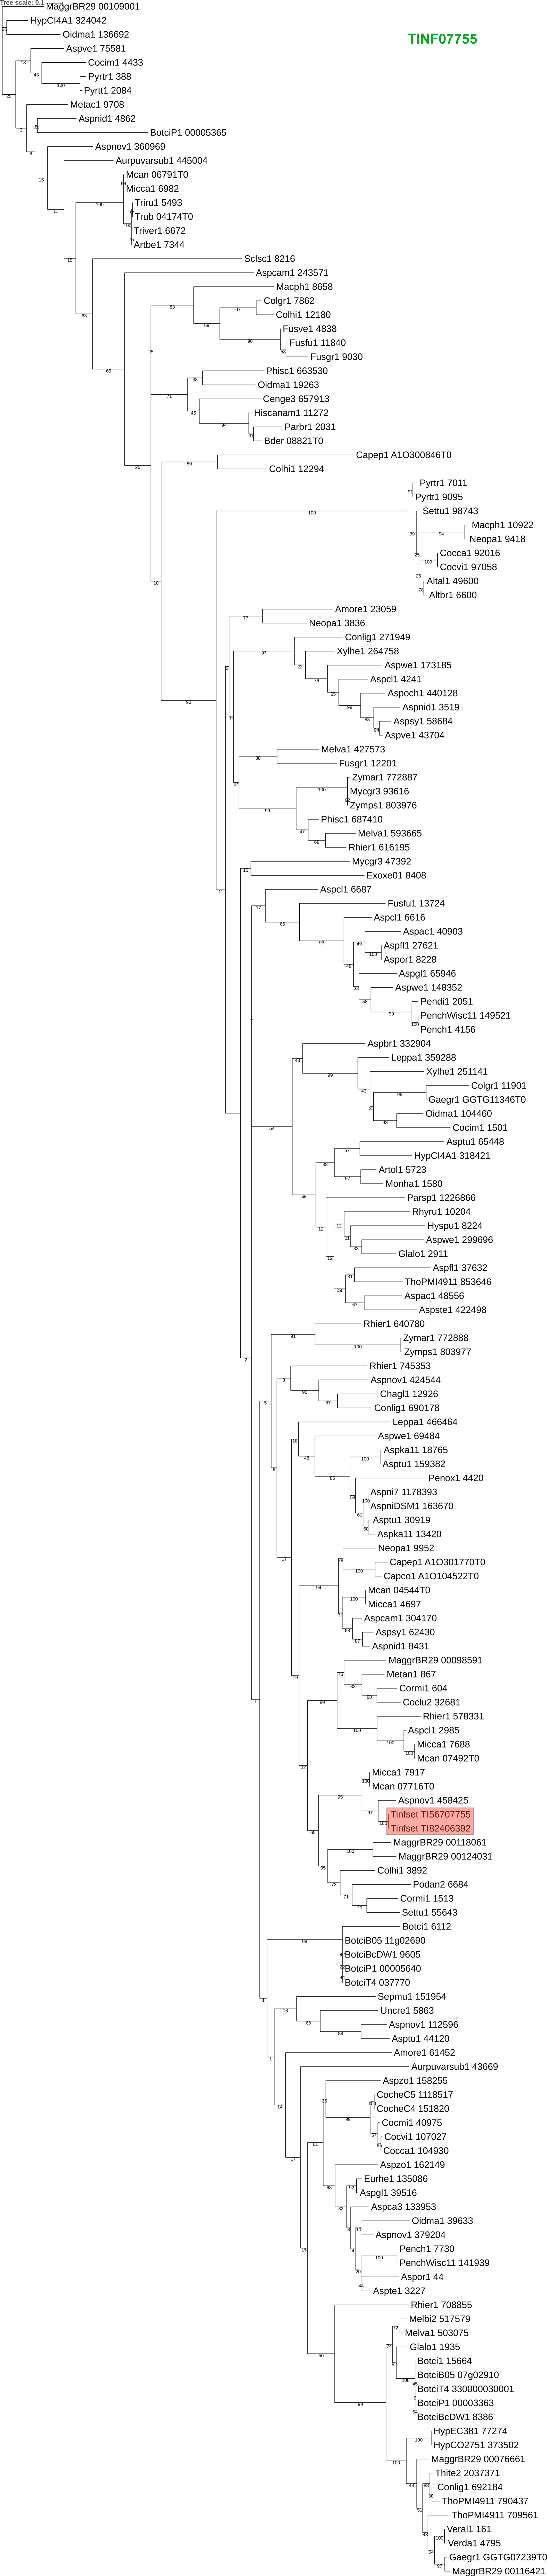

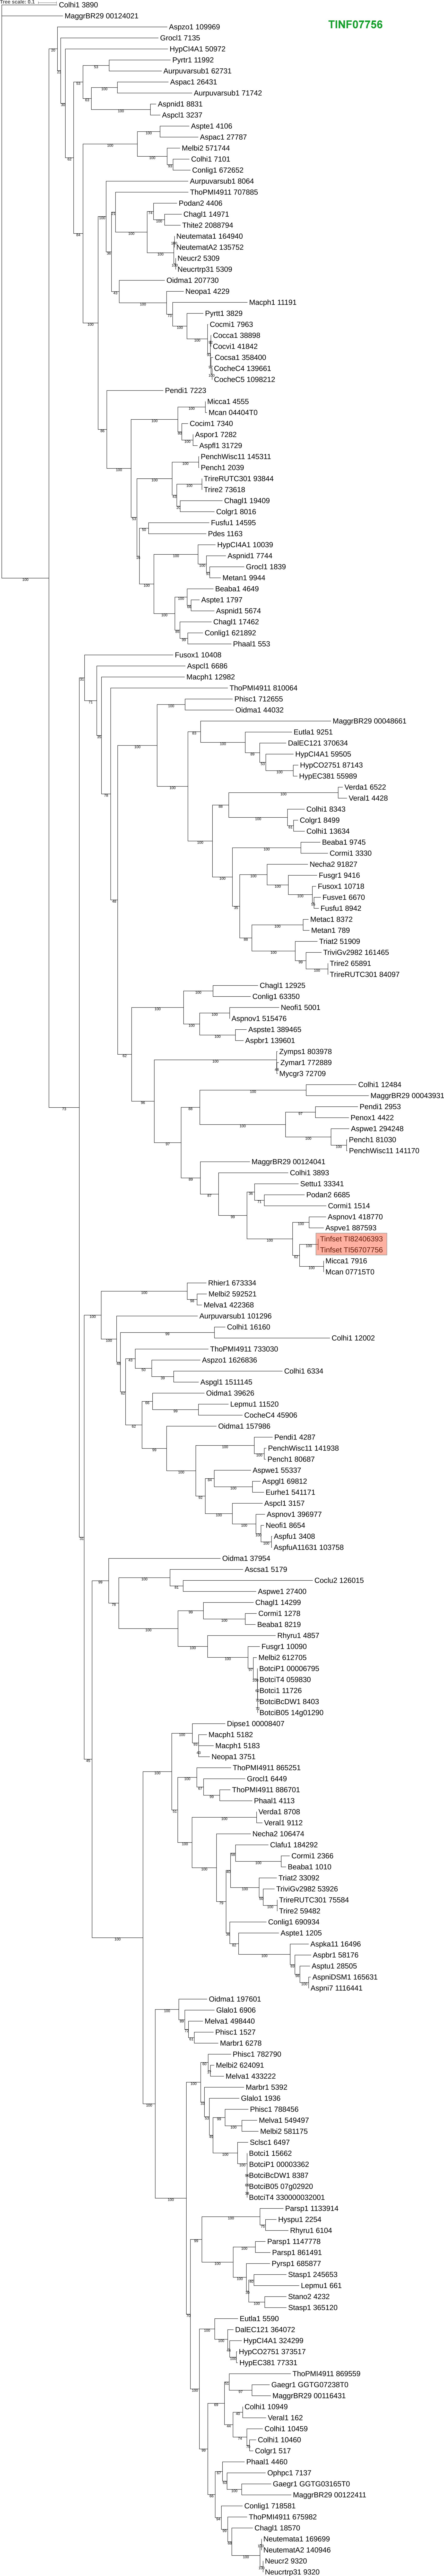

Aspbr1 178553  
AspniDSM1 161636  
Aspni7 1179776

TINF07757

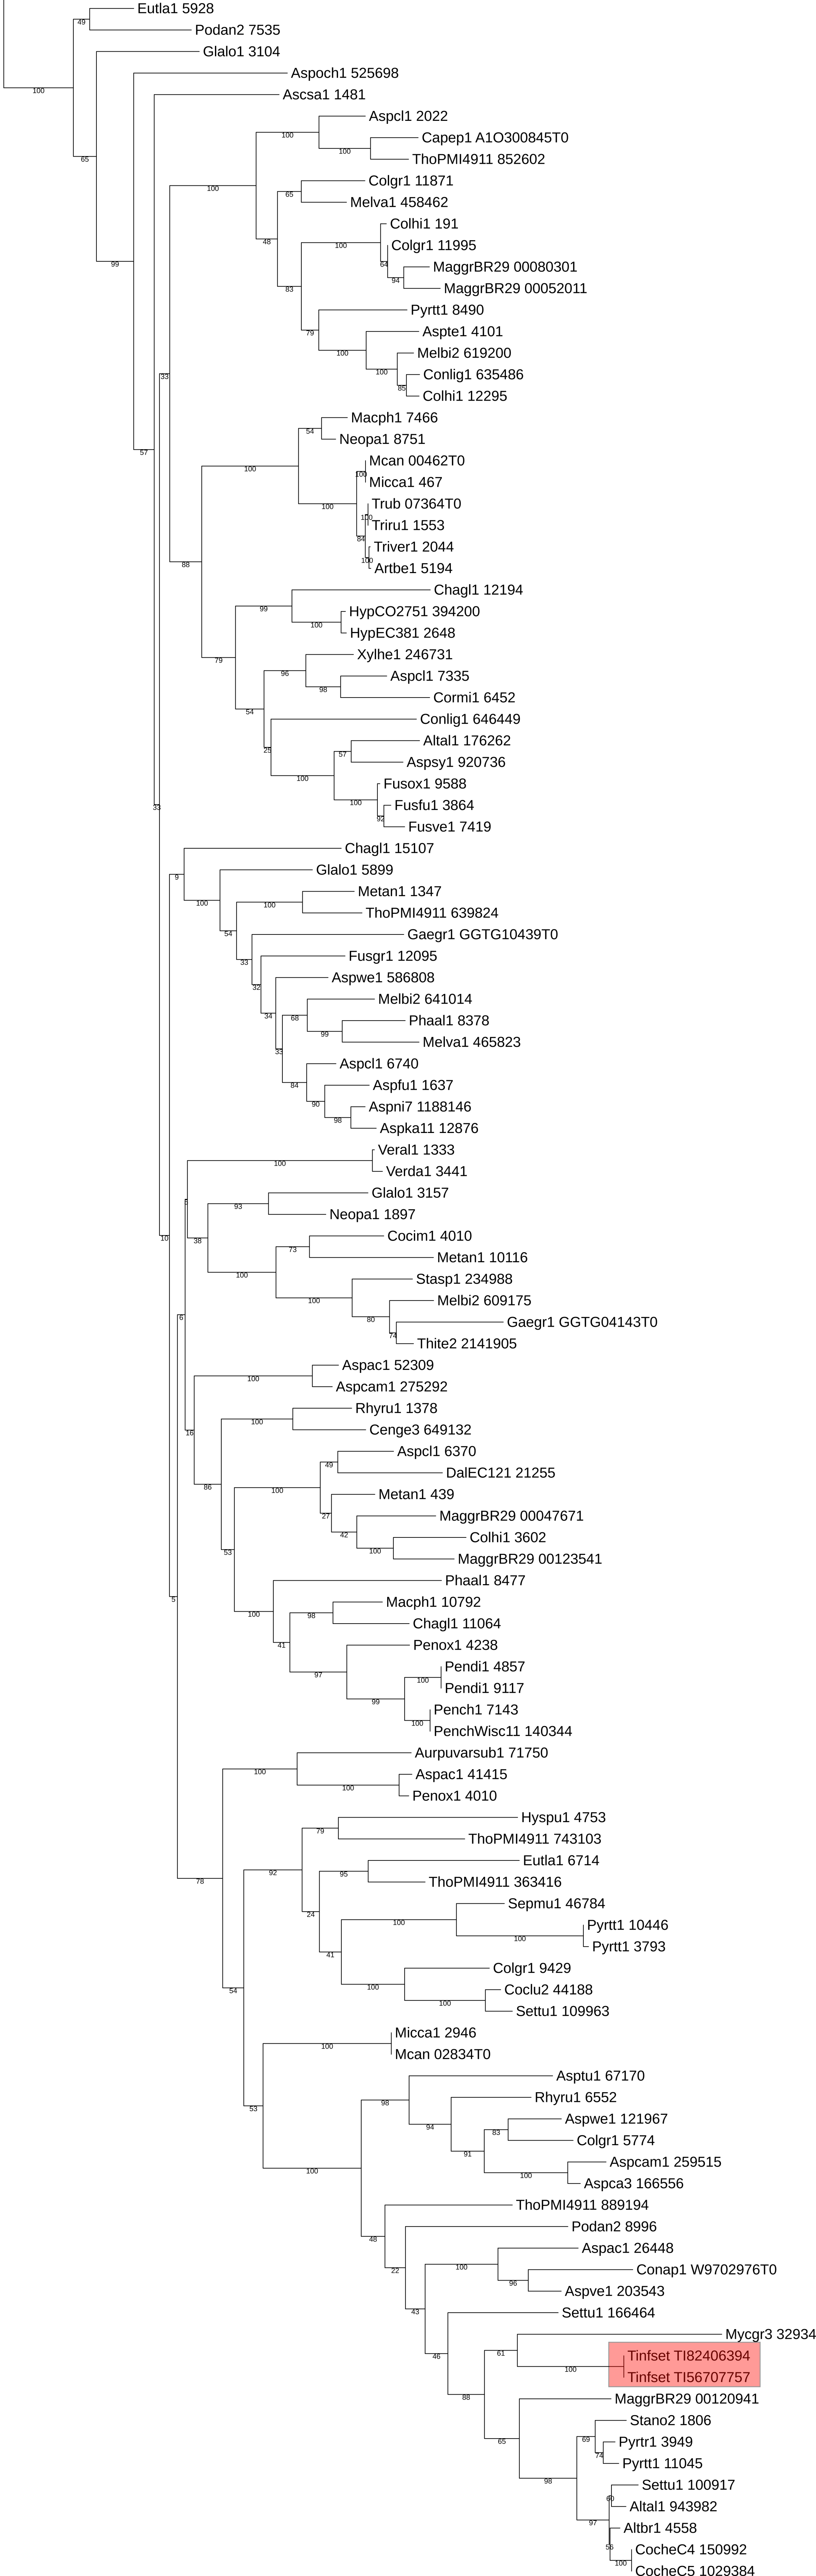

Tree scale: 0.1

**TINF07758**

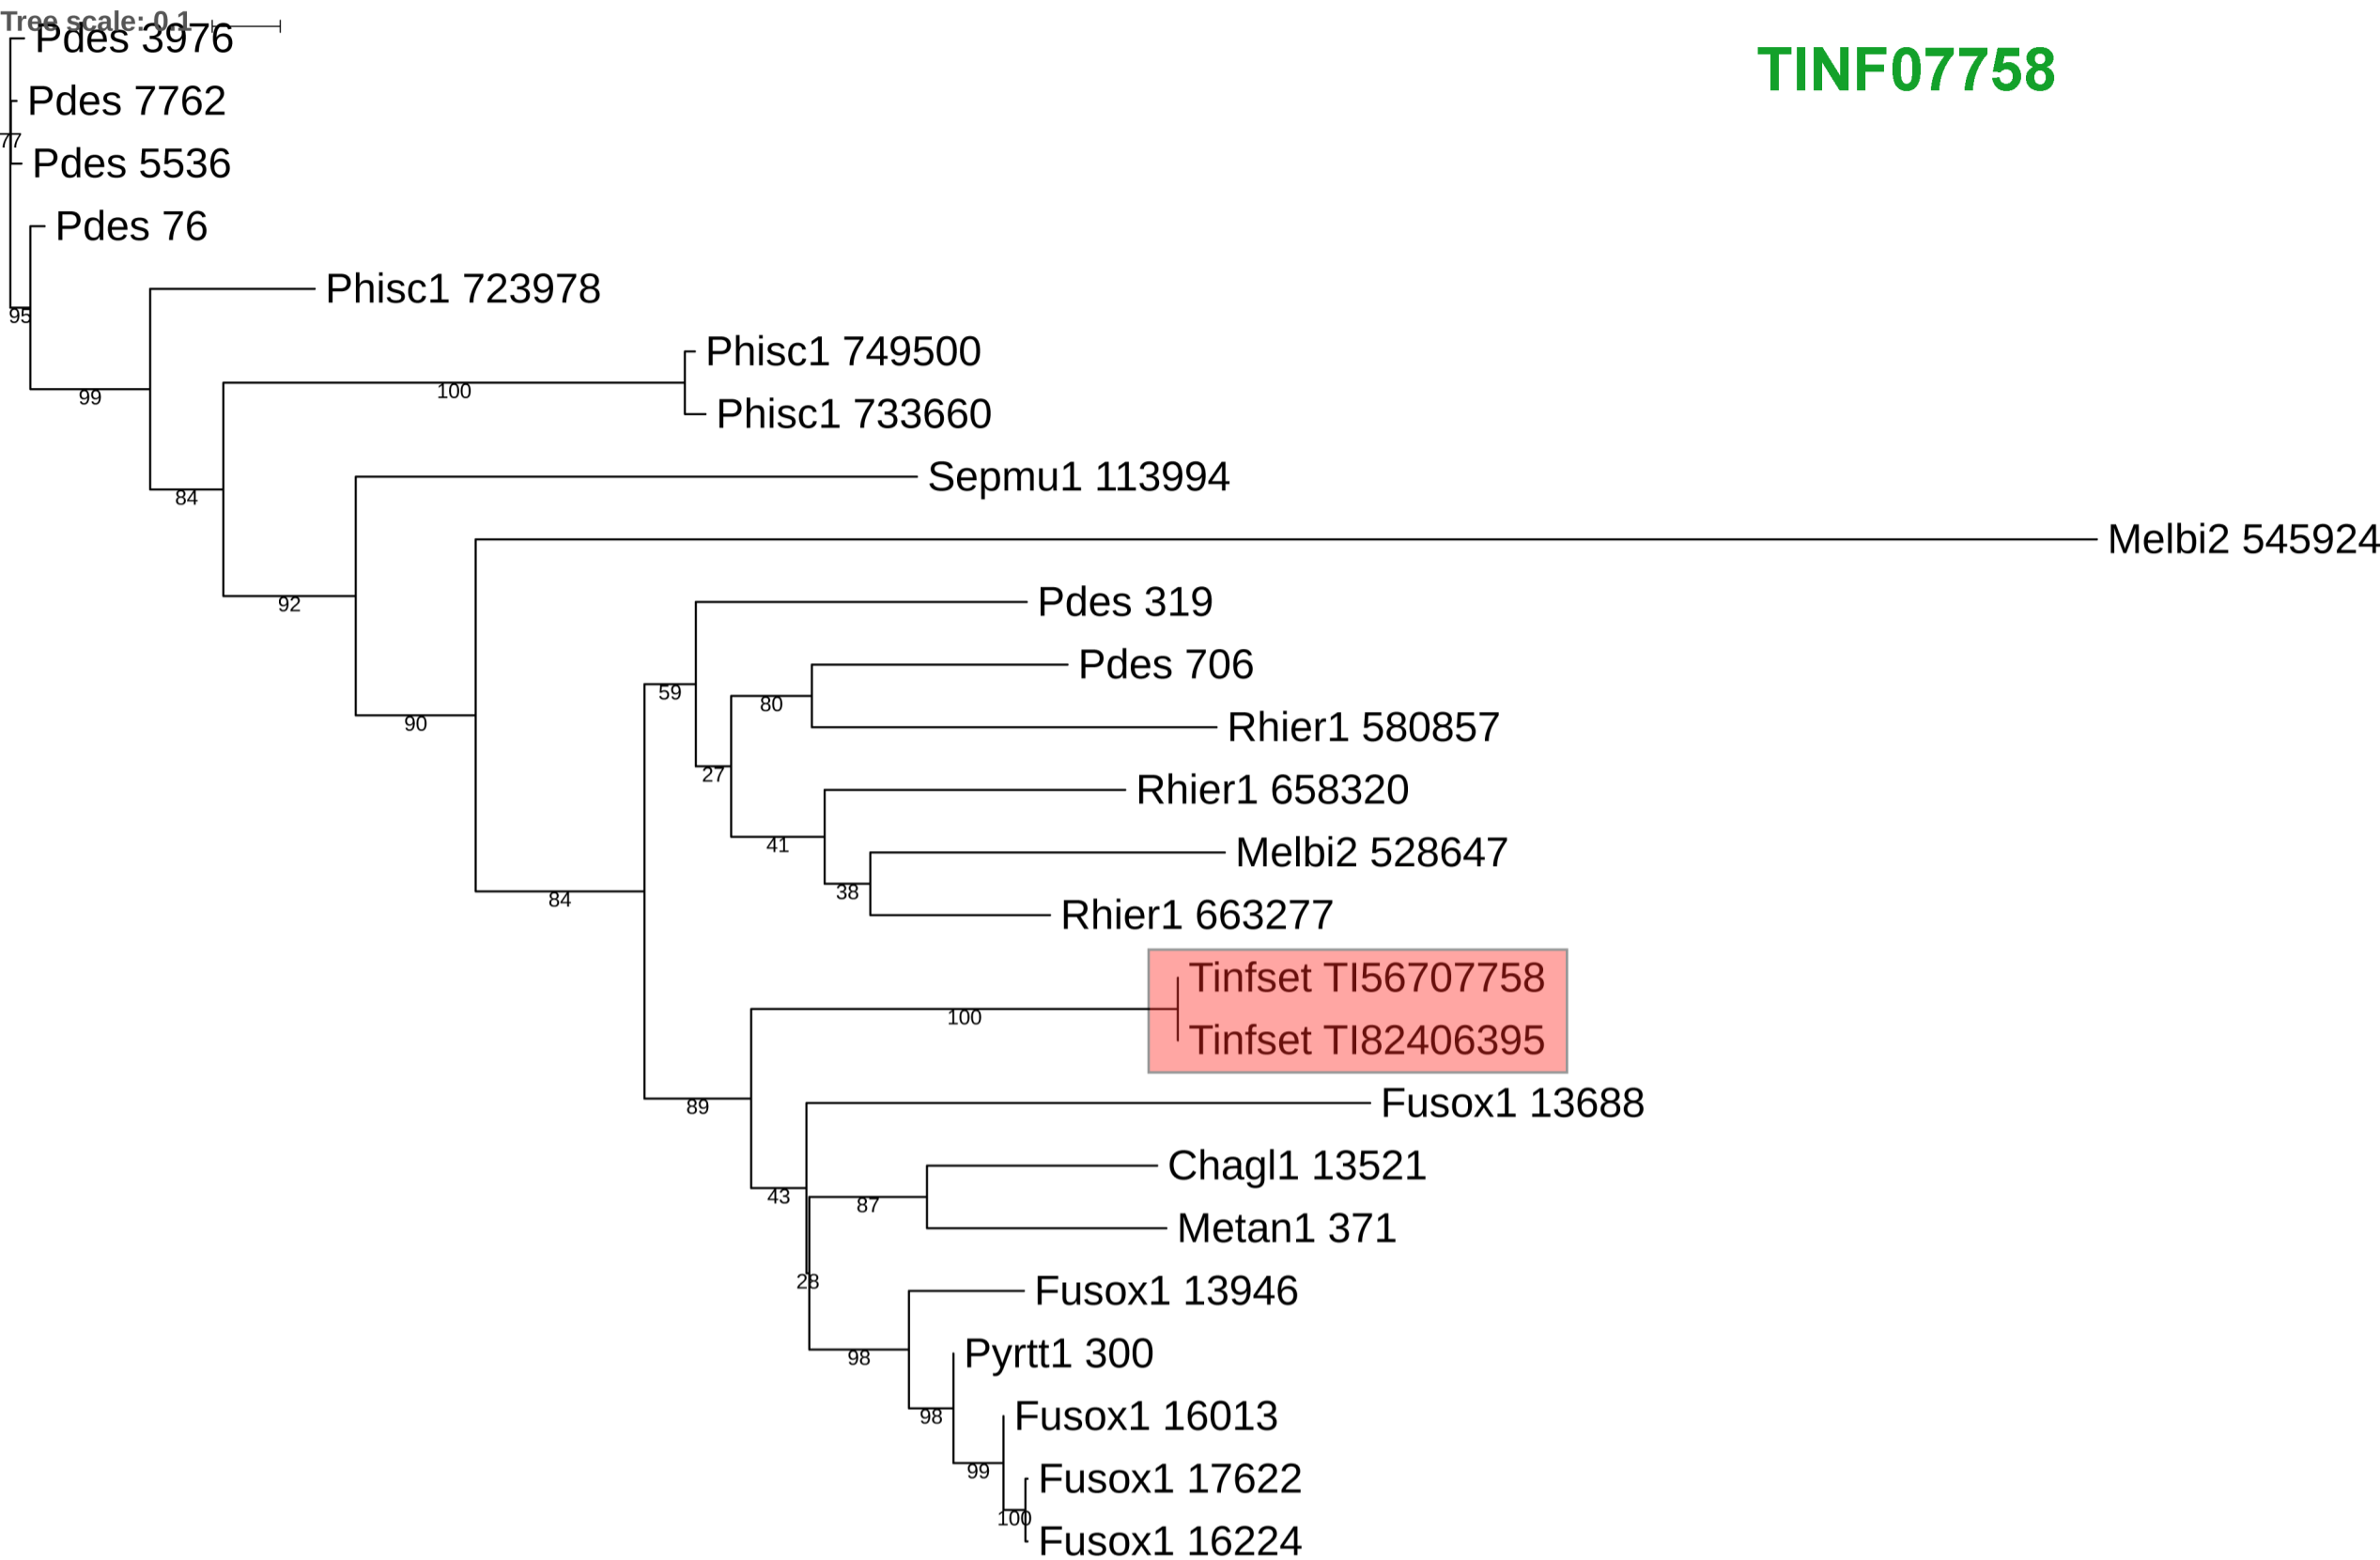

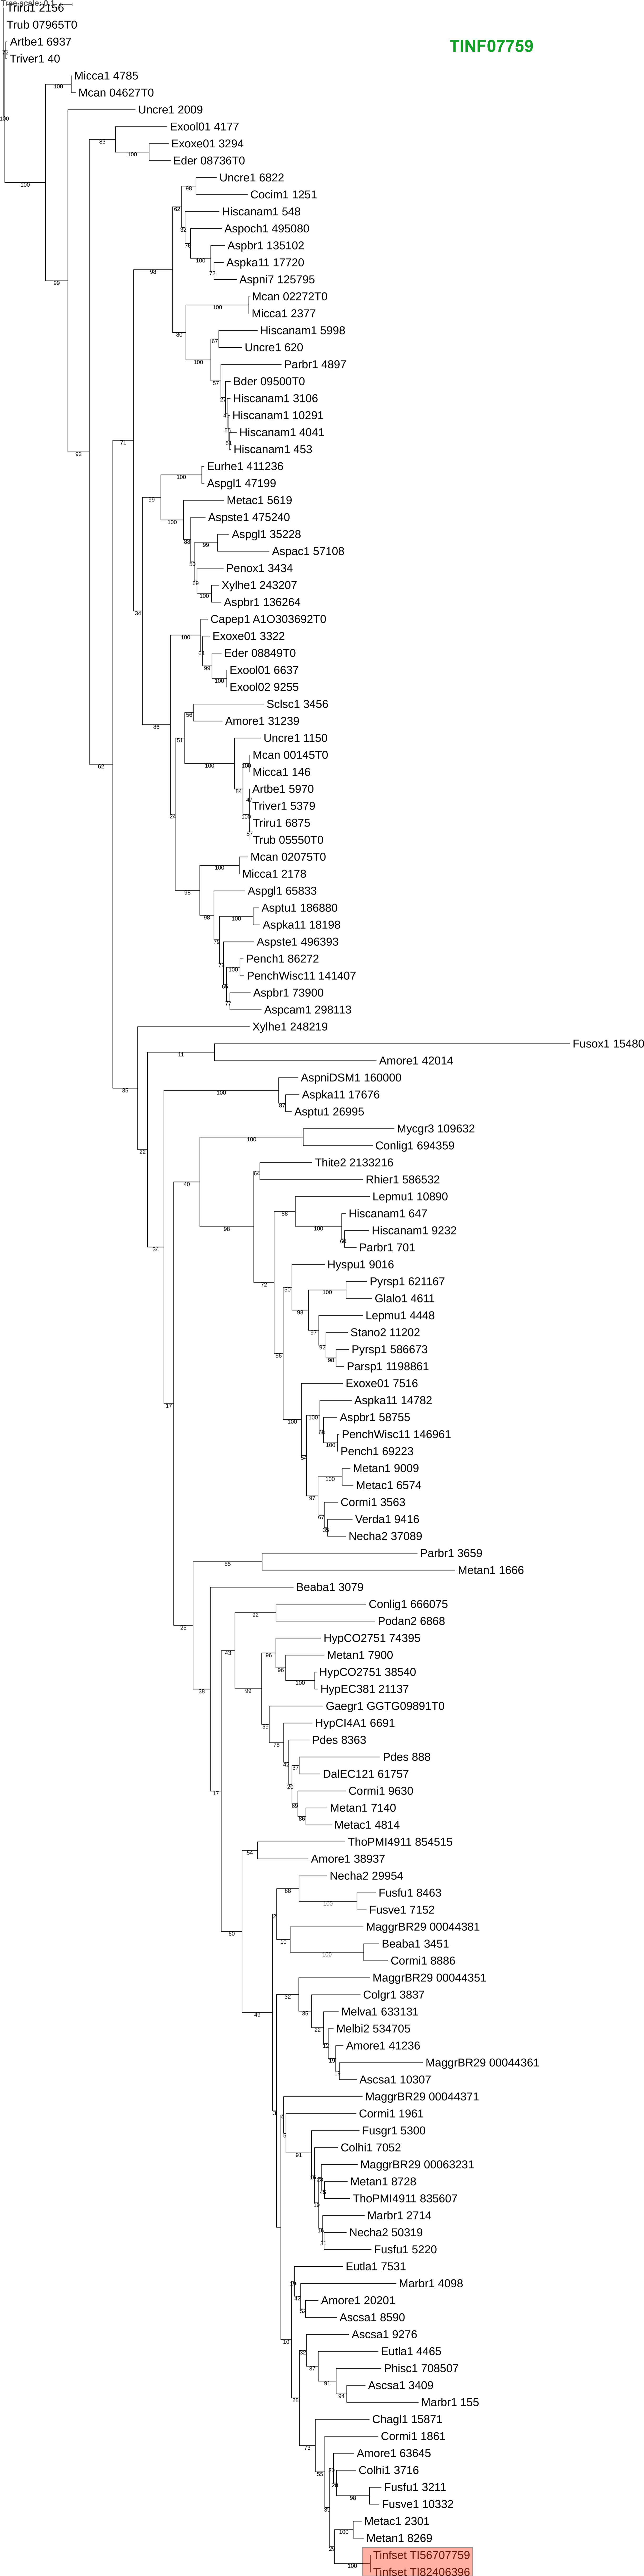

scale 0.1

TINF07760

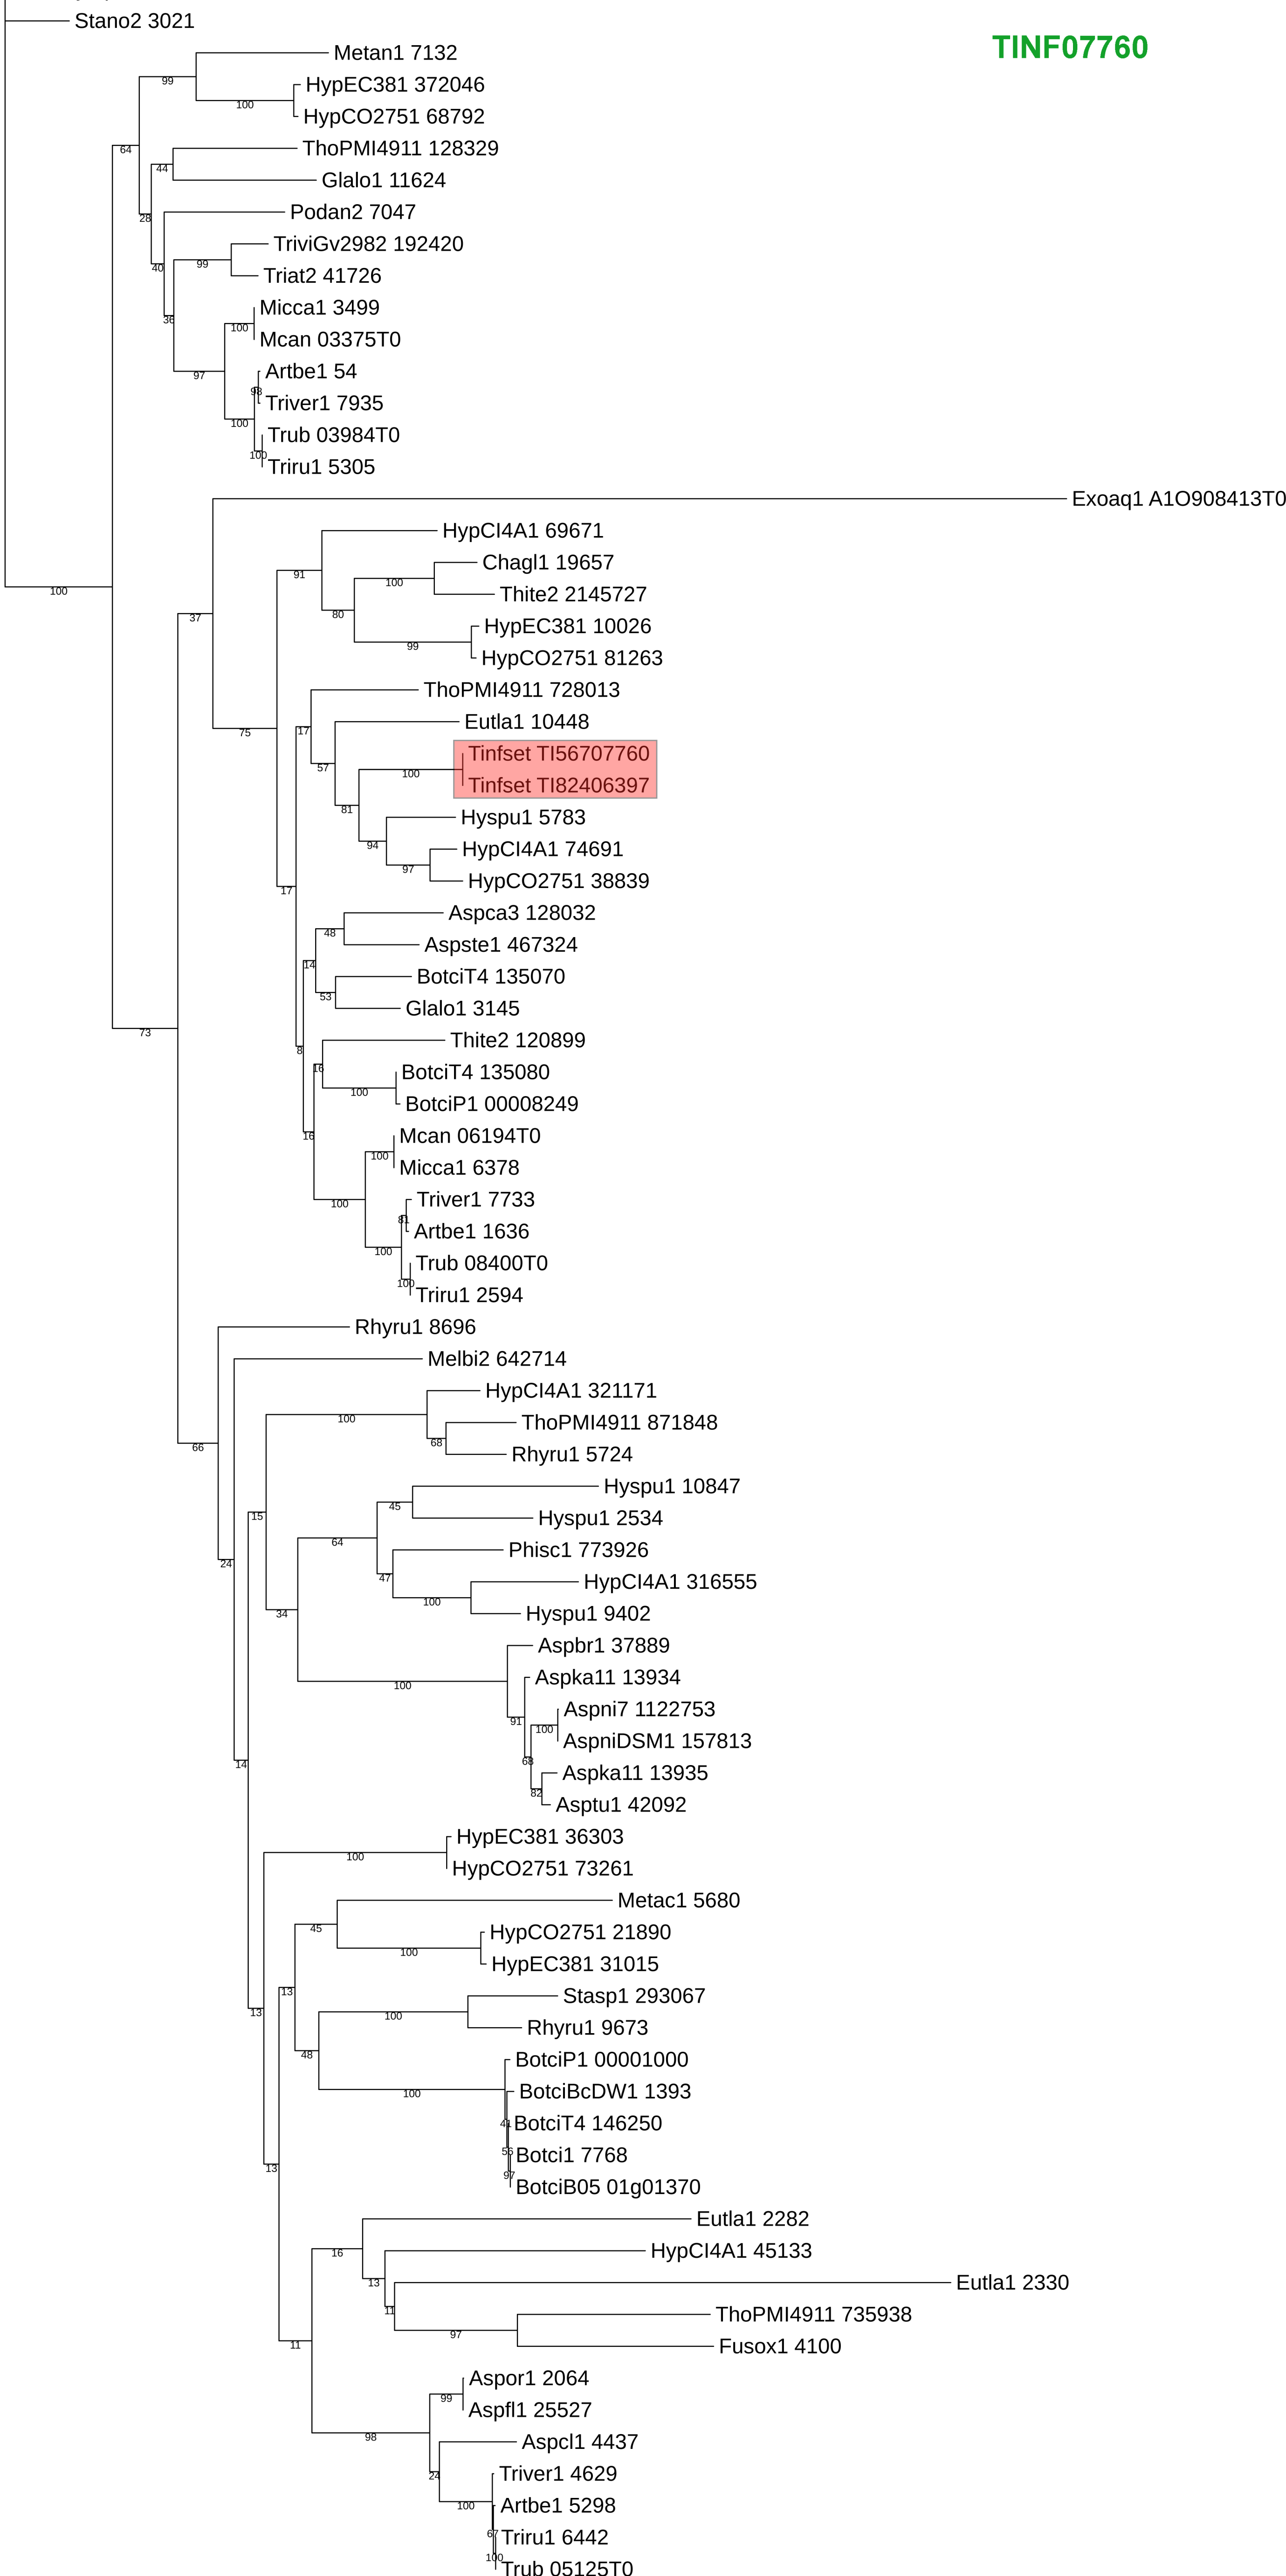



# TINF07761

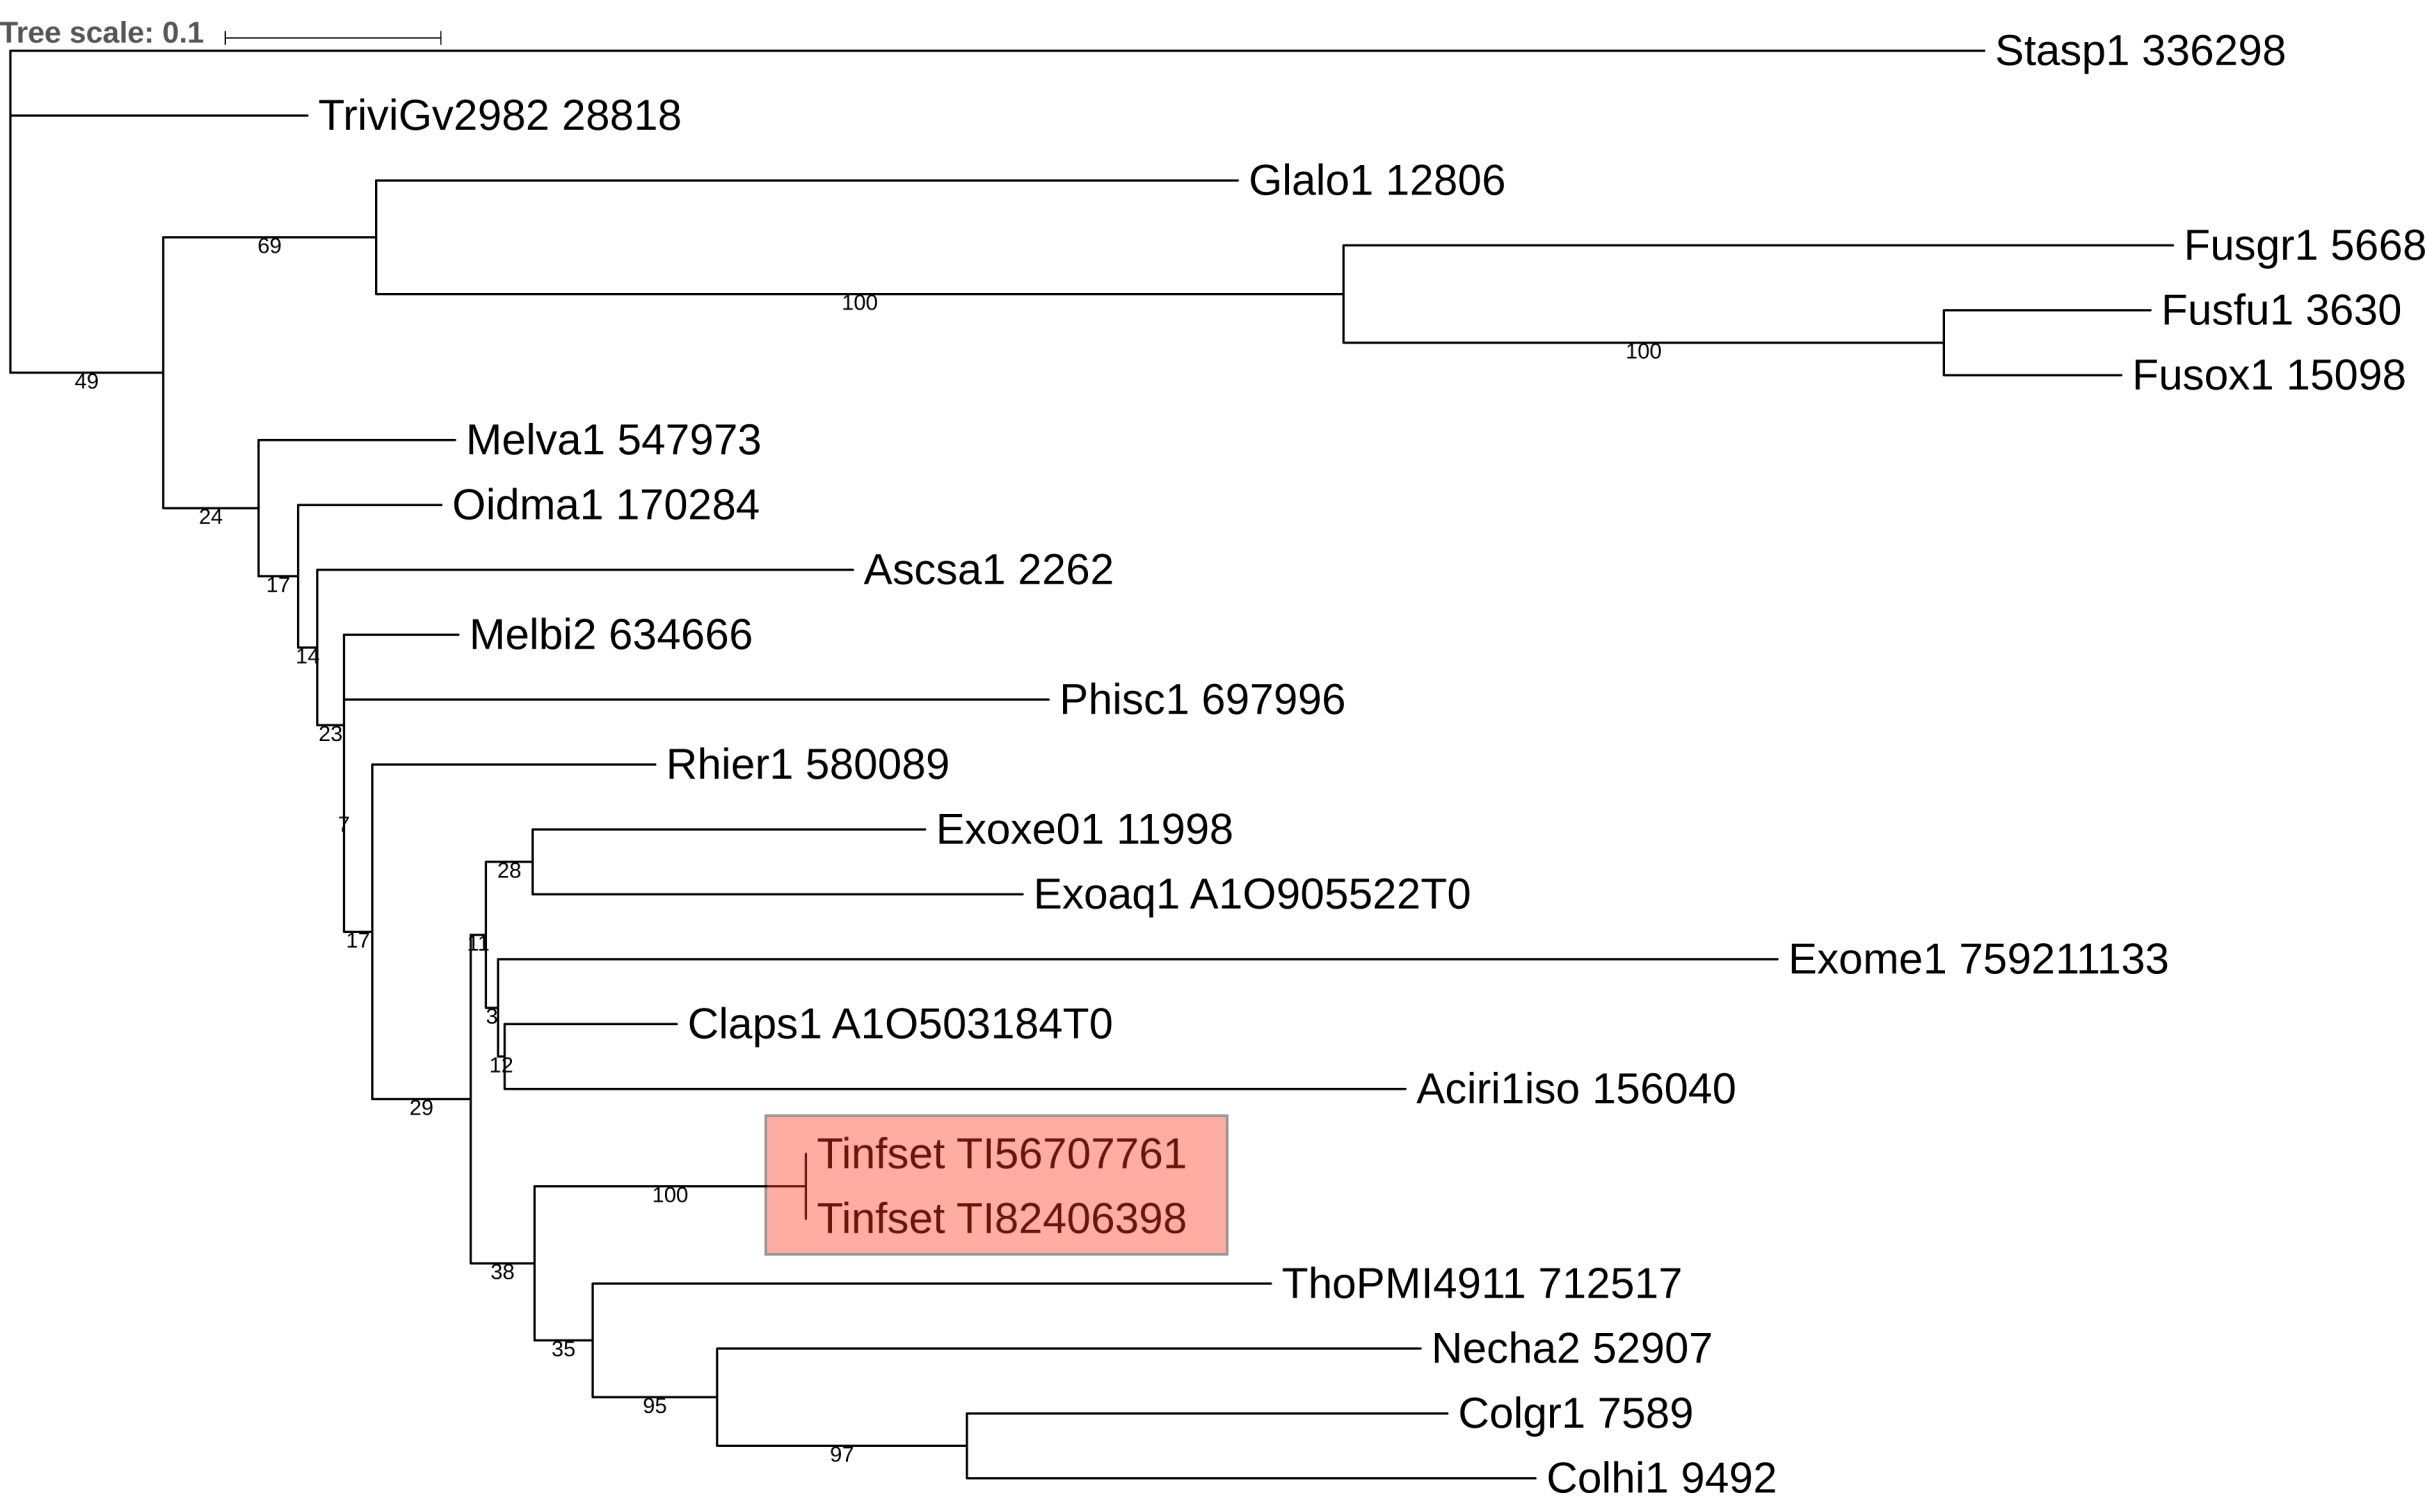

## Key to Fungal Taxa

| <u>Abbreviation</u> | <u>Fungal species</u>                               |
|---------------------|-----------------------------------------------------|
| Aciri1iso           | Acidomyces richmondensis BFW                        |
| Altal1              | Alternaria alternata SRC1lrK2f                      |
| Altbr1              | Alternaria brassicicola                             |
| Amore1              | Amorphotheca resinae                                |
| Artbe1              | Arthroderma benhamiae CBS 112371                    |
| Artol1              | Arthrobotrys oligospora ATCC 24927                  |
| Ascsa1              | Ascocoryne sarcoides NRRL50072                      |
| Aspac1              | Aspergillus aculeatus ATCC16872                     |
| Aspbr1              | Aspergillus brasiliensis                            |
| Aspca3              | Aspergillus carbonarius                             |
| Aspcam1             | Aspergillus campestris IBT 28561                    |
| Aspcl1              | Aspergillus clavatus NRRL 1 from AspGD              |
| Aspfl1              | Aspergillus flavus NRRL3357                         |
| Aspfu1              | Aspergillus fumigatus Af293 from AspGD              |
| AspfuA11631         | Aspergillus_fumigatus_A1163                         |
| Aspgl1              | Aspergillus glaucus                                 |
| Aspka11             | Aspergillus kawachii IFO 4308                       |
| Aspni7              | Aspergillus niger ATCC 1015                         |
| Aspnid1             | Aspergillus nidulans from AspGD                     |
| AspniDSM1           | Aspergillus niger CBS 513.88                        |
| Aspnov1             | Aspergillus novofumigatus IBT 16806                 |
| Aspoch1             | Aspergillus ochraceoroseus IBT 24754                |
| Aspor1              | Aspergillus oryzae RIB40                            |
| Aspste1             | Aspergillus steynii IBT 23096                       |
| Aspsy1              | Aspergillus sydowii                                 |
| Aspte1              | Aspergillus_terreus_NIH_2624                        |
| Asptu1              | Aspergillus tubingensis                             |
| Aspve1              | Aspergillus versicolor                              |
| Aspwe1              | Aspergillus_wentii                                  |
| Aspzo1              | Aspergillus zonatus                                 |
| Aurpuvarmel1        | Aureobasidium pullulans var. melanogenum CBS 110374 |
| Aurpuvarnam1        | Aureobasidium pullulans var. namibiae CBS 147.97    |
| Aurpuvarpul1        | Aureobasidium pullulans var. pullulans EXF-150      |
| Aurpuvarsub1        | Aureobasidium pullulans var. subglaciale EXF-2481   |
| Bauco1              | Baudoinia compniacensis UAMH 10762                  |

|            |                                         |
|------------|-----------------------------------------|
| Bder       | Blastomyces dermatitidis                |
| Beaba1     | Beauveria bassiana ARSEF 2860           |
| Blugr1     | Blumeria graminis f.sp. hordei DH14     |
| Botci1     | Botrytis_cinerea                        |
| BotciB05   | Botrytis_cinerea                        |
| BotciBcDW1 | Botrytis_cinerea                        |
| BotciP1    | Botrytis_cinerea                        |
| BotciT4    | Botrytis_cinerea                        |
| Capco1     | Capronia coronata cbs 617.96            |
| Capep1     | Capronia epimyces cbs 606.96            |
| Cenge3     | Cenococcum geophilum 1.58               |
| Chagl1     | Chaetomium globosum v1.0                |
| Claca1     | Cladophialophora carrionii CBS 160.54   |
| Clafu1     | Cladosporium fulvum                     |
| Claps1     | Cladophialophora psammophila CBS 110553 |
| Claye1     | Cladophialophora yegresii cbs 114405    |
| Cocca1     | Cochliobolus carbonum 26-R-13 v1.0      |
| CocheC4    | Cochliobolus heterostrophus C4          |
| CocheC5    | Cochliobolus heterostrophus C5          |
| Cocim1     | Coccidioides immitis RS                 |
| Coclu2     | Cochliobolus lunatus m118               |
| Cocmi1     | Cochliobolus miyabeanus ATCC 44560      |
| Cocsa1     | Cochliobolus sativus ND90Pr             |
| Cocvi1     | Cochliobolus victoriae FI3              |
| Colgr1     | Colletotrichum graminicola M1.001       |
| Colhi1     | Colletotrichum higginsianum IMI 349063  |
| Conap1     | Coniosporium apollinis cbs 100218       |
| Conlig1    | Coniochaeta ligniaria NRRL 30616 v1.0   |
| Cormi1     | Cordyceps militaris CM01                |
| DalEC121   | Daldinia eschscholzii EC12              |
| Dotse1     | Dothistroma septosporum NZE10           |
| Eder       | Exophiala dermatitidis UT8656           |
| Eurhe1     | Eurotium rubrum                         |
| Eutla1     | Eutypa lata UCREL1                      |
| Exoaq1     | Exophiala aquamarina cbs 119918         |
| Exome1     | Exophiala mesophila CBS40295            |
| Exool01    | Exophiala oligosperma CBS72588          |
| Exool02    | Exophiala oligosperma CBS 72.588        |
| Exoxe01    | Exophiala xenobiotica                   |
| Fusfu1     | Fusarium fujikuroi IMI 58289            |
| Fusgr1     | Fusarium graminearum                    |

|             |                                                                 |
|-------------|-----------------------------------------------------------------|
| Fusox1      | <i>Fusarium oxysporum</i> f. sp. <i>lycopersici</i> strain 4287 |
| Fusve1      | <i>Fusarium verticillioides</i> 7600                            |
| Gaegr1      | <i>Gaeumannomyces graminis</i> var. <i>tritici</i> R3-111a-1    |
| Glalo1      | <i>Glarea lozoyensis</i> ATCC 20868                             |
| Grocl1      | <i>Grosmannia clavigera</i> _kw1407                             |
| Hiscanam1   | <i>Histoplasma capsulatum</i> nam1                              |
| HypCI4A1    | <i>Hypoxyton</i> sp. CI-4A                                      |
| HypCO2751   | <i>Hypoxyton</i> sp. CO27-5 v1.0                                |
| HypEC381    | <i>Hypoxyton</i> sp. EC38 v3.0                                  |
| Hyspu1      | <i>Hysterium pulicare</i>                                       |
| Lepmu1      | <i>Leptosphaeria maculans</i>                                   |
| Leppa1      | <i>Lepidopterella palustris</i>                                 |
| Macph1      | <i>Macrophomina phaseolina</i> MS6                              |
| MaggrBR29   | <i>Magnaporthe grisea</i> BR29                                  |
| Marbr1      | <i>Marssonina brunnea</i> f. sp. <i>multigermtubi</i> MB m1     |
| Mcan        | <i>Microsporium canis</i> CBS113480                             |
| Melbi2      | <i>Meliniomyces bicolor</i> E                                   |
| Melva1      | <i>Meliniomyces variabilis</i> F                                |
| Metac1      | <i>Metarhizium acridum</i> CQMa 102                             |
| Metan1      | <i>Metarhizium robertsii</i> ARSEF 23                           |
| Micca1      | <i>Microsporium canis</i> CBS 113480                            |
| Monha1      | <i>Monacrosporium haptotylum</i> CBS 200.50                     |
| Mycgr3      | <i>Mycosphaerella graminicola</i>                               |
| Necha2      | <i>Nectria haematococca</i>                                     |
| Neofi1      | <i>Neosartorya fischeri</i> NRRL 181                            |
| Neopa1      | <i>Neofusicoccum parvum</i> UCRNP2                              |
| Neucr2      | <i>Neurospora crassa</i> OR74A v2.0                             |
| Neucrtrp31  | <i>Neurospora crassa</i> FGSC 73 trp-3 v1.0                     |
| Neutemata1  | <i>Neurospora tetrasperma</i> FGSC 2509 mat a v1.0              |
| Neutemata2  | <i>Neurospora tetrasperma</i> FGSC 2508 mat A v2.0              |
| Oidma1      | <i>Oidiodendron maius</i> Zn                                    |
| Ophpc1      | <i>Ophiostoma piceae</i> UAMH 11346                             |
| Parbr1      | <i>Paracoccidioides brasiliensis</i> _Pb03                      |
| Parsp1      | <i>Paraconiothyrium sporulosum</i> AP3s5-JAC2a                  |
| Pdes        | <i>Pseudogymnoascus destructans</i> 20631-21                    |
| Pench1      | <i>Penicillium chrysogenum</i> v1.0                             |
| PenchWisc11 | <i>Penicillium chrysogenum</i> Wisconsin 54-1255                |
| Pendi1      | <i>Penicillium digitatum</i> PHI26                              |
| Penox1      | <i>Penicillium oxalicum</i> 114-2                               |
| Phaal1      | <i>Phaeoacremonium aleophilum</i> UCRPA7                        |
| Phieu1      | <i>Phialophora europaea</i> cbs 101466                          |

|              |                                         |
|--------------|-----------------------------------------|
| Phisc1       | Phialocephala scopiformis 5WS22E1       |
| Podan2       | Podospora anserina S mat+               |
| Pyrco1       | Pyronema confluens CBS100304            |
| Pyrsp1       | Pyrenochaeta sp. DS3sAY3a               |
| Pyrtr1       | Pyrenophora tritici-repentis            |
| Pyrtt1       | Pyrenophora teres f. teres              |
| Rhier1       | Rhizoscyphus ericae UAMH 7357           |
| Rhyru1       | Rhytidhysterium rufulum                 |
| Sclsc1       | Sclerotinia_sclerotiorum                |
| Sepmu1       | Septoria musiva SO2202                  |
| Settu1       | Setosphaeria turcica Et28A              |
| Stano2       | Stagonospora nodorum SN15               |
| Stasp1       | Stagonospora sp. SRC1lsM3a              |
| Thite2       | Thielavia terrestris v2.0               |
| ThoPMI4911   | Thozetella sp. PMI 491                  |
| Tinfset      | Tolyocladium inflatum multiple          |
| Triat2       | Trichoderma_atroviride                  |
| Trire2       | Trichoderma reesei                      |
| TrireRUTC301 | Trichoderma reesei RUT C-30             |
| Triru1       | Trichophyton_rubrum_CBS_118892          |
| Triver1      | Trichophyton verrucosum HKI 0517        |
| TriviGv2982  | Trichoderma virens Gv29-8               |
| Trub         | Trichophyton rubrum CBS118892           |
| Tubme1       | Tuber melanosporum from Genoscope       |
| Uncre1       | Uncinocarpus reesii 1704                |
| Xylhe1       | Xylona heveae TC161                     |
| Zymar1       | Zymoseptoria ardabiliae STIR04 1.1.1    |
| Zymps1       | Zymoseptoria pseudotritici STIR04 2.2.1 |
