# Supplementary material for: Chromosome rearrangements shape the diversification of secondary metabolism in the cyclosporin producing fungus Tolypocladium inflatum
Source: PubMed Central journal article supplement (PMC6367777; doi:10.1186/s12864-018-5399-x), 2019-02-07

**Figure S13** Mauve alignments of other clusters: conserved across all strains: A) Fumonisin-like cluster and B) Stipitatic acid-like cluster. Red shading shows conserved syntenic regions inside each SMBC.

### A. Fumonisin-like Cluster - Chromosome 3 cluster 19

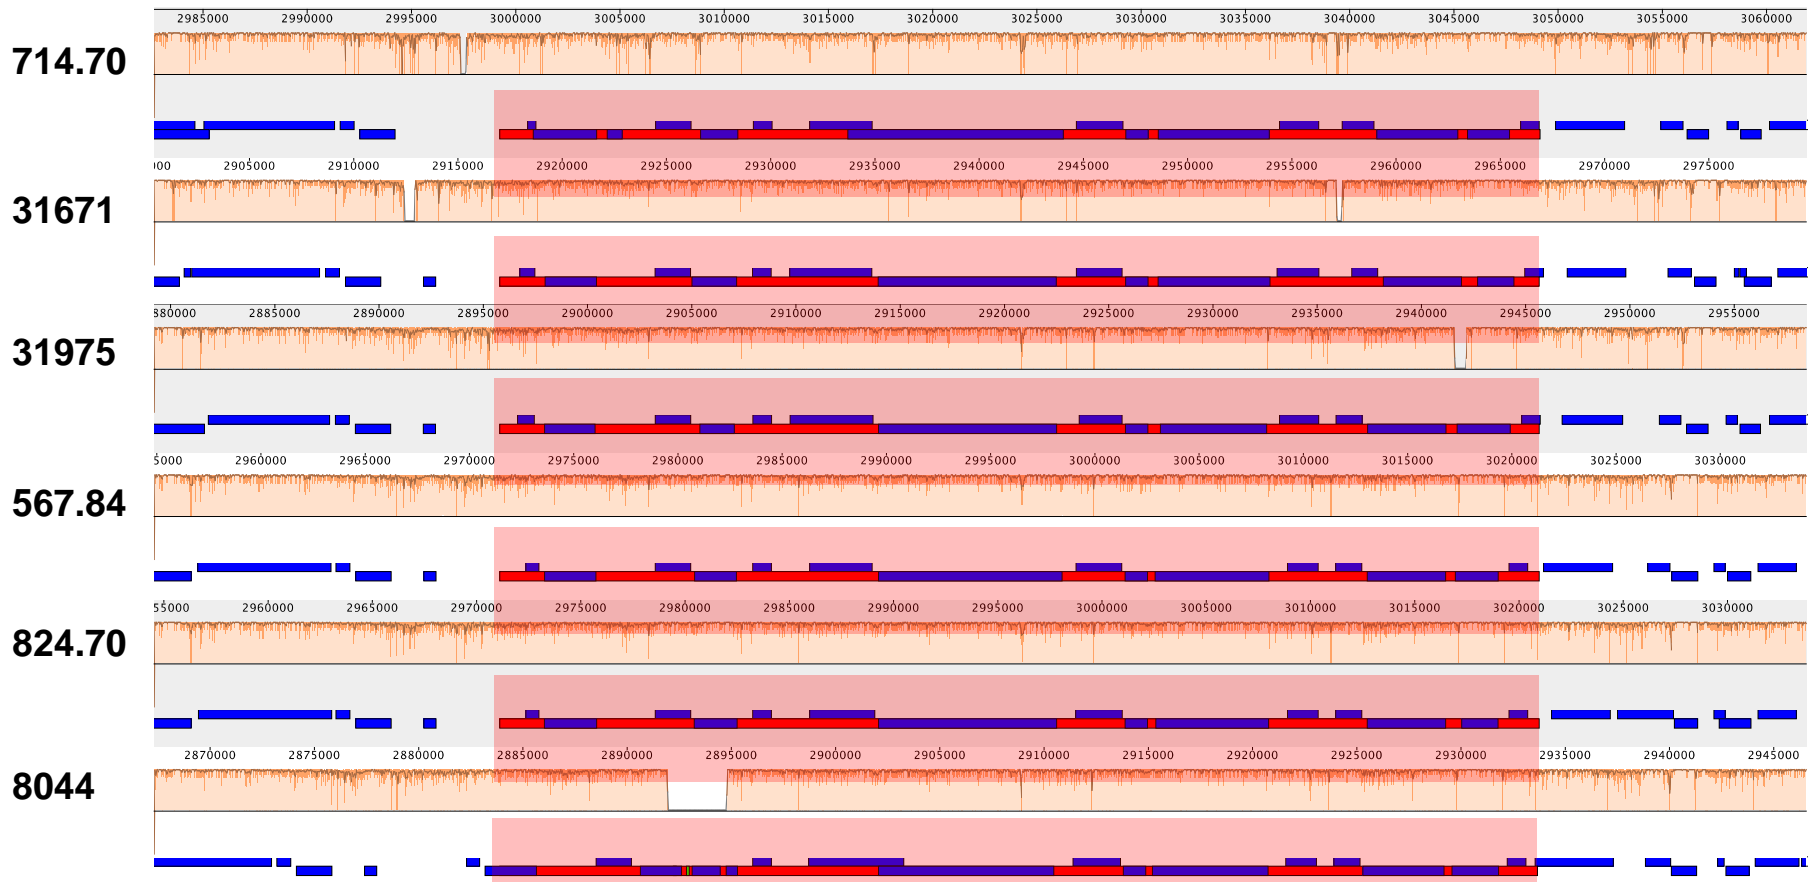

## B. Stipitatic Acid-like Cluster - Chromosome 4 cluster 25

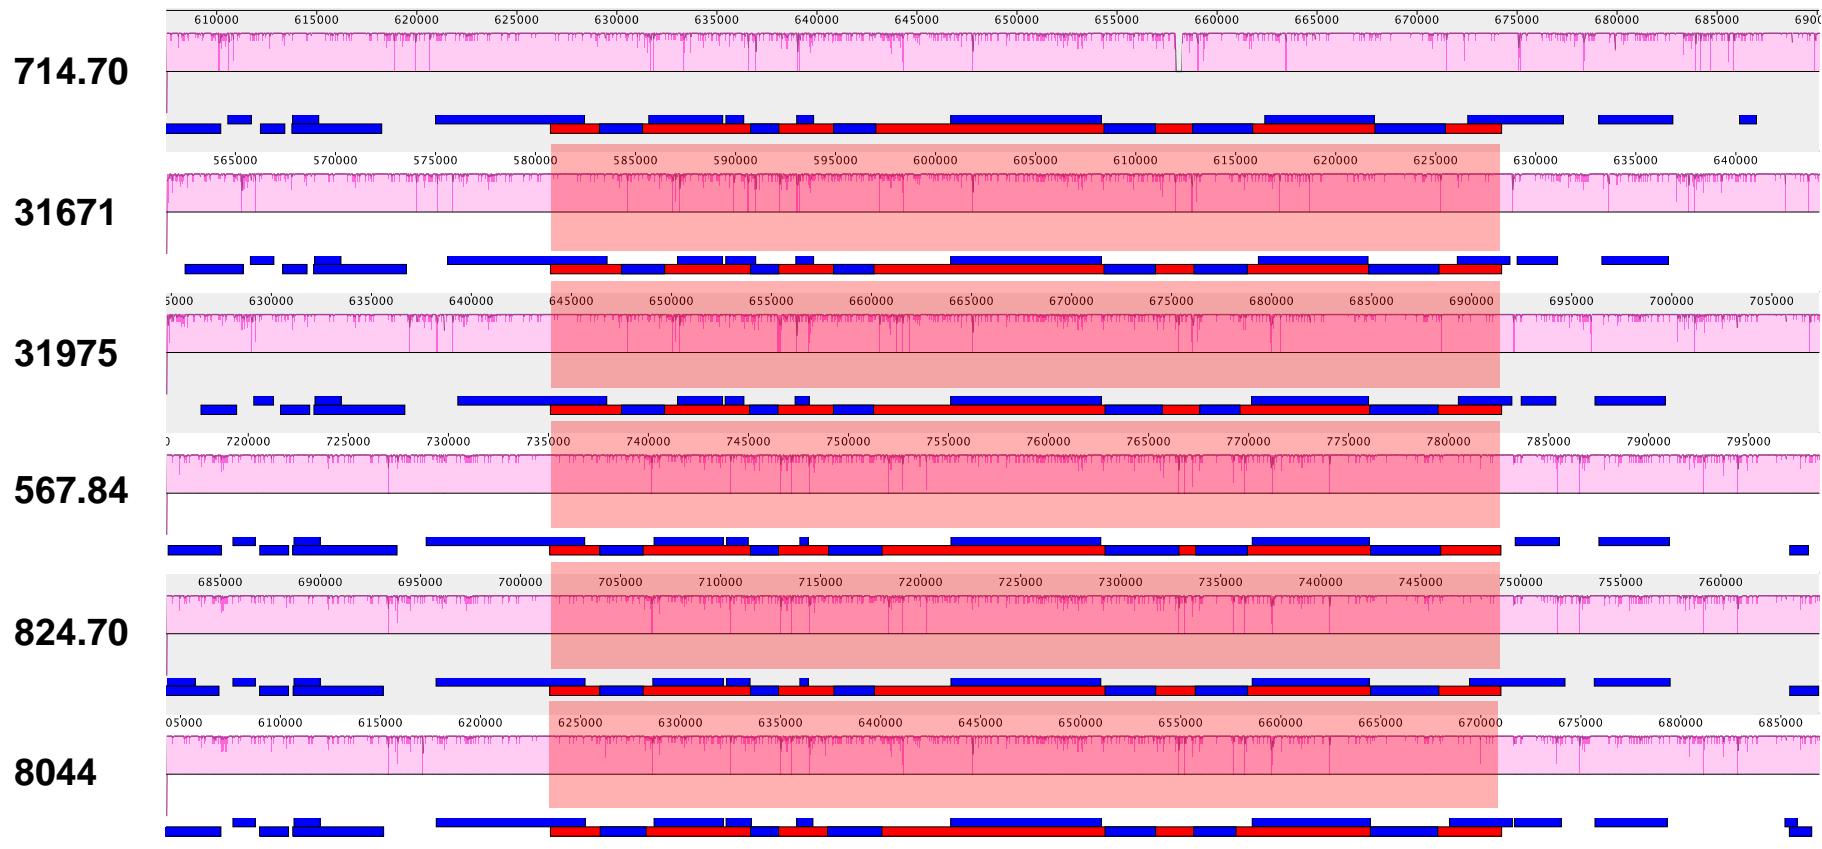

Supplement: 12864_2018_5399_MOESM21_ESM.pdf [file 12864_2018_5399_MOESM21_ESM.pdf]
