# Supplementary material for: Chromosome rearrangements shape the diversification of secondary metabolism in the cyclosporin producing fungus Tolypocladium inflatum
Source: BMC Genomics. 2019 Feb 7;20:120. doi: 10.1186/s12864-018-5399-x (PMC6367777; doi:10.1186/s12864-018-5399-x)
Supplement: Supplementary file 9 — Table S4. Secondary metabolite clusters found in six T. inflatum strains. (XLXS 17.5 kb) [file 12864_2018_5399_MOESM9_ESM.xlsx]

## Sheet: Sheet1
Table S4. Locations of secondary metabolite gene clusters in the T. inflatum genomes
chromosome	cluster	714	start	end	core gene		31671	start	end	core gene		31975	start	end	core gene		567	start	end	core gene		824	start	end	core gene		8044	start	end	core gene
chrom 1	1	unitig_0	39281	87513	Nrps		unitig_28	36226	158868	T1pks-Nrps		unitig_38	5639	128278	T1pks-Nrps		unitig_0	9953	132595	T1pks-Nrps		unitig_0	9923	132565	T1pks-Nrps		unitig_0	83842	206483	T1pks-Nrps
chrom 1	A						unitig_28	275797	325410	Nrps		unitig_38	248708	302182	Nrps		unitig_0	251875	305469	Nrps		unitig_0	251842	305436	Nrps		unitig_0	326791	380349	Nrps
chrom 1	2	unitig_0	408562	459480	T1pks		unitig_28	437634	487823	T1pks		unitig_38	434246	485020	T1pks		unitig_0	497691	548185	T1pks		unitig_0	497643	548137	T1pks		unitig_0	529716	580210	T1pks
chrom 1	3	unitig_0	687231	730554	Other		unitig_28	716218	759539	Other		unitig_38	723330	766651	Other		unitig_0	782177	825497	Other		unitig_0	782128	825448	Other		unitig_0	852219	895526	Other
chrom 1	4	unitig_0	2033481	2054812	Terpene		unitig_28	1911970	1933301	Terpene		unitig_38	1957985	1979322	Terpene		unitig_0	1995326	2016657	Terpene		unitig_0	1995236	2016567	Terpene		unitig_0	2098853	2120178	Terpene
chrom 1	5	unitig_0	2710145	2757360	T1pks		unitig_28	2587836	2635051	T1pks		unitig_38	2625931	2673146	T1pks		unitig_0	2663556	2710771	T1pks		unitig_0	2663456	2710671	T1pks		unitig_0	2768973	2816188	T1pks
chrom 1	6	unitig_0	2978102	3025181	T1pks		unitig_28	2856009	2903240	T1pks		unitig_38	2899559	2945703	T1pks		unitig_0	2932334	2979039	T1pks		unitig_0	2932229	2978934	T1pks		unitig_0	3042331	3089036	T1pks
chrom 1	7	unitig_0	3391772	3437770	Nrps		unitig_28	3266624	3314453	Nrps		unitig_38	3326486	3374315	Nrps		unitig_0	3348735	3396588	Nrps		unitig_0	3348620	3396473	Nrps		unitig_0	3460737	3508566	Nrps
chrom 1	8	unitig_0	3618032	3679211	T1pks		unitig_28	3492975	3554151	T1pks		unitig_38	3570212	3631388	T1pks		unitig_0	3582640	3643816	T1pks		unitig_0	3582519	3643695	T1pks		unitig_0	3694460	3755598	T1pks
chrom 1	9	unitig_0	5442109	5489618	T1pks		unitig_28	5317580	5365401	T1pks		unitig_38	5567420	5613726	T1pks		unitig_0	5411416	5457722	T1pks		unitig_0	5411261	5457567	T1pks		unitig_0	5532365	5572450	T1pks
chrom 1	10	unitig_0	5519937	5632327	Nrps		unitig_28	5399040	5511010	Nrps		unitig_38	5649061	5760647	Nrps		unitig_0	5492901	5604751	Nrps		unitig_0	5492744	5604593	Nrps
chrom 2	11	unitig_1	479517	530397	Nrps		unitig_0	592778	643658	Nrps		unitig_0	552631	603511	Nrps		unitig_2	587897	638777	Nrps		unitig_1	587729	638609	Nrps		unitig_49	550450	601330	Nrps
chrom 2	12	unitig_1	4639533	4683387	Other		unitig_0	4671638	4715492	Other		unitig_0	4642042	4685896	Other		unitig_2	4673612	4717466	Other		unitig_1	4673312	4717166	Other		unitig_34	2095779	2142125	Other
chrom 2	13	unitig_1	4741172	4795219	T1pks		unitig_0	4733806	4787861	T1pks		unitig_0	4704251	4758304	T1pks		unitig_2	4735823	4789888	T1pks		unitig_1	4735522	4789587	T1pks		unitig_34	2165138	2219371	T1pks
chrom 2	14	unitig_1	4963675	5009787	T1pks		unitig_0	4968037	5014043	T1pks		unitig_0	4934445	4980451	T1pks		unitig_2	4971001	5018029	T1pks		unitig_1	4970706	5017734	T1pks		unitig_34	2400155	2447180	T1pks
chrom 3	15	unitig_2	38490	88363	T1pks		unitig_2	28123	77990	T1pks		unitig_49	38954	88821	T1pks		unitig_3	34801	84670	T1pks		unitig_4	34555	84424	T1pks		unitig_3	7717	57586	T1pks
chrom 3	16	unitig_2	115944	170615	Nrps		unitig_2	105835	160506	Nrps		unitig_49	116898	171569	Nrps		unitig_3	112927	167598	Nrps		unitig_4	112680	167351	Nrps		unitig_3	85824	140495	Nrps
chrom 3	17	unitig_2	1018795	1080185	T1pks		unitig_2	979320	1040706	T1pks							unitig_3	986035	1047078	T1pks		unitig_4	985742	1046785	T1pks		unitig_3	961706	1022773	T1pks
chrom 3	18	unitig_2	1737955	1782539	Nrps		unitig_2	1695612	1739336	Nrps		unitig_49	1695950	1742242	Nrps		unitig_3	1711181	1755128	Nrps		unitig_4	1710882	1754829	Nrps		unitig_3	1673563	1717287	Nrps
chrom 3	19	unitig_2	2999228	3049146	T1pks-Nrps		unitig_2	2916999	2966903	T1pks-Nrps		unitig_49	2895785	2945683	T1pks-Nrps		unitig_3	2971449	3021331	T1pks-Nrps		unitig_4	2971106	3020988	T1pks-Nrps		unitig_3	2883886	2933682	T1pks-Nrps
chrom 3	20	unitig_2	4019644	4067378	T1pks		unitig_2	3949742	3997425	T1pks		unitig_49	3925490	3973083	T1pks		unitig_3	3994277	4041967	T1pks		unitig_4	3993918	4041608	T1pks		unitig_3	3912231	3959921	T1pks
chrom 3	21	unitig_2	4203502	4256200	Nrps		unitig_2	4135107	4187808	Nrps		unitig_49	4107947	4160645	Nrps		unitig_3	4183124	4236830	Nrps		unitig_4	4182768	4236474	Nrps		unitig_3	4101016	4154722	Nrps
chrom 3	22	unitig_2	4400934	4446185	Other		unitig_2	4314636	4375943	Terpene		unitig_49	4290345	4345562	Terpene		unitig_3	4377530	4420806	Other		unitig_4	4377171	4420447	Other		unitig_3	4295086	4340838	Other
chrom 4	23	unitig_3	4388	49872	Nrps							unitig_2	40953	89375	T1pks
chrom 4	24	unitig_3	146621	168659	Terpene		unitig_1	111434	132621	Terpene		unitig_2	171490	192677	Terpene		unitig_1	262920	284107	Terpene		unitig_3	229344	250531	Terpene		unitig_4	141378	162565	Terpene
chrom 4	25	unitig_3	626679	674237	T1pks		unitig_1	580746	628304	T1pks		unitig_2	643950	691507	T1pks		unitig_1	735068	782659	T1pks		unitig_3	701465	749056	T1pks		unitig_4	623495	671052	T1pks
chrom 4	26	unitig_3	1284415	1395649	T1pks-Nrps		unitig_1	1239435	1350029	T1pks-Nrps		unitig_2	1290043	1400390	T1pks-Nrps		unitig_1	1381174	1491669	T1pks-Nrps		unitig_3	1347562	1458057	T1pks-Nrps		unitig_4	1269514	1380001	T1pks-Nrps
chrom 4	27	unitig_3	1833595	1884518	T1pks		unitig_1	1782280	1827705	T1pks
chrom 4	28	unitig_3	4123604	4175735	T1pks-Nrps		unitig_1	4134046	4186177	T1pks-Nrps		unitig_2	4182840	4234971	T1pks-Nrps		unitig_1	4471753	4523884	T1pks-Nrps		unitig_3	4437995	4490126	T1pks-Nrps		unitig_4	4187271	4239402	T1pks-Nrps
chrom 4	29	unitig_3	4444427	4496397	T1pks-Nrps		unitig_1	4463021	4514990	T1pks-Nrps		unitig_2	4511701	4563671	T1pks-Nrps		unitig_1	4797628	4849597	T1pks-Nrps		unitig_3	4763858	4815827	T1pks-Nrps		unitig_4	4519247	4571216	T1pks-Nrps
chrom 4	30	unitig_3	4813020	4870804	Nrps		unitig_1	4825482	4883261	Nrps		unitig_2	4887197	4944962	Nrps		unitig_1	5170045	5225432	Nrps		unitig_3	5136268	5191655	Nrps
chrom 4	B						unitig_1	4917258	4969940	T1pks-Nrps
chrom 4	C											unitig_2	4992771	5029157	T1pks
chrom 5	D																unitig_5	8337	134727	T1pks		unitig_5	8130	134520	T1pks
chrom 5	31	unitig_4	447350	497894	Nrps		unitig_32	200862	251385	Nrps		unitig_3	492017	542772	Nrps		unitig_5	506524	557324	Nrps		unitig_5	506306	557106	Nrps		unitig_38	307424	359322	Nrps
chrom 5	32	unitig_4	649461	671031	Terpene		unitig_32	402333	423903	Terpene		unitig_3	692148	713718	Terpene		unitig_5	713067	734637	Terpene		unitig_5	712838	734408	Terpene		unitig_38	531115	552685	Terpene
chrom 5	33	unitig_4	964741	996790	Indole-Terpene		unitig_32	727432	748855	Indole		unitig_3	1018105	1039529	Indole		unitig_5	1030808	1062883	Indole-Terpene		unitig_5	1030554	1062629	Indole-Terpene		unitig_38	858330	890400	Indole-Terpene
chrom 5	34	unitig_4	1963891	2008840	Other		unitig_32	1703851	1748800	Other		unitig_3	1993483	2038261	Other		unitig_5	2017148	2061921	Other		unitig_5	2016866	2061639	Other		unitig_38	1844141	1888914	Other
chrom 5	35	unitig_4	2254996	2307382	T1pks-Nrps		unitig_32	1999454	2051840	T1pks-Nrps		unitig_3	2284662	2337048	T1pks-Nrps		unitig_5	2300464	2352850	T1pks-Nrps		unitig_5	2300166	2352552	T1pks-Nrps		unitig_38	2120065	2172451	T1pks-Nrps
chrom 5	36	unitig_4	2496783	2540387	Other		unitig_32	2240389	2283993	Other		unitig_3	2525957	2569561	Other		unitig_5	2541803	2585406	Other		unitig_5	2541494	2585097	Other		unitig_38	2364167	2407770	Other
chrom 5	37	unitig_4	2943192	2990971	Nrps		unitig_32	2685906	2733685	Nrps		unitig_3	2970592	3018371	Nrps		unitig_5	2986553	3034787	Nrps		unitig_5	2986232	3034466	Nrps		unitig_38	2812552	2860808	Nrps
chrom 5	38	unitig_4	4005901	4048682	Nrps		unitig_32	3747287	3790068	Nrps		unitig_3	4033518	4076299	Nrps		unitig_5	4048223	4126950	T1pks-Nrps		unitig_5	4047881	4126595	T1pks-Nrps		unitig_38	3874534	3917315	Nrps
chrom 6	39	unitig_5	40322	88108	T1pks		unitig_22	1	35830	T1pks
chrom 6	40	unitig_5	301376	379517	Nrps		unitig_22	278654	356795	Nrps		unitig_45	284673	362814	Nrps		unitig_4	263272	345780	Nrps		unitig_32	263193	345701	Nrps		unitig_43	572416	654917	Nrps
chrom 6	41	unitig_5	512433	558730	Nrps		unitig_22	491440	537571	Nrps		unitig_45	501093	547390	Nrps		unitig_4	479733	525630	Nrps		unitig_32	479648	525545	Nrps		unitig_43	788789	834686	Nrps
chrom 6	42	unitig_5	787557	835992	T1pks		unitig_22	752830	801265	T1pks		unitig_45	760479	808914	T1pks		unitig_4	738275	786708	T1pks		unitig_32	738185	786618	T1pks		unitig_43	1047200	1095633	T1pks
chrom 6	43	unitig_5	1925172	1989351	T1pks-Nrps		unitig_22	1896536	1960709	T1pks-Nrps		unitig_45	1887191	1951362	T1pks-Nrps		unitig_4	1864923	1929101	T1pks-Nrps		unitig_32	1864727	1928904	T1pks-Nrps		unitig_43	2173629	2237804	T1pks-Nrps
chrom 6	44	unitig_5	2204077	2248562	Other		unitig_22	2175318	2219803	Other		unitig_45	2170440	2214372	Other
chrom 6	45	unitig_5	2530786	2579094	Nrps		unitig_24	58873	107181	Nrps		unitig_46	87314	135627	Nrps		unitig_4	2510418	2580992	T1pks-Nrps		unitig_41	60950	131524	T1pks-Nrps		unitig_34	56624	104931	Nrps
chrom 6	46	unitig_5	3012511	3059388	T1pks		unitig_24	537985	584862	T1pks		unitig_46	566963	613840	T1pks		unitig_4	3017729	3064606	T1pks		unitig_41	568249	615126	T1pks		unitig_34	547101	593978	T1pks
chrom 6	E																										unitig_34	2471680	2518565	T1pks
